# Supplementary material
Source: PubMed Central journal article supplement (PMC8892628)
Supplement: NIHMS1776933-supplement-1.pdf [file NIHMS1776933-supplement-1.pdf]

# THE LANCET

## Respiratory Medicine

### Supplementary appendix

This appendix formed part of the original submission and has been peer reviewed.  
We post it as supplied by the authors.

Supplement to: Combs MP, Wheeler DS, Luth JE, et al. Lung microbiota predict chronic rejection in healthy lung transplant recipients: a prospective cohort study. *Lancet Respir Med* 2021; published online Jan 15. [http://dx.doi.org/10.1016/S2213-2600\(20\)30405-7](http://dx.doi.org/10.1016/S2213-2600(20)30405-7).

## Online Data Supplement for “Lung microbiota predict chronic rejection in a prospective cohort study of healthy lung transplant recipients”

**Authors:** Michael P. Combs, MD<sup>1</sup>, David S. Wheeler, MD<sup>1</sup>, Jenna E. Luth, BS<sup>1</sup>, Nicole R. Falkowski, MS<sup>1</sup>, Natalie M. Walker, BS<sup>1</sup>, John R. Erb-Downward, PhD<sup>1</sup>, Vibha N. Lama, MBBS<sup>1</sup>, Robert P. Dickson, MD<sup>1,2,3</sup>

**Affiliations:** 1. Division of Pulmonary & Critical Care, University of Michigan, Ann Arbor, Michigan, 2. Department of Microbiology and Immunology, University of Michigan, Ann Arbor, Michigan, 3. Michigan Center for Integrative Research in Critical Care, Ann Arbor, Michigan.

### Experimental Materials and Methods

#### *Study Participants*

Per institutional protocol, all lung transplant recipients receive immunosuppression with prednisone, calcineurin inhibition and an antiproliferative immunosuppressive medication. Basiliximab is used for induction immunosuppression in cases with peri-operative renal insufficiency. The choice of calcineurin inhibitor (cyclosporine vs. tacrolimus) is based on patient tolerance and the dose is titrated to therapeutic serum trough levels per protocol. Antiproliferative medication management (azathioprine vs. mycophenolate) was determined by patient tolerance and biopsy results (patients with acute rejection were preferred to receive mycophenolate), with decisions to reduce the dose, hold, and resume the medication based on pre-specified clinical criteria (e.g. ongoing treatment for an infection, post-transplant lymphoproliferative disorder, lymphopenia; Appendix Table 5). All patients received routine *Pneumocystis jiroveci* prophylaxis and antiviral prophylaxis per protocol. Antifungal prophylaxis was provided to patients with pre-transplant *Aspergillus* colonization or who had otherwise increased risk for invasive fungal disease.

#### *Outcome & Predictor Variables*

After lung transplantation, patients' baseline FEV<sub>1</sub> values were calculated as the average of the two highest values after transplant taken at least 21 days apart.<sup>1</sup> The diagnosis of CLAD was established after 3 months of sustained, definitive decline in FEV<sub>1</sub> to ≤80% of baseline in the absence of another explanation for pulmonary function decline (e.g. airway stenosis, persistent pleural effusion or pulmonary edema, surgical factors, myopathy/neuropathy, weight gain, etc.).<sup>1</sup> The date of CLAD onset was defined as the first day on which a patient had definitive decline in FEV<sub>1</sub>. The date and cause of death were determined by medical record review. For our primary endpoint, we elected to evaluate a composite of development of CLAD or death at 500 days after the one-year surveillance bronchoscopy. This timepoint was selected because it met our criteria of, first, allowing sufficient time for patients to develop CLAD and, second, because we had complete follow-up data on all patients and thus avoided the potential bias associated with censored data.

Demographic predictor variables were obtained upon enrollment in the prospective cohort trial and included age, sex, pre-lung transplant diagnosis, and bilateral vs. single transplant. Clinical predictor variables were obtained via medical record review and included FEV<sub>1</sub> in litres, calcineurin inhibitor regimen, antiproliferative immunosuppression regimen, primary graft dysfunction (PGD) immediately after transplant, average cumulative rejection scores, donor-specific antibodies (DSA) presence, BAL cell count, culture, BAL culture results, BAL respiratory virus PCR results, any history of CMV pneumonitis, any history of community-acquired respiratory viral infections, and recent antibiotic use. FEV<sub>1</sub> was obtained per-protocol at all clinic visits according to American Thoracic Society/European Respiratory Society guidelines.<sup>2</sup> The FEV<sub>1</sub> value at the nearest available time prior to bronchoscopy was analyzed. Calcineurin inhibitor regimen and antiproliferative immunosuppression on the date of the bronchoscopy were assessed via documentation in the medical record and University of Michigan Organ Transplant Center Information System. PGD was assessed at the earliest timepoint available after transplantation, consistent with prior work.<sup>3</sup> PGD was graded as grade 0 if chest imaging was not consistent with pulmonary edema. For patients whose imaging was consistent with pulmonary edema, PGD severity was determined on the basis of PaO<sub>2</sub>/FiO<sub>2</sub> ratio (if PaO<sub>2</sub> was unavailable, the SpO<sub>2</sub>/FiO<sub>2</sub> ratio was used) as described in the ISHLT Consensus Report: grade 1 for PaO<sub>2</sub>/FiO<sub>2</sub> >300 (SpO<sub>2</sub>/FiO<sub>2</sub> >315), grade 2 for PaO<sub>2</sub>/FiO<sub>2</sub> 200-300 (SpO<sub>2</sub>/FiO<sub>2</sub> 315-235), and grade 3 for PaO<sub>2</sub>/FiO<sub>2</sub> <200 (SpO<sub>2</sub>/FiO<sub>2</sub> <235).<sup>4</sup> Cumulative rejection scores were calculated by adding the ordinal values of each biopsy specimen's A or B score divided by the total number of biopsies performed.<sup>5</sup> DSA were evaluated via Luminex bead assay and analyzed as positive or negative per institutional protocol (mean fluorescence intensity ≥3000 interpreted as positive). BAL cell type percentage, bacterial culture, and respiratory virus PCR were assessed and reported per the clinical laboratory protocol. BAL bacterial culture was analyzed as negative (no bacterial growth on culture), oral flora (positive culture that was deemed not clinically significant and, therefore, not speciated per microbiology laboratory protocol), and positive culture (any positive culture for which a bacterial species was identified). History of CMV pneumonitis was determined by CMV inclusions seen on histopathology from transbronchial biopsy or a positive CMV culture from BAL in the presence of lower respiratory tract symptoms. History of community-acquired respiratory viral culture was defined as positive respiratory viral PCR for: influenza A, influenza B, respiratory syncytial virus (RSV), parainfluenza virus, human metapneumovirus, adenovirus, coronavirus, or human rhinocenterovirus in the presence of lower respiratory tract symptoms or radiographic infiltrates.<sup>6</sup> Antibiotic usage was analyzed as receipt of a systemic or inhaled antibiotic, other than *Pneumocystis* prophylaxis, in the 30 days preceding the bronchoscopy (Appendix Table 6).

### *Specimen processing*

BAL fluid was filtered through sterile gauze to remove noncellular material and/or mucous. Cells were separated via centrifugation (1000 g for 4 min) and the cell-free supernatant was frozen at  $-80^{\circ}\text{C}$  for subsequent assays. Cell-free supernatants were subsequently centrifuged (22,500g for 30 min), and the resulting pellet was used for DNA isolation. Acellular BAL pellets resuspended in 360 $\mu\text{l}$  ATL buffer (Qiagen DNeasy Blood & Tissue kit). Sterile laboratory water and AE buffer used in DNA isolation were collected and analyzed as potential sources of contamination, as were extraction controls (empty isolation tubes) and blank sequencing wells.

### *Bacterial DNA isolation*

Genomic DNA was extracted from BAL pellets (Qiagen DNeasy Blood & Tissue kit, Qiagen, Hilden, Germany) using a modified protocol previously demonstrated to isolate bacterial DNA.<sup>7</sup> Sterile laboratory water and AE buffer used in DNA isolation were collected and analyzed as potential sources of contamination. Specimens were processed in a randomized order to minimize the risk of false pattern formation due to reagent contamination.<sup>8</sup>

### *16S rRNA gene sequencing*

The V4 region of the 16S rRNA gene was amplified using published primers<sup>9</sup> and the dual-indexing sequencing strategy developed by the laboratory of Patrick D. Schloss.<sup>10</sup> Sequencing was performed using the Illumina MiSeq platform (San Diego, CA), using a MiSeq Reagent Kit V2 (500 cycles), according to the manufacturer's instructions with modifications found in the Schloss standard operating procedure.<sup>11</sup> Accuprime High Fidelity Taq was used in place of Accuprime Pfx SuperMix. Primary PCR cycling conditions were  $95^{\circ}\text{C}$  for two minutes, followed by 20 cycles of touchdown PCR ( $95^{\circ}\text{C}$  20 seconds,  $60^{\circ}\text{C}$  20 seconds and decreasing 0.3 degrees each cycle,  $72^{\circ}\text{C}$  5 minutes), then 20 cycles of standard PCR ( $95^{\circ}\text{C}$  for 20 seconds,  $55^{\circ}\text{C}$  for 15 seconds, and  $72^{\circ}\text{C}$  for 5 minutes), and finished with  $72^{\circ}\text{C}$  for 10 minutes.

### *Bacterial DNA quantification*

Bacterial DNA was quantified using a QX200 Droplet Digital PCR System (BioRad, Hercules, CA). Primers and cycling conditions were performed according to a previously published protocol.<sup>12</sup> Specifically, primers were 5'- GCAGGCCTAACACATGCAAGTC-3' (63F) and 5'- CTGCTGCCTCCCGTAGGAGT-3' (355R). The cycling protocol was 1 cycle at  $95^{\circ}\text{C}$  for 5 minutes, 40 cycles at  $95^{\circ}\text{C}$  for 15 seconds and  $60^{\circ}\text{C}$  for 1 minute, 1 cycle at  $4^{\circ}\text{C}$  for 5 minutes, and 1 cycle at  $90^{\circ}\text{C}$  for 5 minutes all at a ramp rate of  $2^{\circ}\text{C}/\text{second}$ . The BioRad C1000 Touch Thermal Cycler was used for PCR cycling. Droplets were quantified using the Bio-Rad Quantisoft software. No-template control specimens were used and were run alongside BAL specimens.

### *Statistical analysis*

The sequence data from BAL fluid and control specimens were processed and analyzed using the software *mothur* v.1.38.0 according to the standard operating procedure for MiSeq sequence data.<sup>13</sup> A shared community file and a phylotyped (genus-level grouping) file were generated using operational taxonomic units (OTU) binned at 97% identity generated using the *dist.seqs*, *cluster*, *make.shared* and *classify.otu* commands in *mothur*, as previously described.<sup>14,15</sup>

The OTU numbers referenced in the manuscript were assigned arbitrarily during the binning process. Classification of OTU was carried out using the *mothur* implementation of the Ribosomal Database Project (RDP) Classifier and the RDP taxonomy training set 14 (Trainset14\_032015.rdp), available on the *mothur* website. Sequences are available via the NCBI Sequence Read Archive (accession number PRJNA615630). OTU, taxonomy, and metadata tables are available at <https://github.com/combspulmonarydata/HealthyLungTx>.

Microbial ecology analysis was performed using the *vegan* package and *mvabund* in R version 3.6.1 (R Foundation for Statistical Computing, Vienna, Austria).<sup>16,17</sup> All OTU were included in diversity analysis. For relative abundance and ordination analysis, samples were normalized to the percent of total reads and we restricted analysis to OTU that were present at greater than 1% of the sample population, as previously described.<sup>15</sup> We performed ordinations using a principal component analysis on Hellinger-transformed normalized OTU tables generated using Euclidean distances; we presented these graphically as a biplot.<sup>18</sup> We determined significance in community composition comparisons using both the *adonis* function of *vegan*,<sup>16</sup> which performs permutational multivariate analysis of variance (PERMANOVA) using 10,000 permutations, and *mvabund*,<sup>17</sup> a model-based approach to analysis of multivariate abundance data.

### *Adequacy of sequencing and exclusion of specimens*

Bacterial community analysis (using 16S rRNA gene amplicon sequencing) was performed on all specimens. We obtained  $23,571 \pm 12,914$  16S rRNA gene copies per specimen. Three specimens had inadequate amplification ( $<1,000$  16S rRNA gene copies) and were excluded from sequencing analysis (though included in ddPCR analysis). No bacterial taxa were excluded from analysis.

## **Supplemental Results**

### *The microbiota of one-year surveillance BAL specimens are distinct from those of background sequencing controls*

Cell-free BAL specimens are commonly used in lung microbiome studies.<sup>19-21</sup> However, similar to all low-biomass microbiome studies, these samples are vulnerable to contamination from bacterial DNA present in reagents used for DNA extraction and library

preparation.<sup>22</sup> Therefore, our first priority was to confirm that we could detect a bacterial signal in the cell-free BAL specimens samples that was distinct from the no-template specimens (n=26), AE buffer specimens (n=8), sterile water used in DNA extraction (n=8), and extraction control specimens (n=4) that were included as negative controls.

First, we used droplet digital PCR to quantify bacterial DNA. The bacterial DNA burden in the BAL samples had a range of 1,007—15,708,014 copies/mL, with a median of 3563 copies/mL (IQR 2377-8316). In comparison, the bacterial DNA burden in our negative control samples had a range of 222—1,386 copies/mL, with a median of 776 copies/mL (IQR 678-934). Overall, we found a significantly higher burden in BAL specimens vs. no-template control specimens ( $p < 0.0001$ , Appendix Figure 1A).

Next, we used 16S rRNA gene sequencing to demonstrate that there was a difference in bacterial community composition between BAL specimens and negative controls ( $p < 0.0001$ ). Principle components analysis showed distinct clustering of BAL specimens from the various negative control specimens, although some overlap was observed (Appendix Figure 1B). Likewise, rank abundance analysis showed obvious differences in the relative abundance of taxa in the negative controls and BAL specimens (Appendix Figure 1C). We observed significant differences in the relative abundance of the following bacterial families: Comamonadaceae, Flavobacteriaceae, Prevotellaceae (all 0.001), Verrucomicrobiaceae (0.002), and Streptococcaceae (0.005).

#### *Evaluating the association of microbiome characteristics with demographic and clinical variables*

We performed multiple exploratory analyses to evaluate whether any of the available demographic or clinical variables were associated with bacterial burden, community diversity, community richness, or overall community composition.

Previous research has demonstrated that primary graft dysfunction,<sup>3</sup> acute cellular rejection,<sup>5</sup> lymphocytic bronchiolitis,<sup>24</sup> presence of DSA,<sup>25,26</sup> CMV pneumonitis,<sup>27,28</sup> and community-acquired respiratory viral infections<sup>6</sup> represent risk factors for subsequent development of CLAD. Therefore, we first investigated if known risk factors for CLAD were correlated with bacterial burden or any other microbiome characteristic. We found no detectable association between microbiome characteristics and PGD grade assessed immediately after transplant (Appendix Figure 13), cumulative Grade A rejection score (Appendix Figure 14), cumulative Grade B rejection score (Appendix Figure 15), DSA presence (Appendix Figure 16), any history of community-acquired respiratory viral infections (Appendix Figure 21), or any history of CMV pneumonitis (Appendix Figure 22). We thus concluded that the lung microbiome characteristics are not correlated with known clinical risk factors for CLAD.

Next we asked if there were associations between microbiome characteristics and immunosuppression regimen and recent antibiotic exposure. As our study was not designed or powered to evaluate more remote exposures, we chose to limit our analyses to medications received at or near the time of one-year surveillance bronchoscopy. There was no association between microbiome characteristics and calcineurin inhibitor regimen (Appendix Figure 11), antiproliferative immunosuppression regimen (Appendix Figure 12), antibiotic use—other than *Pneumocystis jiroveci* prophylaxis—in the 30 days prior to bronchoscopy (Appendix Figure 23), and receiving azithromycin for CLAD prevention (Appendix Figure 24). Although the use of induction immunosuppression at our center was rare, we did find that induction immunosuppression with basiliximab was associated with having a lower bacterial burden (Appendix Figure 10A); but had no significant effect on community diversity, community richness, or overall community composition (Appendix Figure 10B-10D). We thus concluded that immunosuppression regimen and having any recent antibiotic exposure at the time of one-year surveillance bronchoscopy are not associated with difference in microbiome characteristics.

We then investigated whether other clinical variables—e.g. lung function, BAL cellularity, current BAL bacterial culture results, or having a history of prior positive respiratory bacterial cultures—have any association with microbiome characteristics. Perhaps unsurprisingly, we found that having a BAL bacterial culture with either oral flora or a speciated pathogen was associated with having a higher bacterial burden (Appendix Figure 19A) and with differences in overall community composition (Appendix Figure 19D) relative to having a BAL bacterial culture with no growth. BAL culture results were not correlated with either community diversity (Appendix Figure 19B) or community richness (Appendix Figure 19C). Additionally, we observed a difference in overall community composition between samples with BAL neutrophil  $\geq 15\%$  vs. those with BAL neutrophil  $< 15\%$  (Appendix Figure 17D). Of note, this dichotomization was chosen based on a clinical cutoff to facilitate visualization; when BAL neutrophil percent was analyzed a continuous variable, there was no significant association with community composition. There was no association between BAL neutrophil percentage and bacterial burden, community diversity, and community richness. There was no association between patients' one-year post-transplant FEV<sub>1</sub> values (Appendix Figure 9), BAL lymphocyte percentage (Appendix Figure 18), and number of prior positive respiratory cultures (Appendix Figure 20) and any microbiome characteristics.

Last, among the demographic variables, patient age was inversely correlated with bacterial burden (Spearman's  $\rho = -0.201$ ,  $p = 0.017$ , Appendix Figure 5A). Community diversity, community richness, and overall community composition was not associated with patients' age (Appendix Figure 5B-5D). There was no association between any microbiome characteristics and patients' sex (Appendix Figure 6), pre-transplant diagnosis (Appendix Figure 7), double vs. single lung transplant (Appendix Figure 8).

*Increased lung bacterial burden predicts shorter CLAD-free survival over 500 days of follow-up, more rapid CLAD development over 500 days of follow-up, and shorter CLAD-free survival over 2000 days of follow-up*

We used a univariate Cox regression models to evaluate the association of each of the variables included in Table 1 on the development of CLAD or death. These analyses are presented in Table 2. Next, to account for potential confounding, we used a multivariable Cox regression model to more rigorously evaluate the association between bacterial burden and CLAD-free survival. In this model we included: the available known risk factors for CLAD (pre-transplant diagnosis,<sup>23</sup> primary graft dysfunction,<sup>3</sup> acute cellular rejection,<sup>5</sup> lymphocytic bronchiolitis,<sup>24</sup> presence of DSA,<sup>25,26</sup> CMV pneumonitis,<sup>27,28</sup> and community-acquired respiratory viral infections<sup>6</sup>), variables that were associated with our primary outcome in univariate analyses (antiproliferative immunosuppression regimen, Table 1), and variables associated with bacterial burden (age [Appendix Figure 5], induction immunosuppression [Appendix Figure 10], and concurrent BAL bacterial culture results [Appendix Figure 19]). We observed collinearity between age and pre-transplant diagnosis; thus, to minimize overfitting, age was not included in the final model. As shown in Table 2, increasing lung bacterial burden was an independent predictor of developing CLAD or death, whether analyzed as a continuous variable (HR 2.49 per log<sub>10</sub> increase, 95% CI 1.38 – 4.48;  $p=0.0024$ ) or as tertiles (Middle vs. Lowest bacterial burden HR 4.94, 95% CI 1.25-19.21,  $p=0.022$ ; Highest vs. Lowest bacterial burden HR 10.56, 95% CI 2.53-44.08,  $p=0.0012$ ). We thus concluded that lung bacterial burden is an independent predictor of CLAD-free survival.

To evaluate the robustness of this finding, we then performed a sensitivity analysis to evaluate the effect of lung bacterial burden on the development of CLAD alone. For this analysis, the five patients who died prior having established the diagnosis of CLAD via repeated pulmonary function testing as described in the 2019 ISHLT CLAD consensus document<sup>29</sup> were considered to not have developed the outcome of interest. In univariate survival analyses (Appendix Figure 3) patients with the highest bacterial burden has increased risk of developing CLAD compared to those with the lowest bacterial burden ( $p=0.0068$ ). In multivariate analysis, lung bacterial burden remained a predictor of CLAD when analyzed as a continuous variable (HR for each 10-fold increase in bacterial burden 2.05, 95% CI 1.10-3.94,  $p=0.030$ ), and categorically as tertiles (Lowest vs. Middle, HR 4.71, 95% CI 1.10-20.06,  $p=0.036$ , Lowest vs. Highest, HR 9.26, 95% CI 2.04-42.07,  $p=0.0039$ ; Appendix Table 3).

Finally, we evaluated the effect of lung bacterial burden on CLAD-free survival at more distant time points. When analyzed as a continuous variable, bacterial burden remained a significant predictor of developing CLAD or death through 2000 days of follow-up (HR 1.55 per log<sub>10</sub> increase, 95% CI 1.04 – 2.30,  $p=0.030$ ; Appendix Table 4). The Kaplan Meier survival curves for patients stratified into bacterial burden tertiles are presented in Appendix Figure 4. In univariate survival analyses, bacterial burden tertile is a significant predictor of developing CLAD or death at all the time points between 300 and 800 days of follow-up. In the multivariable survival analysis, bacterial burden tertile remains a significant predictor through 1000 days of follow-up. We thus concluded that the association of increased lung bacterial burden with shorter CLAD-free survival is robust to alternative analytic approaches.

*Evaluating for potential confounding and interactions between the lung microbiome, CLAD-free survival, and relevant predictor variables*

As with all cohort studies, our study is limited by the potential of confounding or interaction between our primary outcome and predictor variables. In order to robustly interrogate our key finding that bacterial burden is associated with shorter CLAD free survival, we performed *post hoc* analyses evaluating the potential interactions between bacterial burden, relevant predictor variables, and our composite outcome.

Antiproliferation immunosuppression regimen at the time of surveillance bronchoscopy differed among patients who did and did not develop the composite outcome (Table 1), and the use of mycophenolate was associated with longer CLAD-free survival in our multivariate model (Table 2). Therefore, we investigated whether immunosuppression regimen was a potential confounding variable, and whether there was an interaction between bacterial burden and immunosuppression on CLAD-free survival. First, we more carefully investigated the fifteen patients were not receiving an antiproliferative agent for immunosuppression at the time of one-year surveillance bronchoscopy. The clinical contexts for holding immunosuppression are summarized in Appendix Table 5. Briefly, eight patients of these were receiving treatment for CMV viremia, one patient was being treated for a chronic bacterial infection, five had leukopenia or other laboratory abnormalities, one had history of PTLD, and one had immunosuppression empirically held for one day at a local hospital. Next, we excluded the possibility that immunosuppression regimen at the time of surveillance bronchoscopy was a confounder, as it was not associated with bacterial burden (Appendix Figure 12A). This analysis was unchanged if the patient who only had immunosuppression held for one day was analyzed as having received immunosuppression. Finally, we did not observe any interaction between bacterial burden and immunosuppression (Appendix Table 7). We thus concluded that antiproliferative immunosuppression is not associated with microbiome characteristics, and that the predictive significance of bacterial burden on CLAD-free survival is not attributable to variation in immunosuppression regimens.

While not statistically significant, patients with a pre-transplant diagnoses categorized as “Other” or cystic fibrosis tended to develop our composite outcome at lower rates than patients with COPD or IPF (Table 1). Thus, we further investigated whether pre-transplant diagnosis represented a potential confounder or modifier of the association between bacterial burden and CLAD-free survival. We did not find sufficient evidence to suggest confounding, as pre-transplant diagnosis is not associated with bacterial burden (Appendix Figure 7A). In models evaluating the interaction of pre-transplant diagnosis and bacterial burden we did not find evidence of an

interaction; importantly, as only three patients with cystic fibrosis and two patients who had a pre-transplant diagnosis categorized as “Other” developed our primary outcome, there was very limited power to detect possible interactions.

Finally, although pre-transplant diagnosis was not associated with either our primary outcome or bacterial burden, we did note that the age of patients with cystic fibrosis (mean  $32.2 \pm 8.9$ ) and a pre-transplant diagnosis of “Other” (mean  $50.4 \pm 11.9$ ) was lower than those with COPD (mean  $59.5 \pm 5.5$ ) and ILD (mean  $57.5 \pm 7.7$ ; all pairwise comparisons  $p < 0.05$  except COPD vs. ILD and ILD vs. other). Although there was an inverse correlation between age and bacterial burden (Appendix Figure 5A), age was not associated with development of our primary outcome, minimizing the possibility that age is a confounder. Furthermore, we did not find evidence of an interaction between age and bacterial burden in our survival models (Appendix Table 8). We thus concluded that there was no detectable evidence that the association of increased bacterial burden with shorter CLAD-free survival was not confounded or modified by pre-transplant diagnosis or age.

#### *16S-identified evidence of P. aeruginosa is not predictive of CLAD or death*

Because the family *Pseudomonadaceae* is comprised of many species with varying clinical significance<sup>30</sup>, we wanted to determine if we could use 16S sequencing to identify *P. aeruginosa* among the OTU from this family. We have previously demonstrated it is possible to approximate species-level resolution among the genus *Pseudomonas* from 16S sequencing by comparing the 97% homologous representative nucleotide sequences for each OTU to the National Center for Biotechnology Information (NCBI) Basic Local Alignment Search Tool (BLAST).<sup>31</sup> Using this approach, we found 78 speciated bacterial strains in the NCBI database that shared 100% coverage and homology with OTU 0006; of these, 76 were identified as *P. aeruginosa*. None of the representative sequences from the other five *Pseudomonas* OTU had 100% overlap with any strains identified as *P. aeruginosa* in the NCBI database. We thus concluded that OTU 0006 represented *P. aeruginosa*. Sixteen (11.9%) of the samples in our cohort had detectable OTU 0006: *P. aeruginosa* (relative abundance range 1.4%-98.6%, mean  $30.9\% \pm 37.8\%$ ). Six of these patients had detectable *P. aeruginosa* on concurrent BAL bacterial culture, and an additional four had prior BAL cultures with *P. aeruginosa*. One patient had a positive *P. aeruginosa* culture and no evidence of OTU 0006 on 16S sequencing. There was no association between the developing CLAD or death and OTU 0006: *P. aeruginosa* when analyzed as present vs. absent ( $p=0.68$ ) or by increasing relative abundance ( $p=0.14$ ). We thus concluded that the association between increased bacterial DNA burden and risk of CLAD development is not attributable to the presence or relative abundance of *Pseudomonas* spp.

### List of Supplementary Figures:

|                     |                                                                                                                                       |       |
|---------------------|---------------------------------------------------------------------------------------------------------------------------------------|-------|
| Appendix Figure 1:  | Evidence for distinct microbial signal in cell-free BAL specimens                                                                     | p. 8  |
| Appendix Figure 2:  | Microbial diversity or richness in surveillance BAL samples are not associated with development of CLAD or death within 500 days.     | p. 9  |
| Appendix Figure 3:  | Increased lung bacterial burden predicts development of chronic lung allograft dysfunction                                            | p. 10 |
| Appendix Figure 4:  | Lung bacterial burden and development of chronic rejection or death over 2000 days of follow-up                                       | p. 11 |
| Appendix Figure 5:  | Comparing respiratory microbiome characteristics on the basis of patient age                                                          | p. 12 |
| Appendix Figure 6:  | Comparing respiratory microbiome characteristics on the basis of patient sex                                                          | p. 13 |
| Appendix Figure 7:  | Comparing respiratory microbiome characteristics on the basis of pre-transplant diagnosis                                             | p. 14 |
| Appendix Figure 8:  | Comparing respiratory microbiome characteristics on the basis of double vs. single lung transplant                                    | p. 15 |
| Appendix Figure 9:  | Comparing respiratory microbiome characteristics on the basis of FEV <sub>1</sub> values                                              | p. 16 |
| Appendix Figure 10: | Comparing respiratory microbiome characteristics on the basis of induction immunosuppression                                          | p. 17 |
| Appendix Figure 11: | Comparing respiratory microbiome characteristics on the basis of calcineurin inhibition regimen                                       | p. 18 |
| Appendix Figure 12: | Comparing respiratory microbiome characteristics on the basis of antiproliferative immunosuppression regimen                          | p. 19 |
| Appendix Figure 13: | Comparing respiratory microbiome characteristics on the basis of primary graft dysfunction immediately following lung transplantation | p. 20 |
| Appendix Figure 14: | Comparing respiratory microbiome characteristics on the basis of biopsy-proven acute cellular rejection episodes                      | p. 21 |
| Appendix Figure 15: | Comparing respiratory microbiome characteristics on the basis of biopsy-proven lymphocytic bronchiolitis episodes                     | p. 22 |
| Appendix Figure 16: | Comparing respiratory microbiome characteristics on the basis of donor specific antibody presence                                     | p. 23 |
| Appendix Figure 17: | Comparing respiratory microbiome characteristics on the basis of BAL neutrophil percentage                                            | p. 24 |
| Appendix Figure 18: | Comparing respiratory microbiome characteristics on the basis of BAL lymphocyte percentage                                            | p. 25 |
| Appendix Figure 19: | Comparing respiratory microbiome characteristics on the basis of BAL bacterial culture results                                        | p. 26 |
| Appendix Figure 20: | Comparing respiratory microbiome characteristics on the basis of prior positive respiratory cultures                                  | p. 27 |
| Appendix Figure 21: | Comparing respiratory microbiome characteristics on the basis of prior community-acquired respiratory viral infections                | p. 28 |
| Appendix Figure 22: | Comparing respiratory microbiome characteristics on the basis of prior CMV pneumonitis                                                | p. 29 |
| Appendix Figure 23: | Comparing respiratory microbiome characteristics on the basis of recent antibiotic exposure                                           | p. 30 |
| Appendix Figure 24: | Comparing respiratory microbiome characteristics on the basis of receipt of azithromycin for CLAD prevention                          | p. 31 |

**List of Supplementary Tables:**

|                   |                                                                                                                                                                                                                                           |       |
|-------------------|-------------------------------------------------------------------------------------------------------------------------------------------------------------------------------------------------------------------------------------------|-------|
| Appendix Table 1: | Comparison of community composition by taxonomic level on between patients who develop CLAD or death within 500 days of one-year surveillance bronchoscopy vs. CLAD-free survivors                                                        | p. 32 |
| Appendix Table 2: | Patients with evidence of <i>P. aeruginosa</i> on BAL culture or 16S rRNA gene sequencing                                                                                                                                                 | p. 33 |
| Appendix Table 3: | Predictors of developing CLAD in the 500 days after one-year post-transplant surveillance BAL                                                                                                                                             | p. 34 |
| Appendix Table 4: | Predictors of developing CLAD or death in the 2000 days after one-year post-transplant surveillance BAL                                                                                                                                   | p. 35 |
| Appendix Table 5: | Detailed clinical information for patients who were not receiving an antiproliferative immunosuppression medication at the time of one-year post-transplant surveillance bronchoscopy                                                     | p. 36 |
| Appendix Table 6: | Detailed clinical information for patients who received antibiotics within 30 days of one-year post-transplant surveillance bronchoscopy                                                                                                  | p. 38 |
| Appendix Table 7: | Evaluating the independent effects and interaction of immunosuppression regimen at the time of surveillance bronchoscopy and bacterial burden on developing CLAD or death in the 500 days after one-year post-transplant surveillance BAL | p. 40 |
| Appendix Table 8: | Evaluating the independent effects and interaction of patient age and bacterial burden on developing CLAD or death in the 500 days after one-year post-transplant surveillance BAL                                                        | p. 41 |



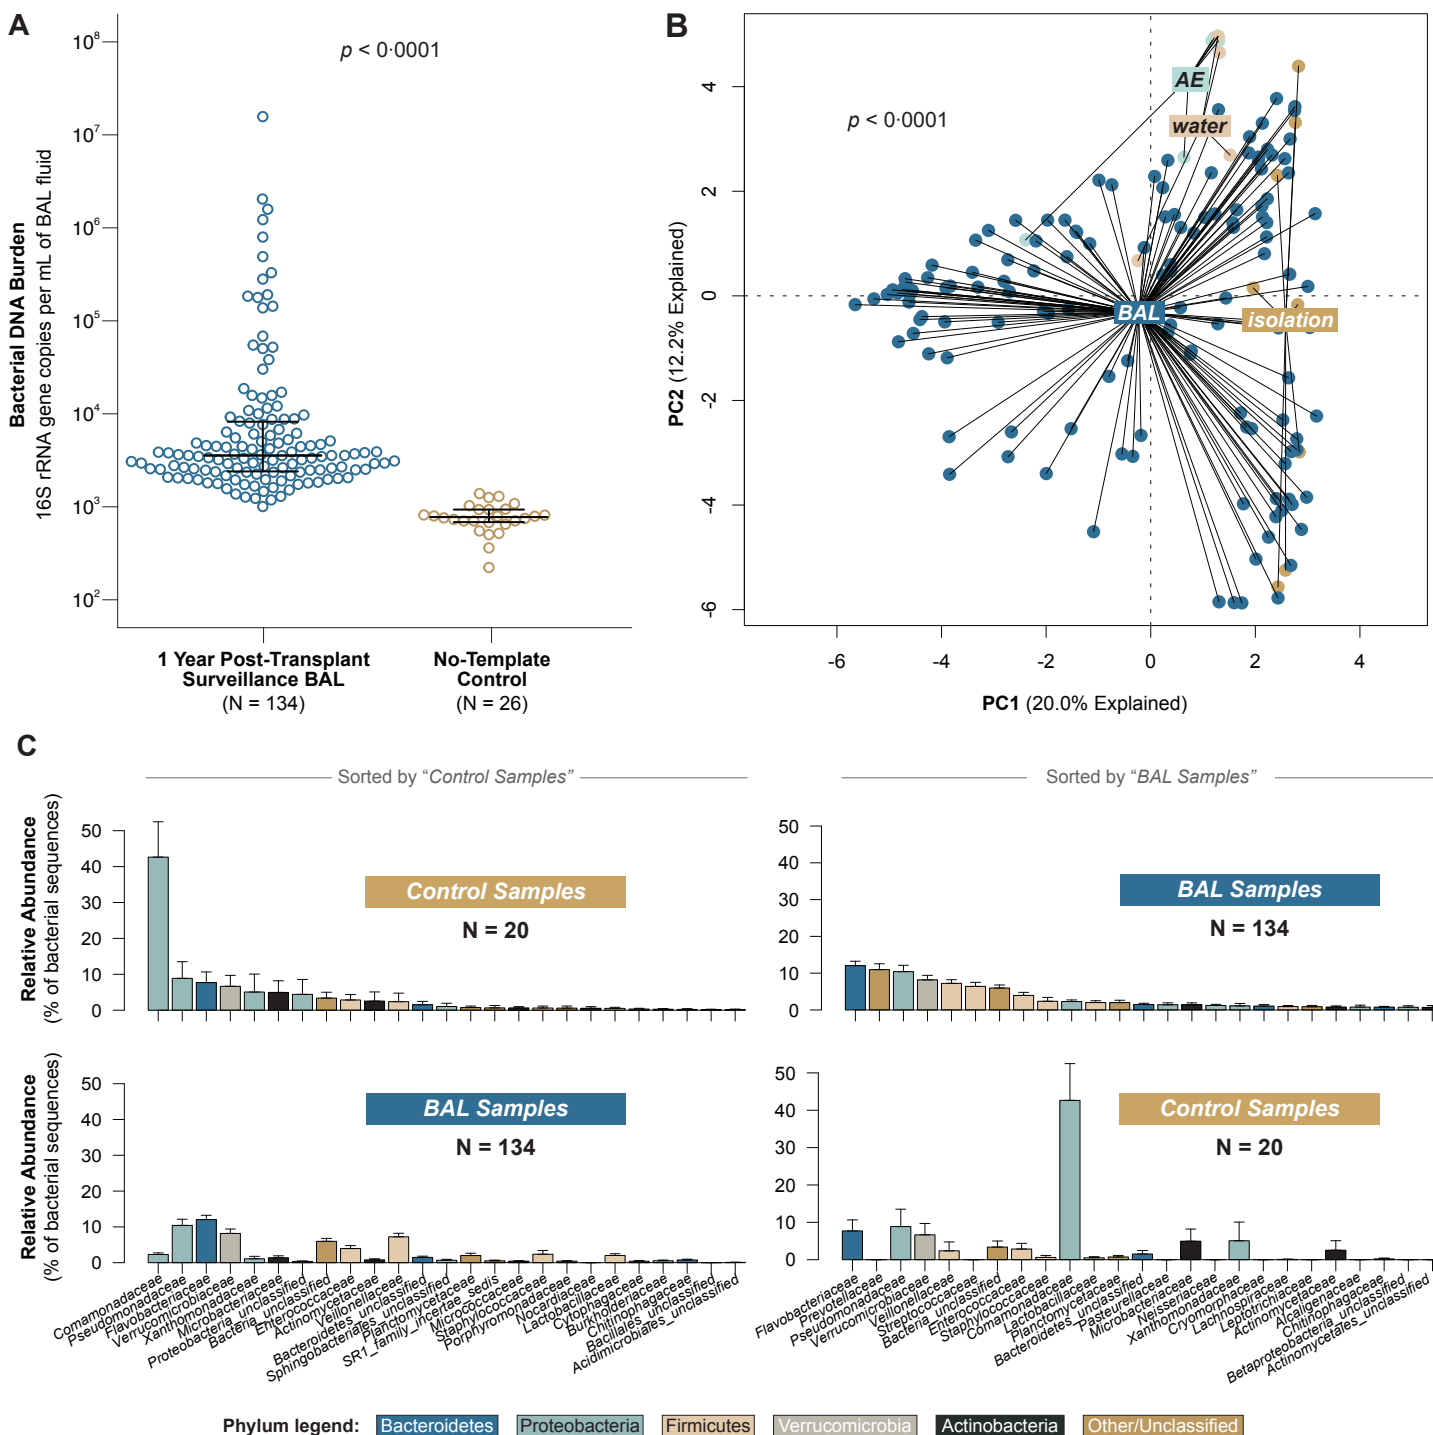

### Appendix Figure 1: Evidence of distinct microbial signal in cell-free BAL specimens.

Bacterial DNA was quantified and identified in 1-year post-transplant surveillance bronchialveolar lavage (BAL) fluid using droplet digital PCR (A) and 16S RNA gene amplicon sequencing (B, C), respectively. The bacterial burden in BAL specimens was significantly higher than in no template controls. (A) Likewise, the community composition of the BAL specimens differed significantly compared to the negative control specimens. (B) Rank abundance comparison (C) of prominent taxa for the negative controls and BAL specimens. For each comparison, the 20 most abundant taxa from the reference group are displayed in decreasing order of relative abundance (mean  $\pm$  SD). Asterisks indicate taxa as significantly distinct across groups. Hypotheses testing performed using Wilcoxon rank-sum test (A) PERMANOVA (B), and mvabund (C). (A) Lines indicate median and interquartile range.

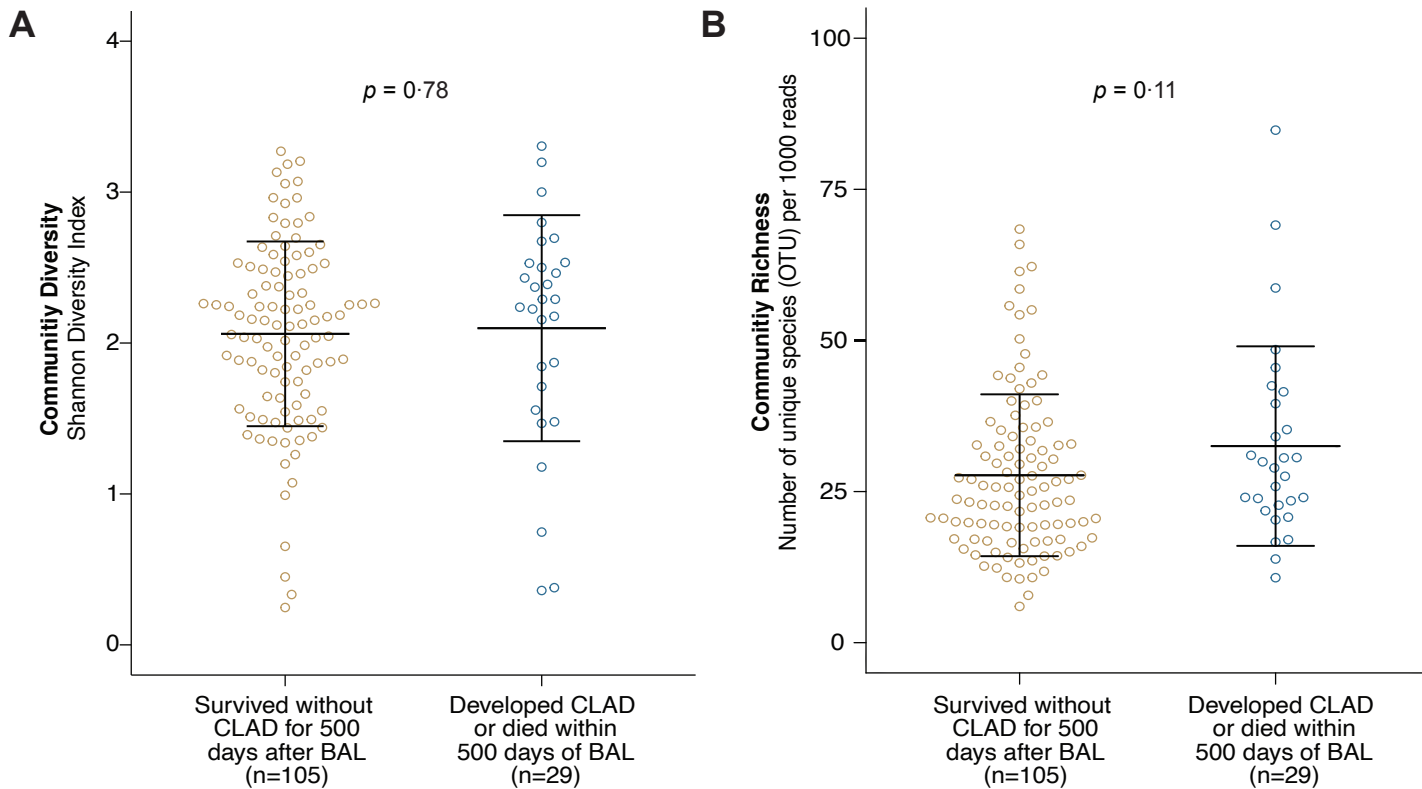

**Appendix Figure 2: Microbial diversity or richness in surveillance BAL samples are not associated with development of CLAD or death within 500 days.**

The distribution of A) community diversity (measured by the Shannon diversity index) and B) richness (number of unique taxa, i.e. operational taxonomic units [OTU], per 1000 reads) in one-year surveillance bronchoalveolar lavage (BAL) did not differ among patients who developed chronic lung allograft dysfunction (CLAD) or death within 500 days and CLAD free survivors. Hypothesis testing performed using two sample t tests. Lines indicate mean  $\pm$  standard deviation.

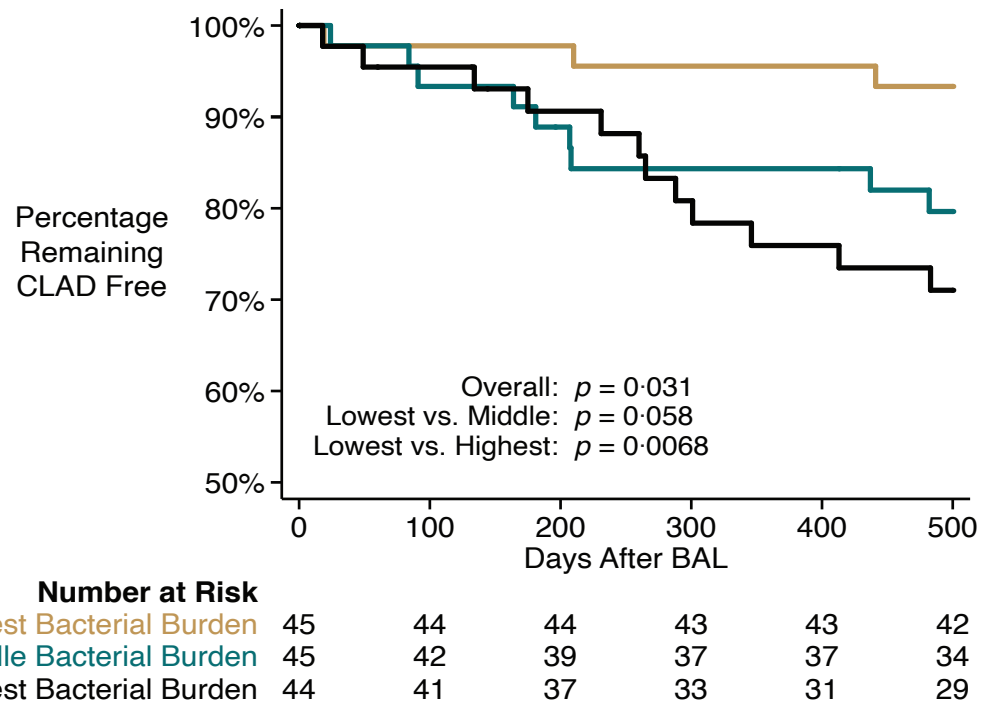

**Appendix Figure 3: Increased lung bacterial burden predicts development of chronic lung allograft dysfunction.**

We quantified bacterial DNA in asymptomatic one-year surveillance BAL specimens using droplet digital PCR. Patients were then divided into tertiles of lowest, middle, and highest bacterial burden as described elsewhere. Kaplan-Meier curves illustrating the time to developing CLAD are presented. Hypothesis testing performed using univariate Cox proportional hazards model.

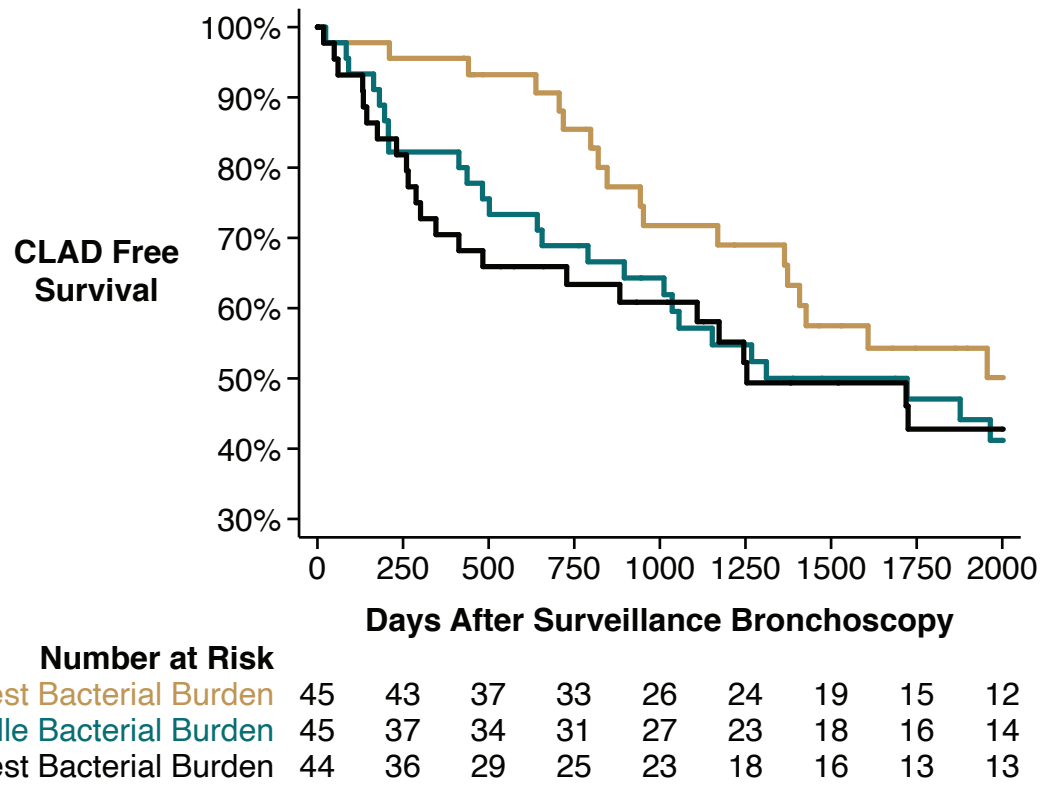

**Appendix Figure 4: Lung bacterial burden and development of chronic rejection or death over 2000 days of follow-up.**

We quantified bacterial DNA in asymptomatic one-year surveillance BAL specimens using droplet digital PCR. Patients were then divided into tertiles of lowest, middle, and highest bacterial burden as described elsewhere. Kaplan-Meier curves illustrating the time to development of CLAD or death are presented. Lung bacterial burden tertiles are associated with an increased risk of developing CLAD or death at all time points between 300 and 800 days of follow-up in univariate Cox proportional hazards models.

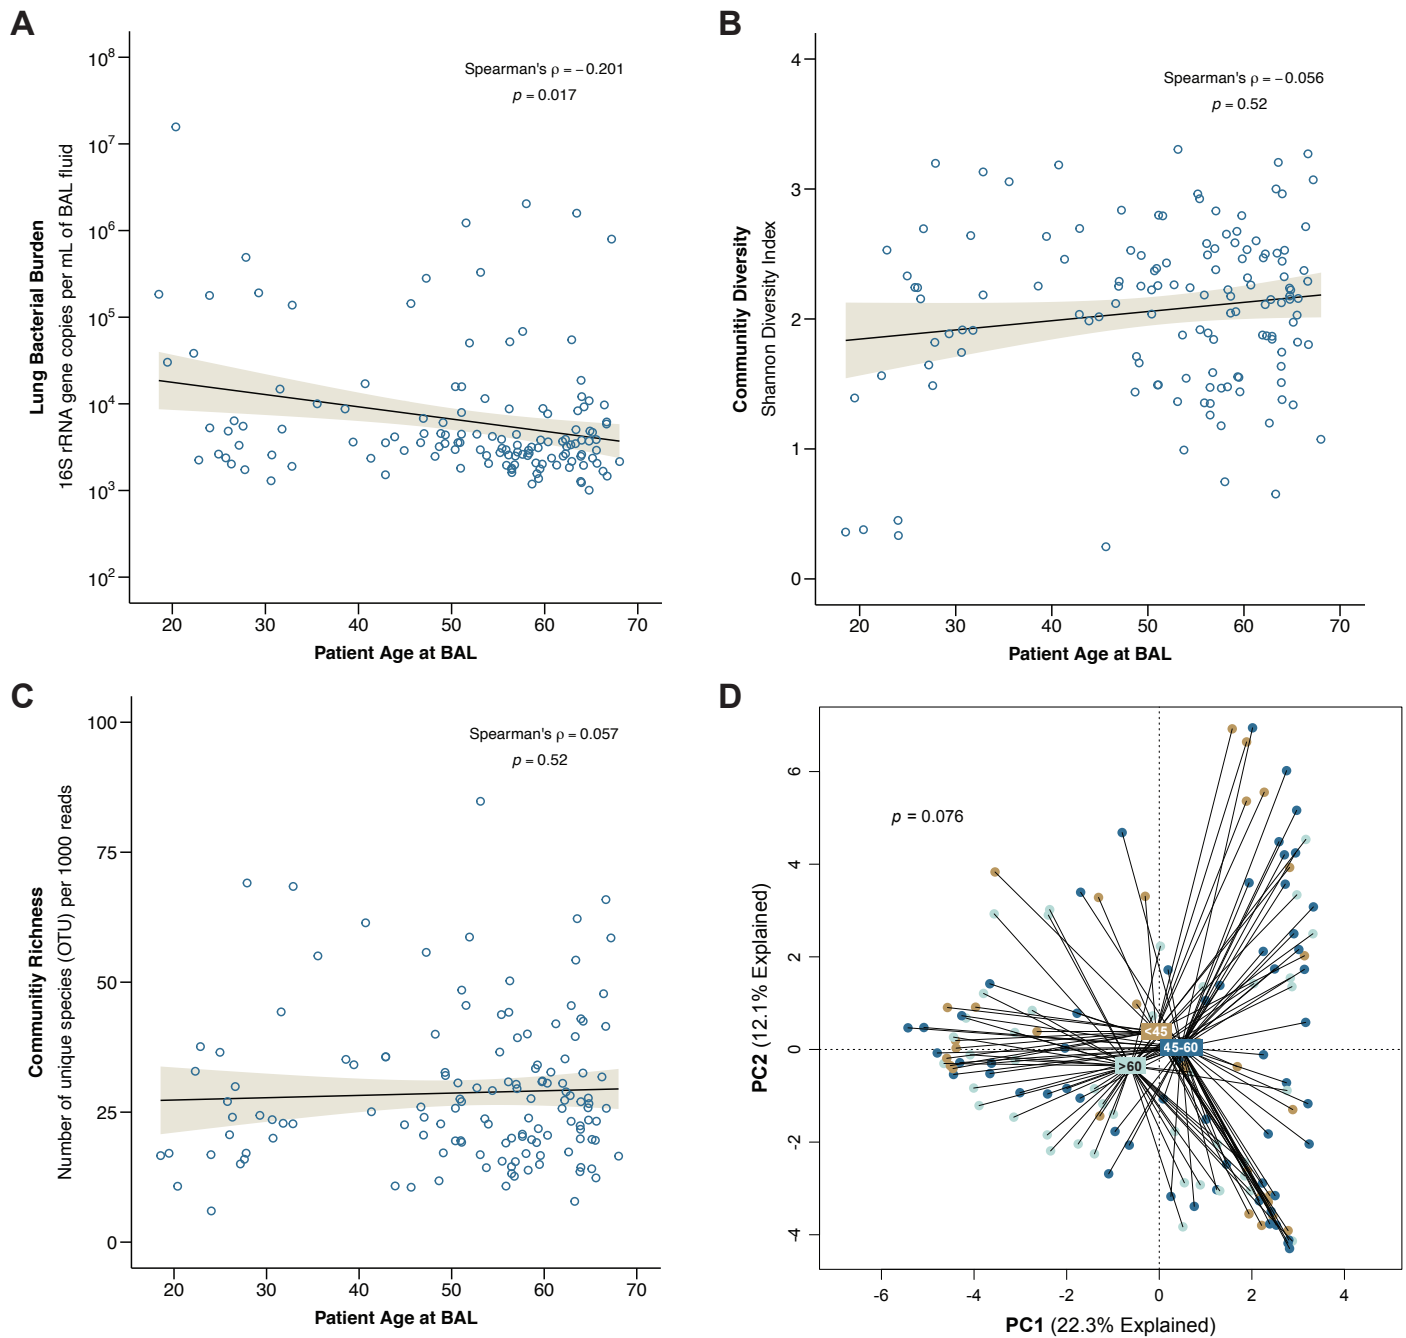

**Appendix Figure 5: Comparing respiratory microbiome characteristics on the basis of patient age.**

We compared the bacterial burden, community diversity, and community richness on the basis of patient age at the time of BAL. There was an inverse association between age and bacterial burden (A), but age was not correlated with community diversity (B), or community richness (C). To visualize differences in community composition, patients were grouped into those younger than 45 (N=32), between 45 and 60 (N=60), and older than 60 (N=42). There was no difference in community composition between patients when grouped by age (D). Hypothesis testing performed using Spearman's correlation (A-C) and *adonis* (D). Lines indicate best-fit linear regression, shaded areas indicate standard error (95% confidence level) (A-C).

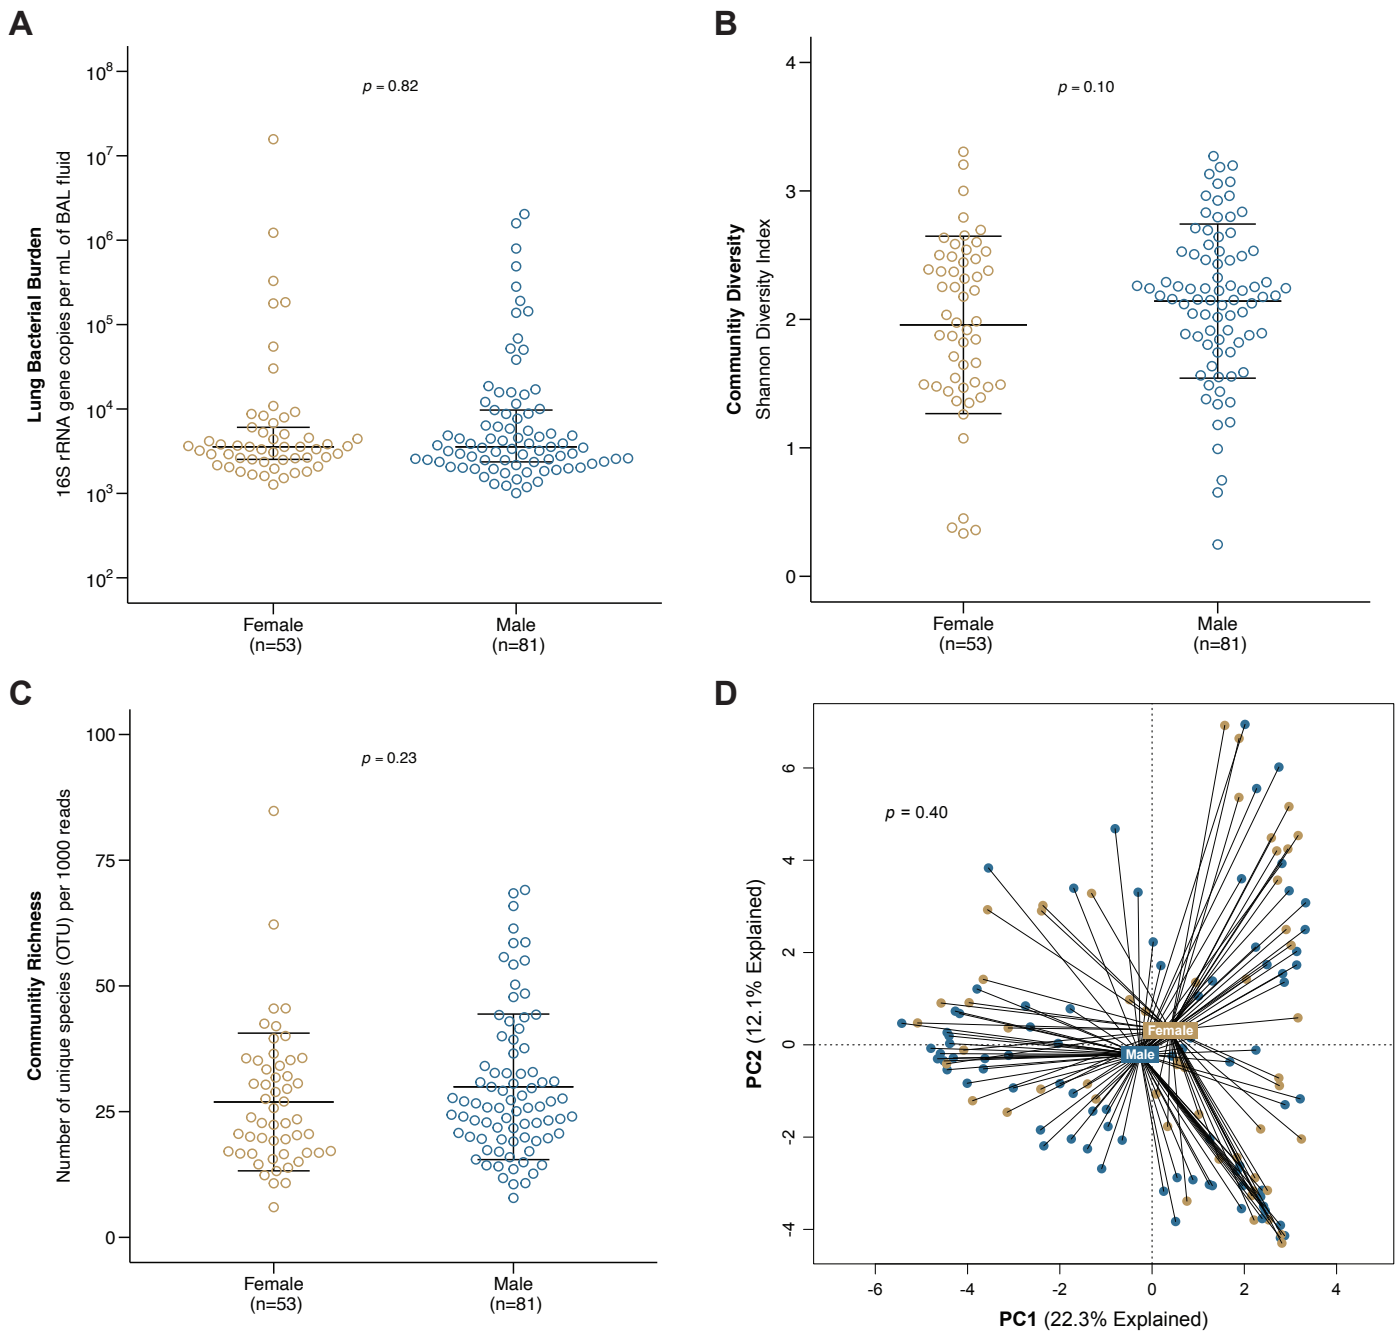

**Appendix Figure 6: Comparing respiratory microbiome characteristics on the basis of sex.**

We compared the bacterial burden, community diversity, community richness, and overall community composition between male (N=81) and female (N=53) patients undergoing one-year surveillance bronchoscopy. There was no difference in bacterial burden (A), community diversity (B), community richness (C), or community composition (D) on the basis of sex. Hypothesis testing performed using Wilcoxon rank-sum test (A), two-sample t test (B-C) and *adonis* (D). Lines indicate median and interquartile range (A) and mean  $\pm$  standard deviations (B-C).

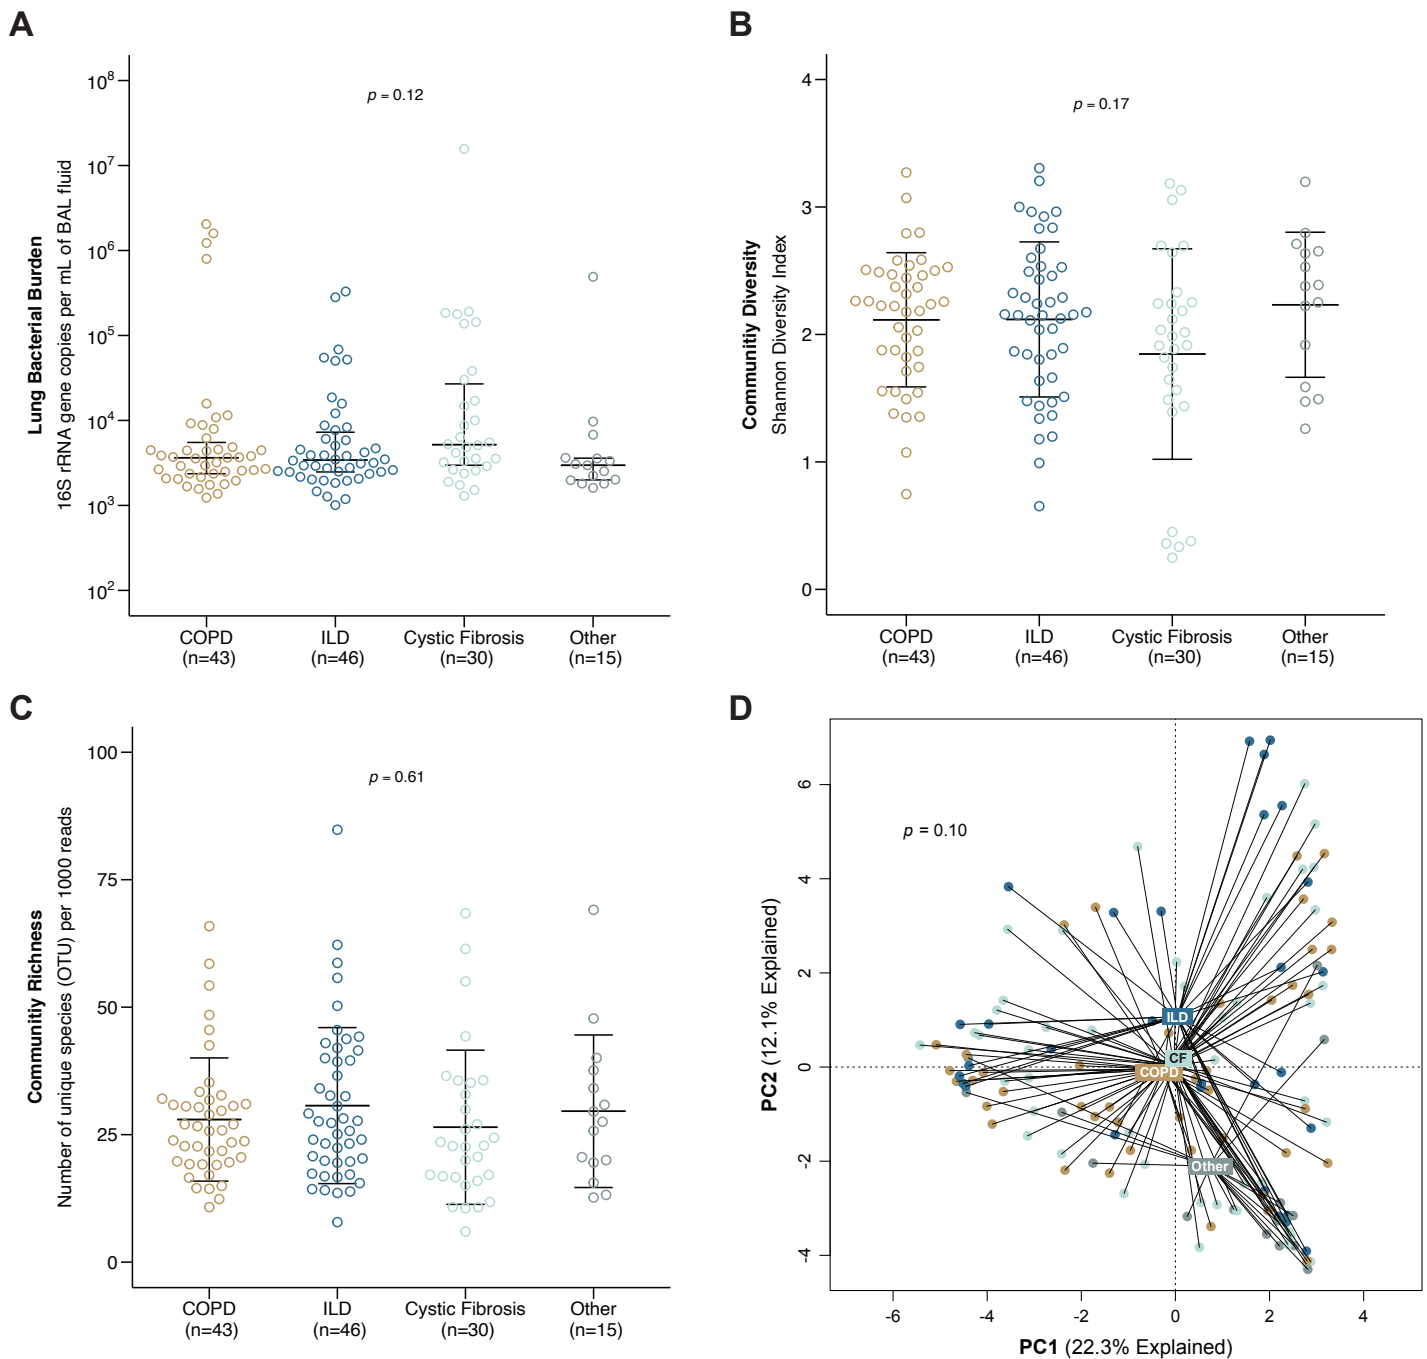

**Appendix Figure 7: Comparing respiratory microbiome characteristics on the basis of pre-transplant diagnosis.**

We compared the bacterial burden, community diversity, community richness, and overall community composition between patients who had a pre-transplant diagnosis of COPD/Emphysema (N=43), interstitial lung disease (N=46), cystic fibrosis (N=30), and other indications (N=15) who were undergoing one-year surveillance bronchoscopy. There was no difference in bacterial burden (A), community diversity (B), community richness (C), or community composition (D) on the basis of pre-transplant diagnosis. Hypothesis testing performed using Kruskal-Wallis test (A), one-way ANOVA (B-C), and *adonis* (D). Lines indicate median and interquartile range (A) and mean +/- standard deviations (B-C).

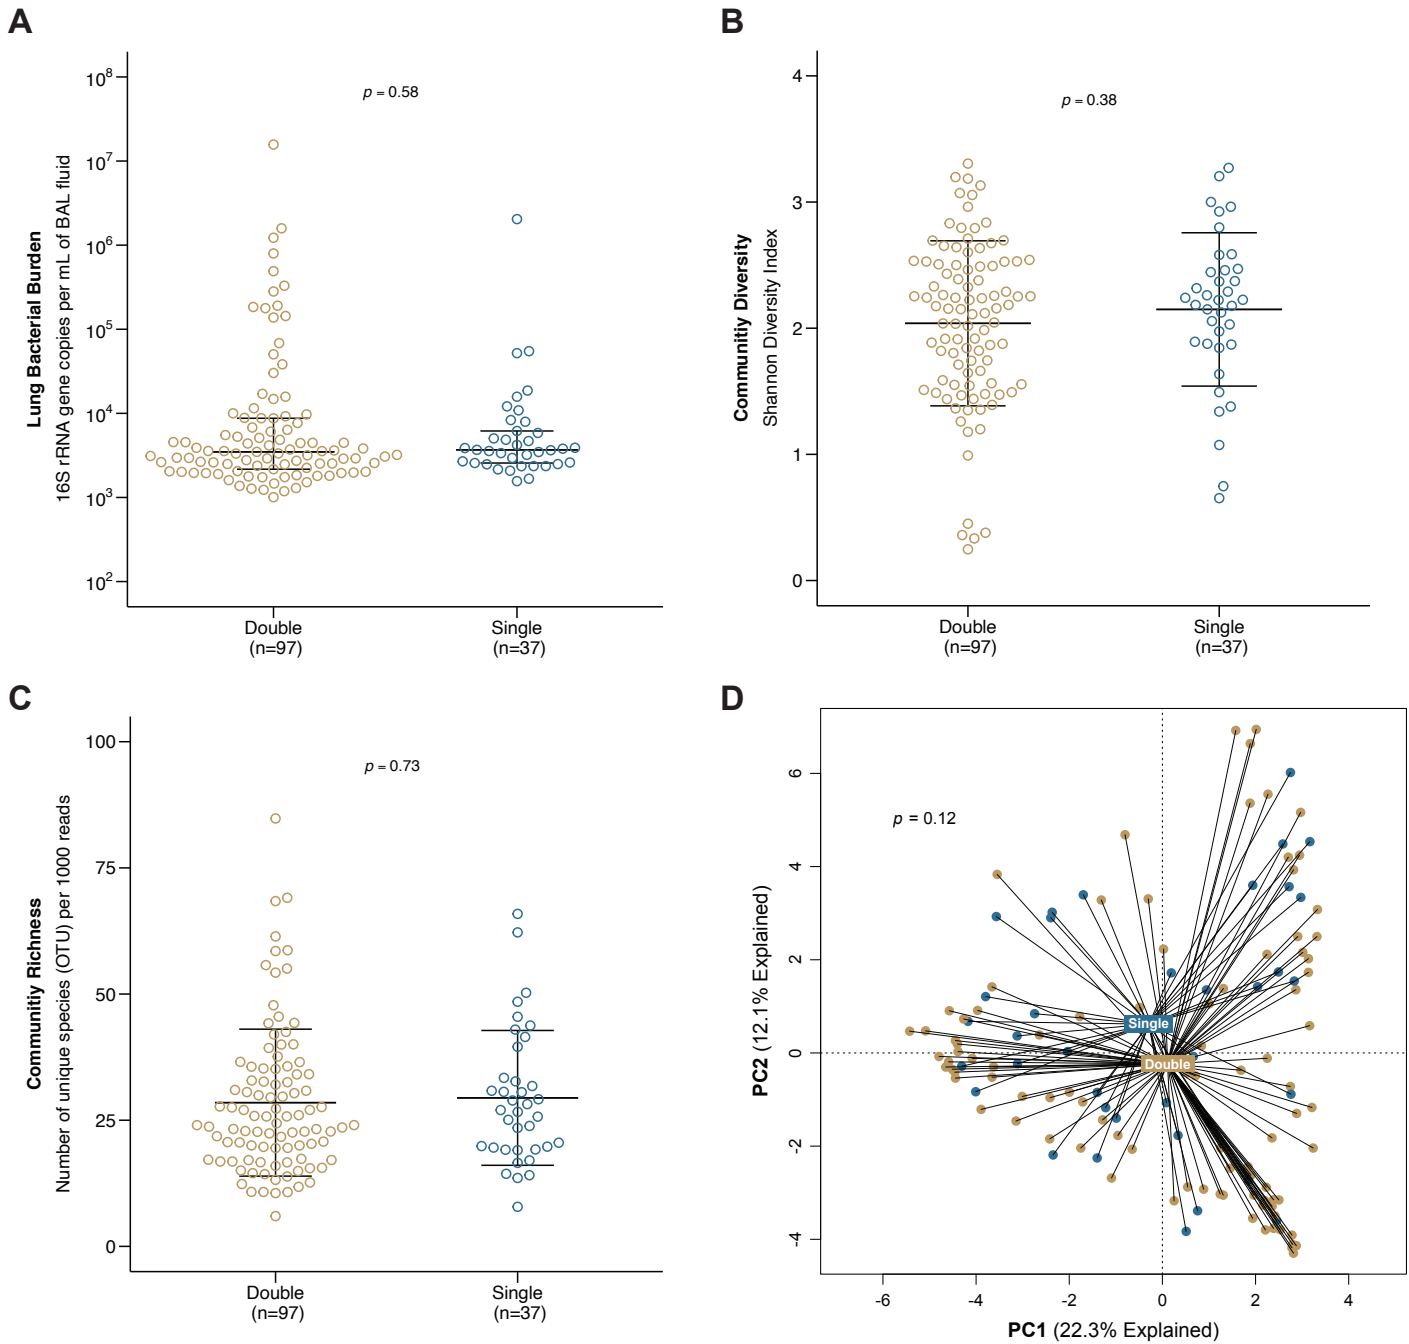

**Appendix Figure 8: Comparing respiratory microbiome characteristics on the basis of double vs. single lung transplant.**

We compared the bacterial burden, community diversity, community richness, and overall community composition between patients who received a double (N=97) vs. single (N=37) lung transplant recipients undergoing one-year surveillance bronchoscopy. There was no difference in bacterial burden (A), community diversity (B), community richness (C), or community composition (D) on the basis of double vs. single lung transplant. Hypothesis testing performed using Wilcoxon rank-sum test (A), two-sample t test (B-C) and *adonis* (D). Lines indicate median and interquartile range (A) and mean +/- standard deviations (B-C).



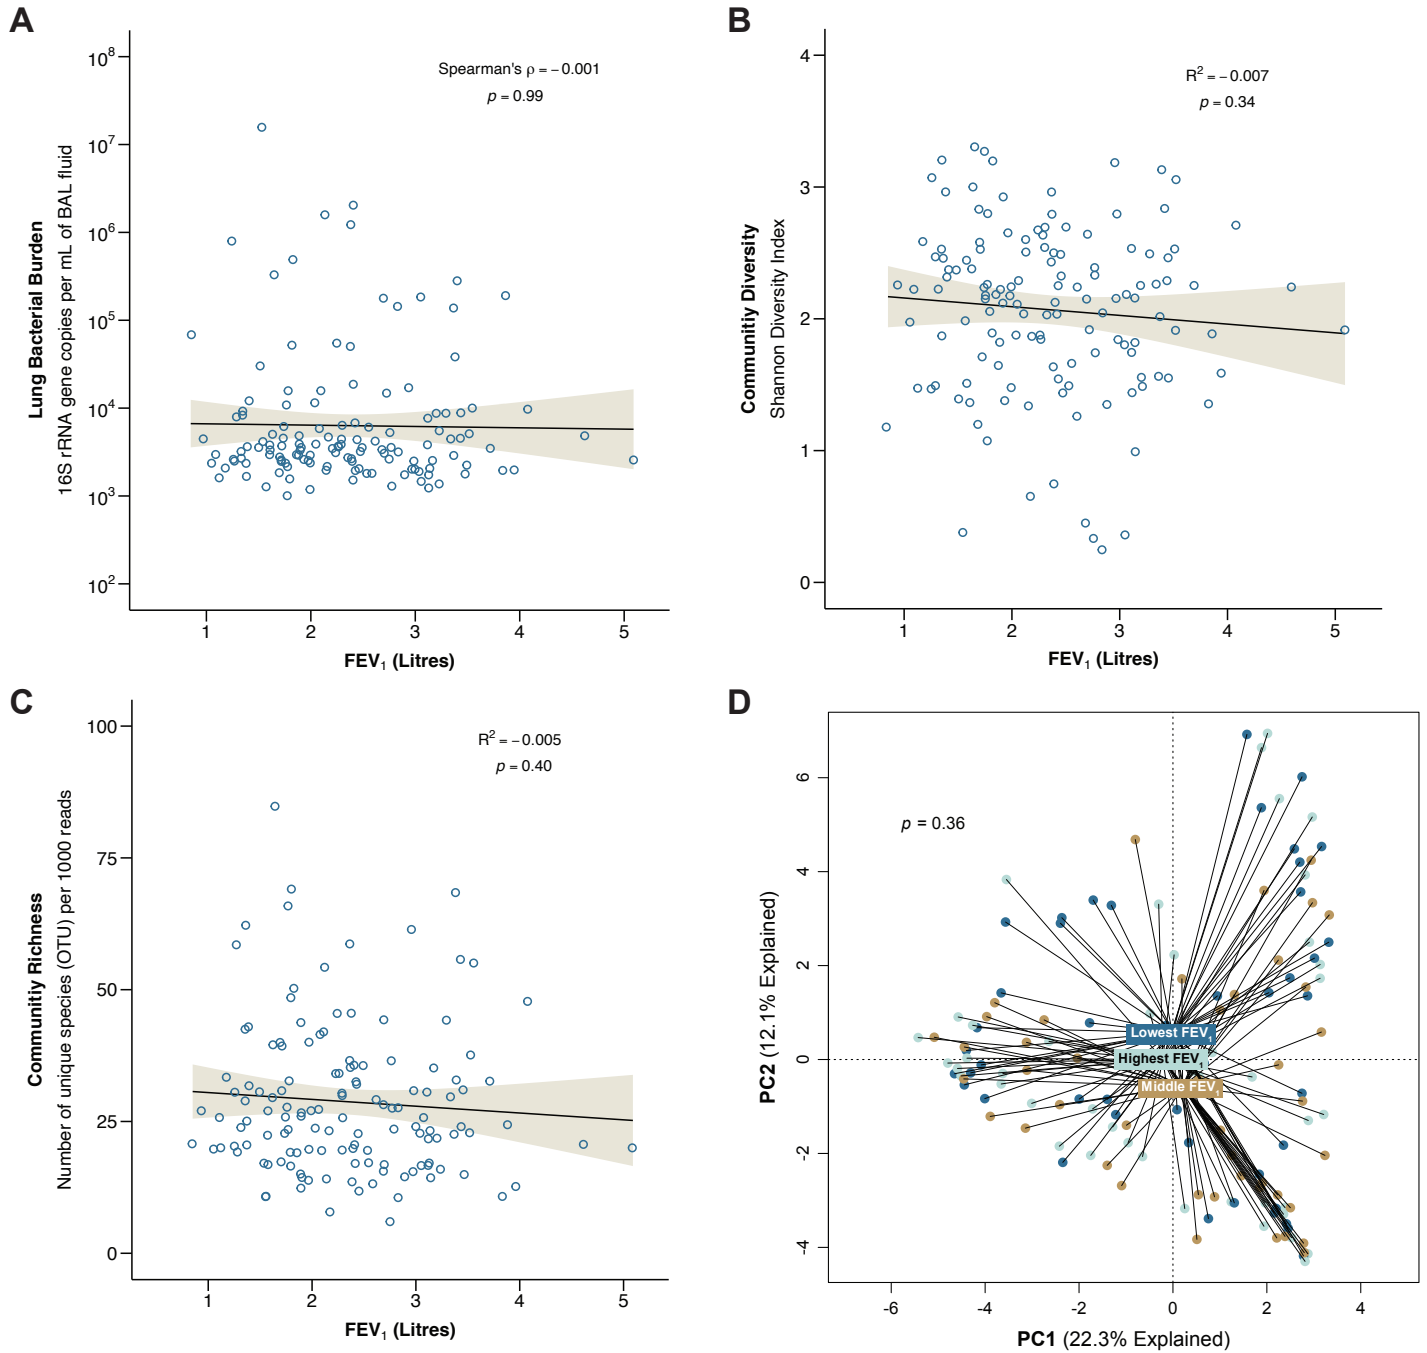

**Appendix Figure 9: Comparing respiratory microbiome characteristics on the basis of FEV<sub>1</sub> values.**

We compared the bacterial burden, community diversity, and community richness on the basis of patient's FEV<sub>1</sub> values in litres at the time of BAL. There was no association between FEV<sub>1</sub> values and bacterial burden (A), community diversity (B), or community richness (C). These analyses were unchanged when FEV<sub>1</sub> was analyzed as % predicted vs. litres. To visualize differences in community composition, patients were divided into tertiles of lowest (N=45), middle (N=45) and highest (N=44) FEV<sub>1</sub> values. There was no difference in community composition between patients when grouped by FEV<sub>1</sub> values (D). Hypothesis testing performed using Spearman's correlation (A), linear regression (B,C) and *adonis* (D). Lines indicate best-fit linear regression, shaded areas indicate standard error (95% confidence level) (A-C).

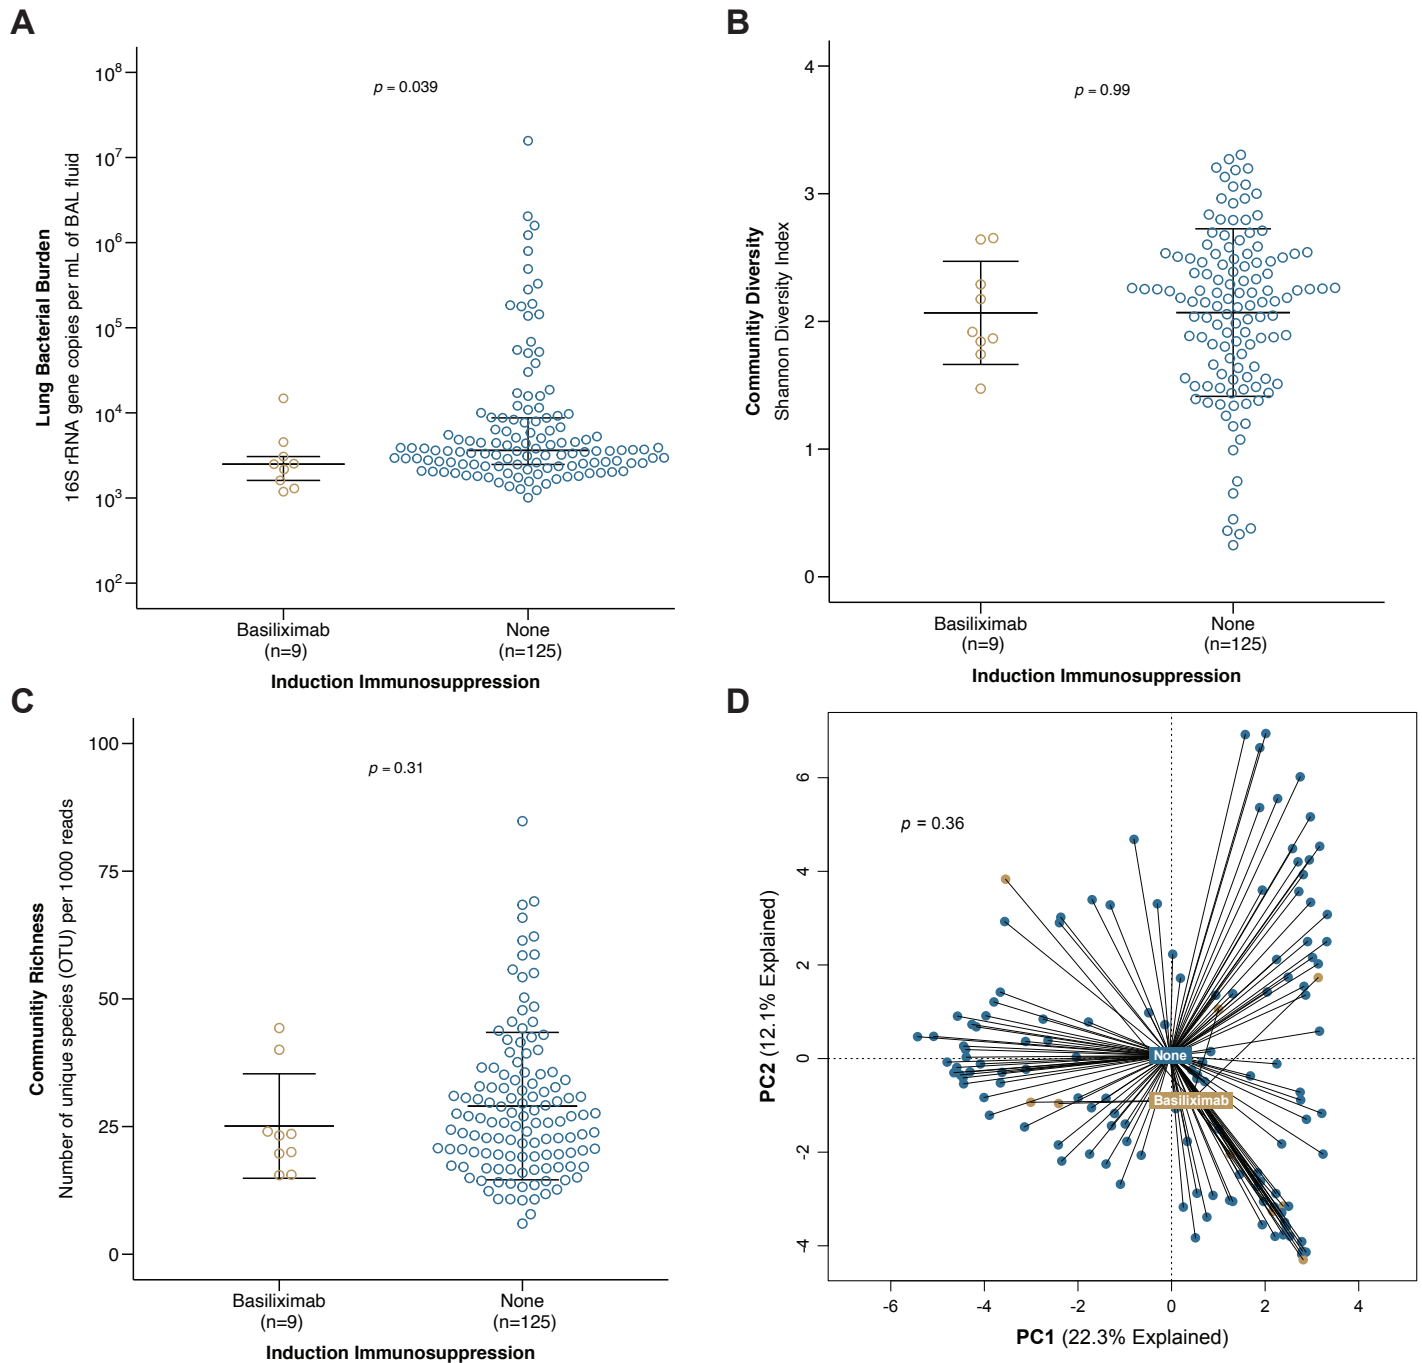

**Appendix Figure 10: Comparing respiratory microbiome characteristics on the basis of induction immunosuppression.**

We compared the bacterial burden, community diversity, community richness, and overall community composition between patients who received basiliximab for induction immunosuppression (N=9) vs. those who did not (N=125). Patients who received basiliximab for induction had lower bacterial burden than those who did not receive induction immunosuppression (A). Community diversity (B), community richness (C), and overall community composition (D) did not vary between patients who did and did not receive induction immunosuppression. Hypothesis testing performed using Wilcoxon rank-sum test (A), two-sample t test (B-C) and *adonis* (D). Lines indicate median and interquartile range (A) and mean  $\pm$  standard deviations (B-C).

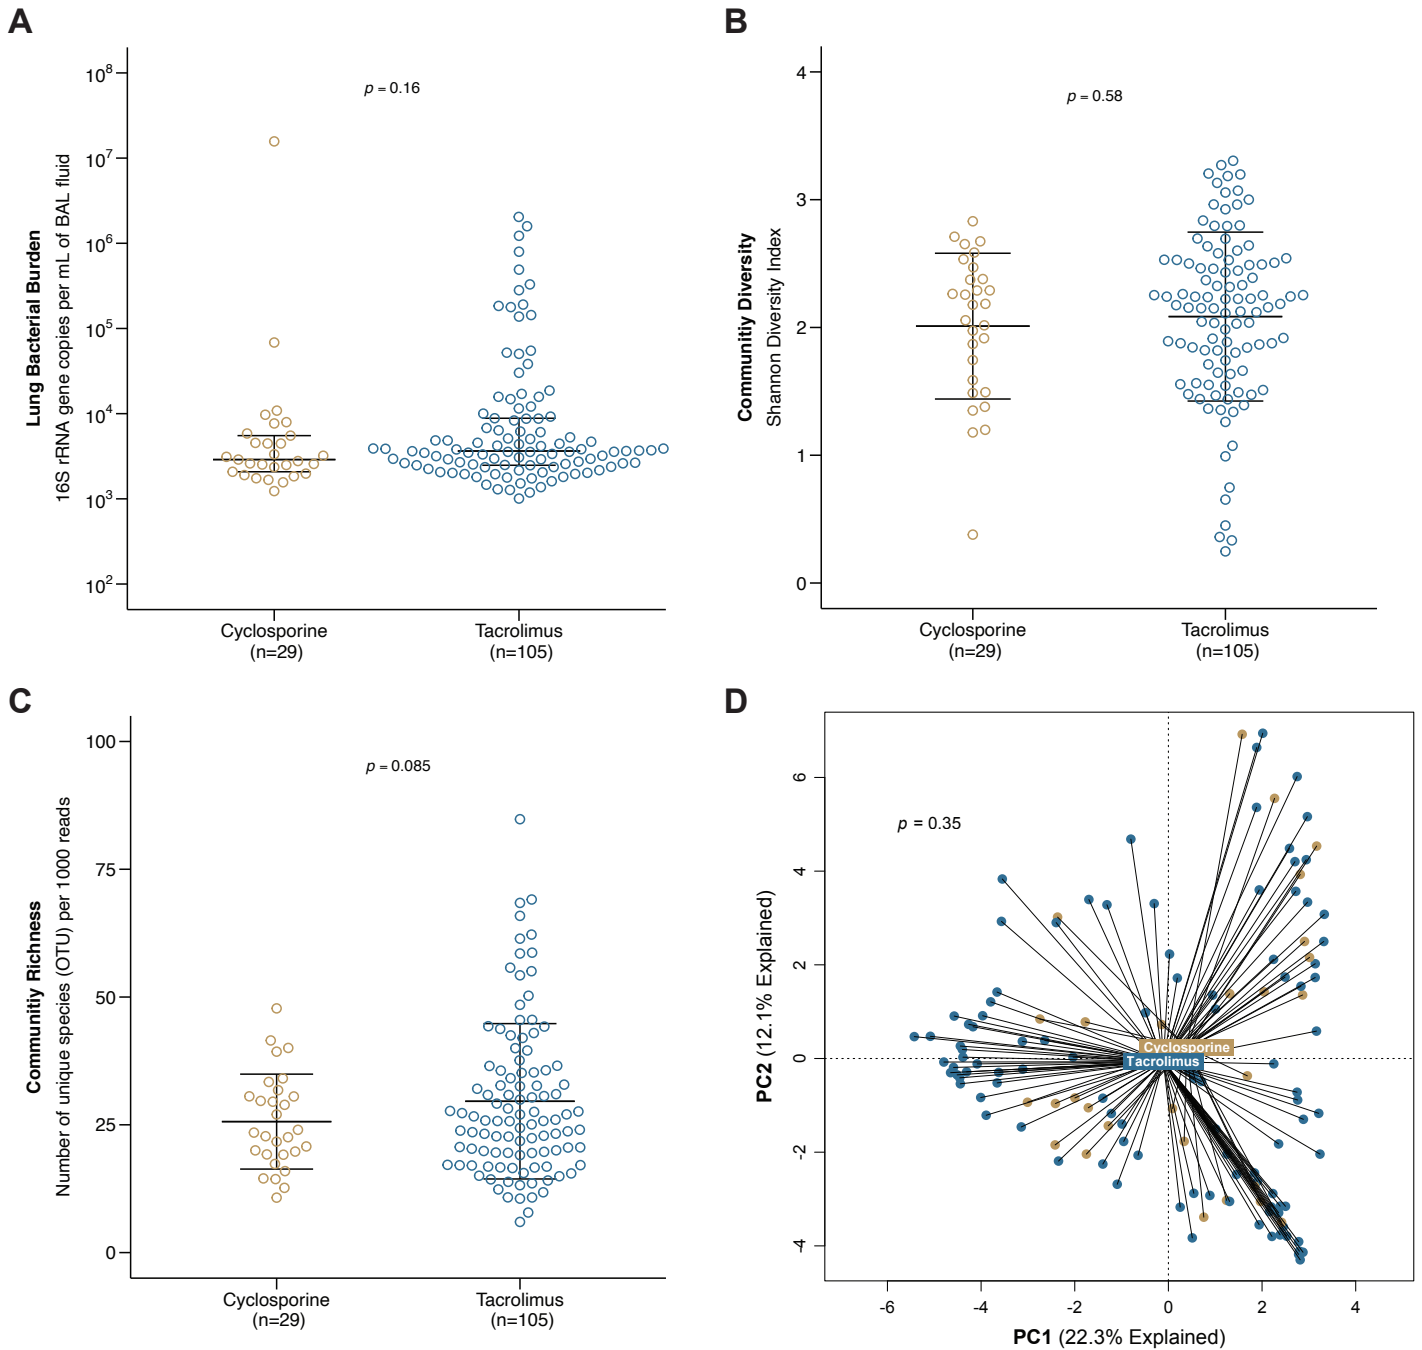

**Appendix Figure 11: Comparing respiratory microbiome characteristics on the basis of calcineurin inhibition regimen.**

We compared the bacterial burden, community diversity, community richness, and overall community composition between patients who were receiving cyclosporine (N=29) or tacrolimus (N=105) at the time of one-year surveillance bronchoscopy. There was no difference in bacterial burden (A), community diversity (B), community richness (C), or community composition (D) on the basis of pre-transplant diagnosis. Hypothesis testing performed using Wilcoxon rank-sum test (A), two-sample t test (B-C) and *adonis* (D). Lines indicate median and interquartile range (A) and mean  $\pm$  standard deviations (B-C).

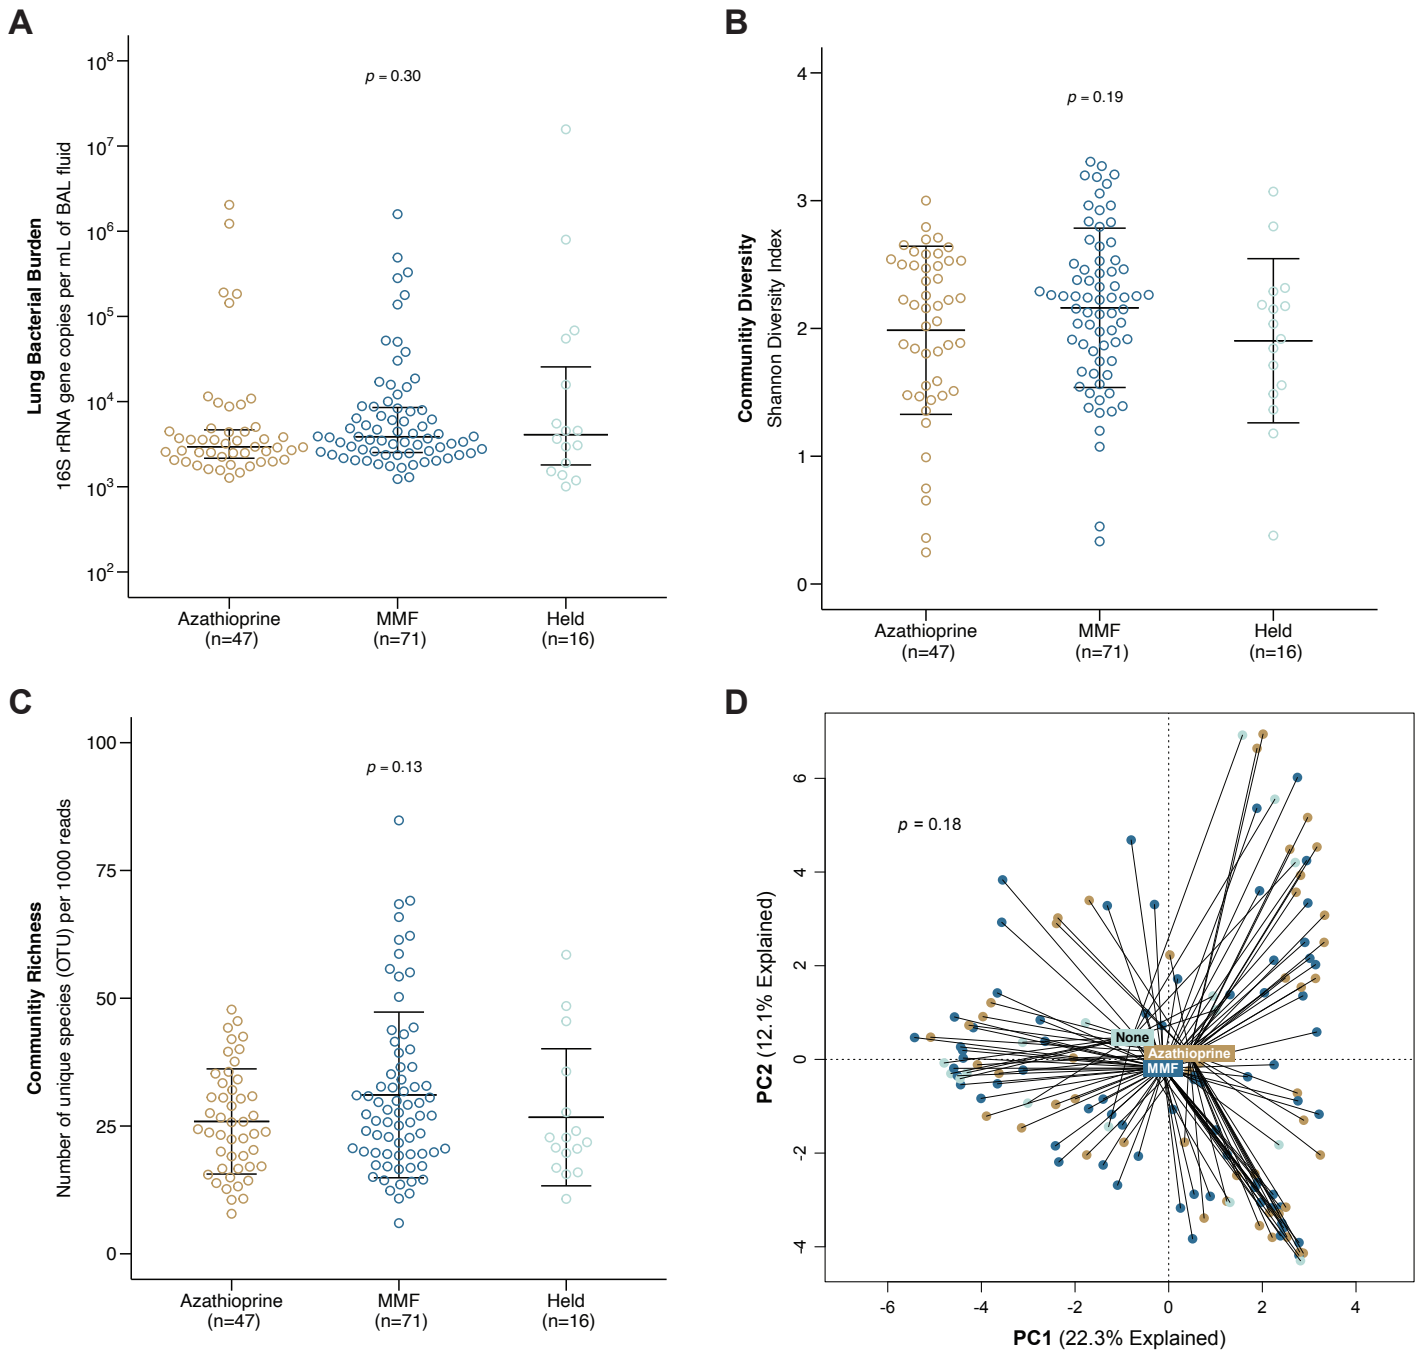

**Appendix Figure 12: Comparing respiratory microbiome characteristics on the basis of antiproliferative immunosuppression regimen.**

We compared the bacterial burden, community diversity, community richness, and overall community composition between patients receiving azathioprine (N=47), mycophenolate (N=72), and patients whose antiproliferative immunosuppression was held (N=15) at the time of one-year surveillance bronchoscopy. There was no difference in bacterial burden (A), community diversity (B), or community richness (C) on the basis of immunosuppression. Likewise, there was no difference in community composition identified on principle components analysis (D). Hypothesis testing performed using Kruskal-Wallis test (A), one-way ANOVA (B-C), and *adonis* (D). Lines indicate median and interquartile range (A) and mean  $\pm$  standard deviations (B-C).

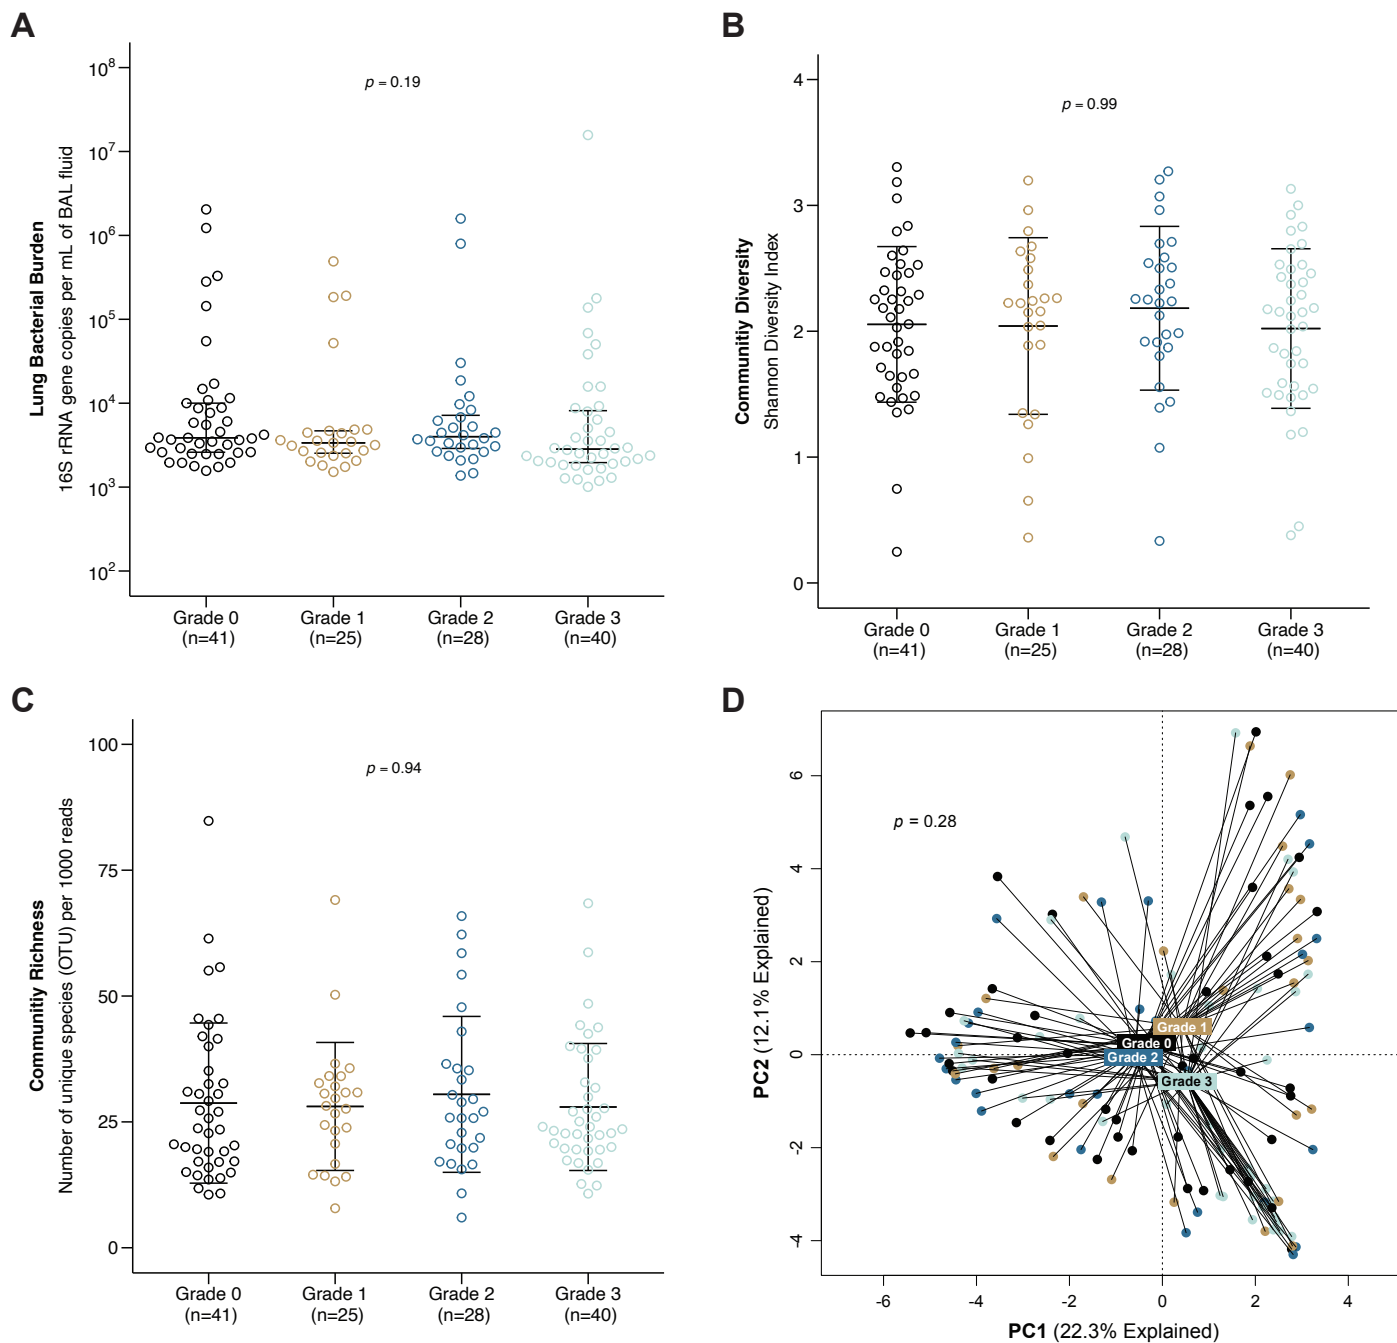

**Appendix Figure 13: Comparing respiratory microbiome characteristics on the basis of primary graft dysfunction immediately following lung transplantation.**

We compared the bacterial burden, community diversity, community richness, and overall community composition in BAL collected at one-year surveillance bronchoscopy between patients who had primary graft dysfunction (PGD) grade 0 (N=41), PGD grade 1 (N=25), PGD grade 2 (N=28), and PGD grade 3 (N=40) based evaluation immediately following lung transplantation. There was no difference in bacterial burden (A), community diversity (B), community richness (C), or overall community composition (D) on the basis of PGD history. Hypothesis testing performed using Kruskal-Wallis test (A), one-way ANOVA (B-C), and *adonis* (D). Lines indicate median and interquartile range (A) and mean +/- standard deviations (B-C).

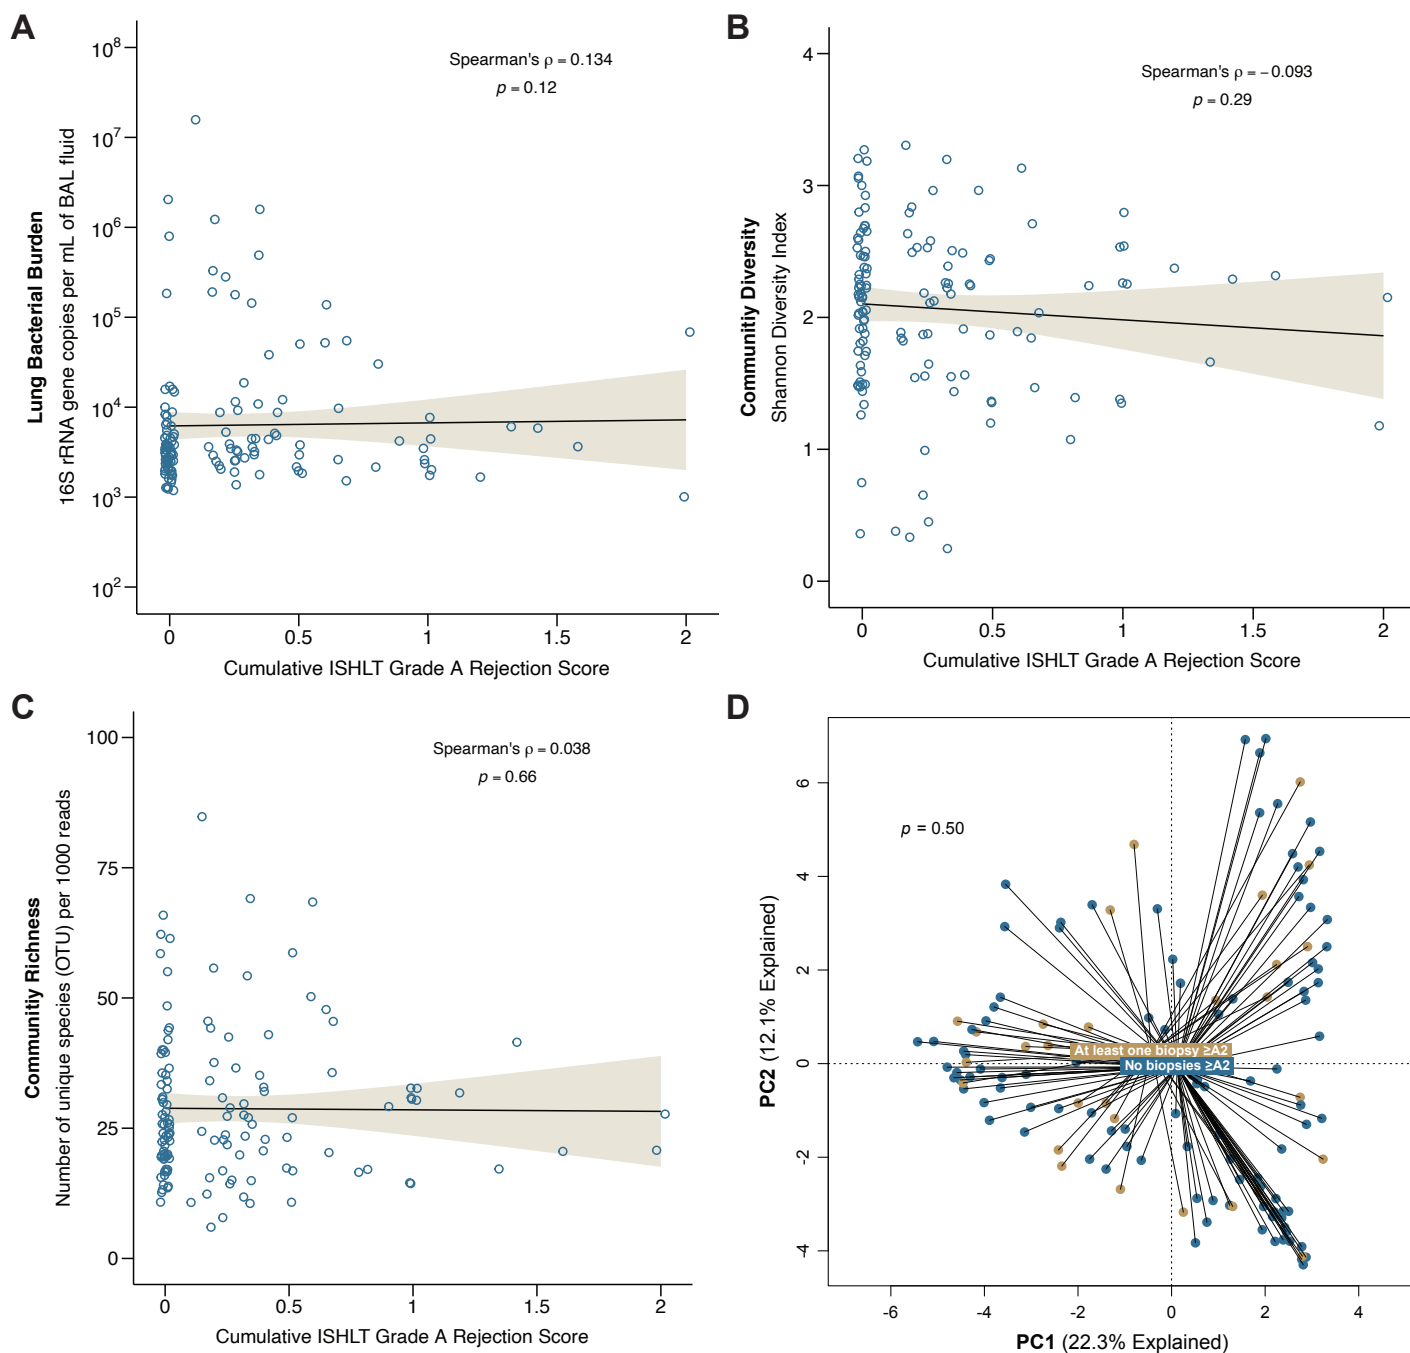

**Appendix Figure 14: Comparing respiratory microbiome characteristics on the basis of biopsy-proven acute cellular rejection episodes.**

We compared the bacterial burden, community diversity, and community richness on the basis of cumulative ISHLT Grade A Rejection score (calculated by adding the ordinal values of each biopsy specimen's A score divided by the total number of biopsies performed in the first year post-transplant). There was association between cumulative ISHLT grade A rejection score and bacterial burden (A), community diversity (B), or community richness (C). To visualize differences in community composition, patients were grouped as either having no biopsies with a score of A2 or higher (N=105) or at least one biopsy with a score of A2 (N=29). There was no difference in community composition between patients who had had biopsy-proven high-grade acute cellular rejection and those who had not (D). Hypothesis testing performed using Spearman's correlation (A-C) and *adonis* (D). Lines indicate best-fit linear regression, shaded areas indicate standard error (95% confidence level) (A-C).

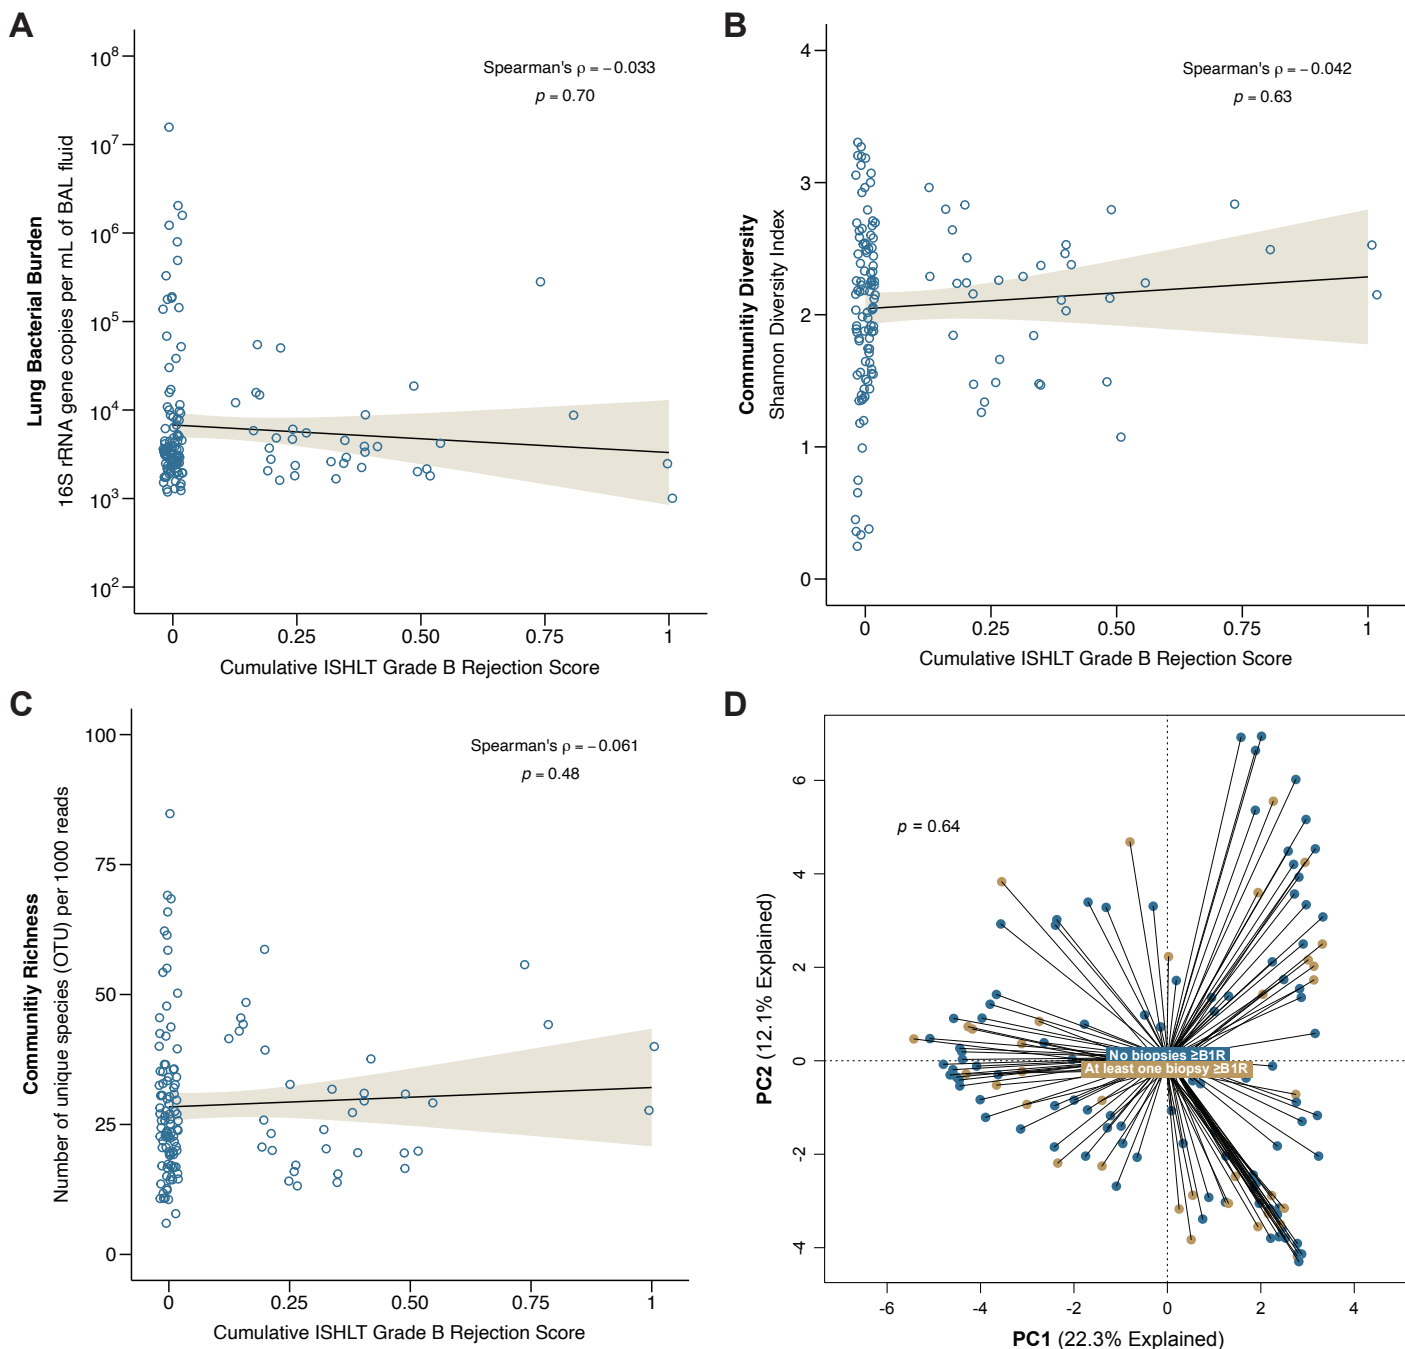

**Appendix Figure 15: Comparing respiratory microbiome characteristics on the basis of biopsy-proven lymphocytic bronchiolitis episodes.**

We compared the bacterial burden, community diversity, and community richness on the basis of cumulative ISHLT Grade B Rejection score (calculated by adding the ordinal values of each biopsy specimen's B score divided by the total number of biopsies performed in the first year post-transplant). There was no association between cumulative ISHLT grade B rejection score and bacterial burden (A), community diversity (B), or community richness (C). To visualize differences in community composition, patients were grouped as either having no biopsies with a score of B1R or higher (N=99) or at least one biopsy with a score of B1R (N=35). There was no difference in community composition between patients who had had any episodes of biopsy-proven lymphocytic bronchiolitis and those who had not (D). Hypothesis testing performed using Spearman's correlation (A-C) and *adonis* (D). Lines indicate best-fit linear regression, shaded areas indicate standard error (95% confidence level) (A-C).

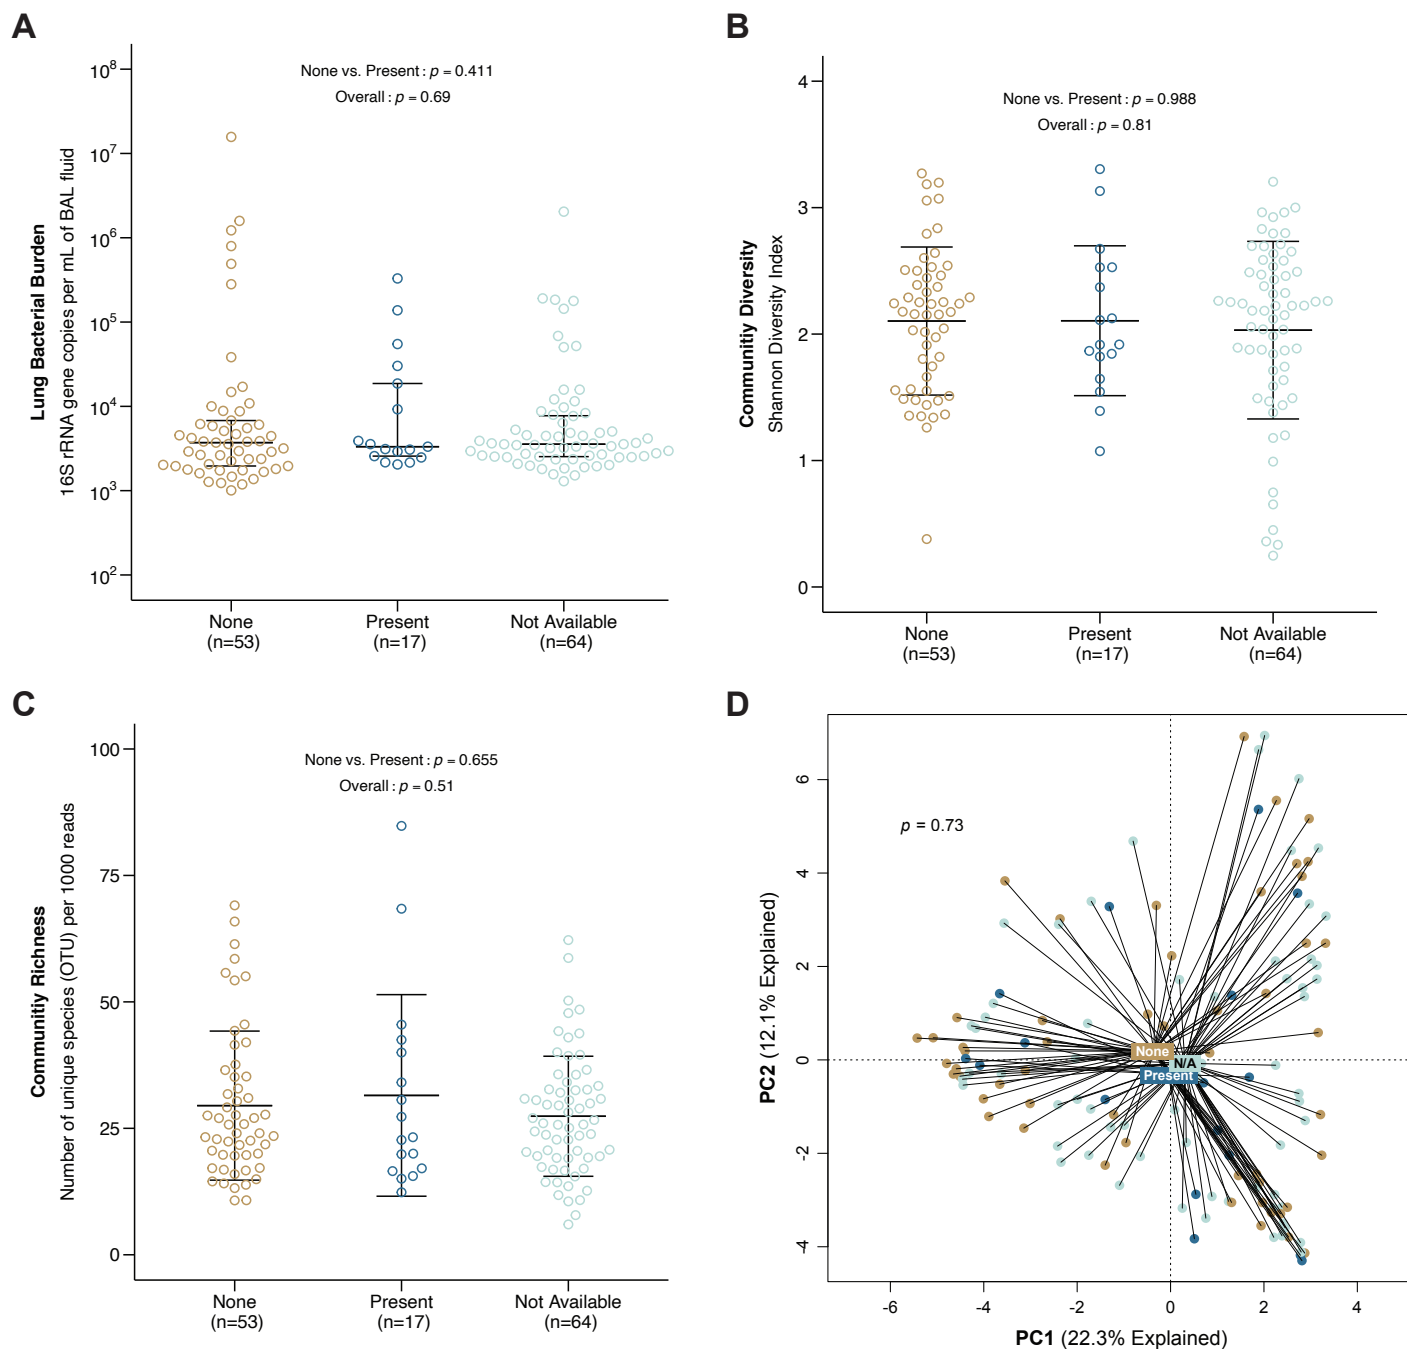

**Appendix Figure 16: Comparing respiratory microbiome characteristics on the basis of donor specific antibody presence.**

We compared the bacterial burden, community diversity, community richness, and overall community composition in BAL collected at one-year surveillance bronchoscopy between patients who had evidence of donor specific antibodies (N=), no donor specific antibodies (N=) and patients for whom no donor specific antibody evaluation was available (N=64). There was no difference in bacterial burden (A), community diversity (B), community richness (C), or overall community composition (D) on the basis of donor specific antibody presence. Hypothesis testing performed using Wilcoxon rank-sum test (None vs. Present) and Kruskal-Wallis test (Overall) (A), two-sample t test (None vs. Present) and one-way ANOVA (Overall) (B-C), and *adonis* (D). Lines indicate median and interquartile range (A) and mean  $\pm$  standard deviations (B-C).



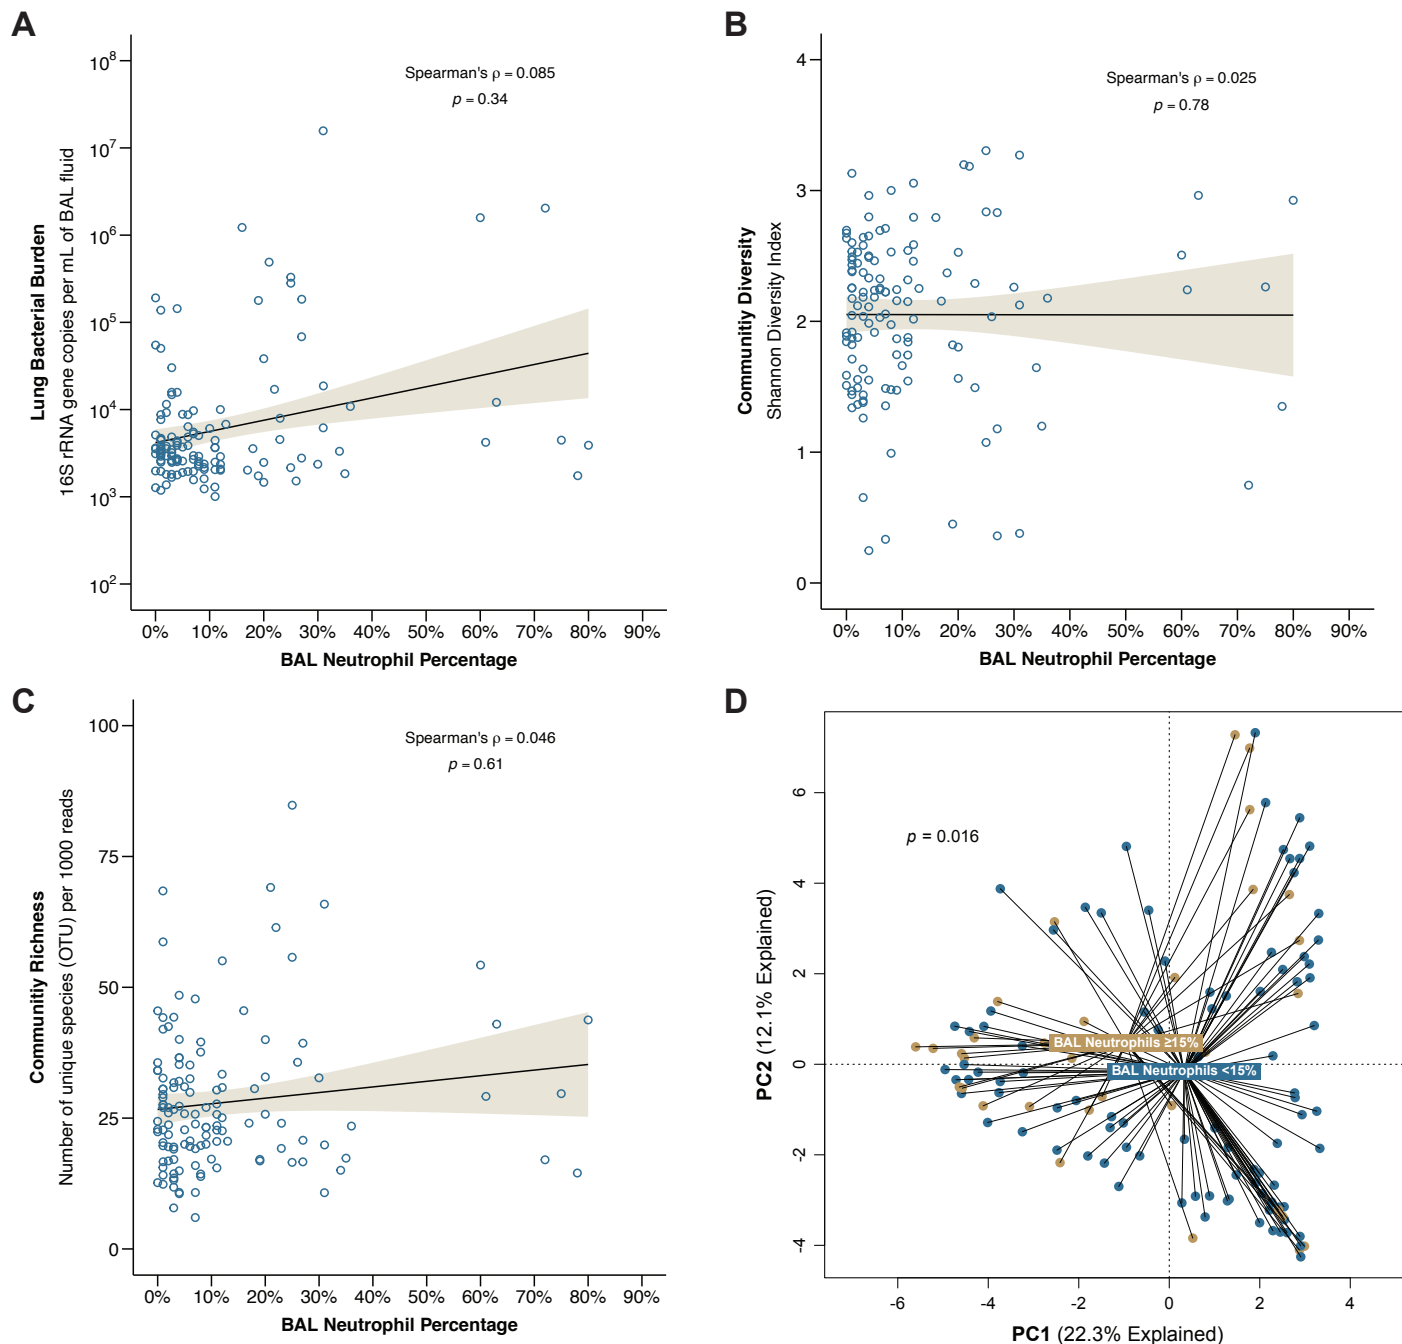

**Appendix Figure 17: Comparing respiratory microbiome characteristics on the basis of BAL neutrophil percentage.**

We compared the bacterial burden, community diversity, and community richness on the basis of BAL neutrophil percentage in the one-year post-transplant surveillance bronchoscopy. There was no association between BAL neutrophil percentage and bacterial burden (A), community diversity (B), or community richness (C). To visualize differences in community composition, samples were classified as having  $\geq 15\%$  neutrophils (N=33) or  $< 15\%$  neutrophils (N=96). There was a difference in community composition between patients when categorized according to  $\geq 15\%$  vs.  $< 15\%$  BAL neutrophils (this difference was not observed when BAL neutrophil percent was analyzed as a continuous variable,  $p=0.123$ ) (D). Hypothesis testing performed using Spearman's correlation (A-C) and *adonis* (D). Lines indicate best-fit linear regression, shaded areas indicate standard error (95% confidence level) (A-C).

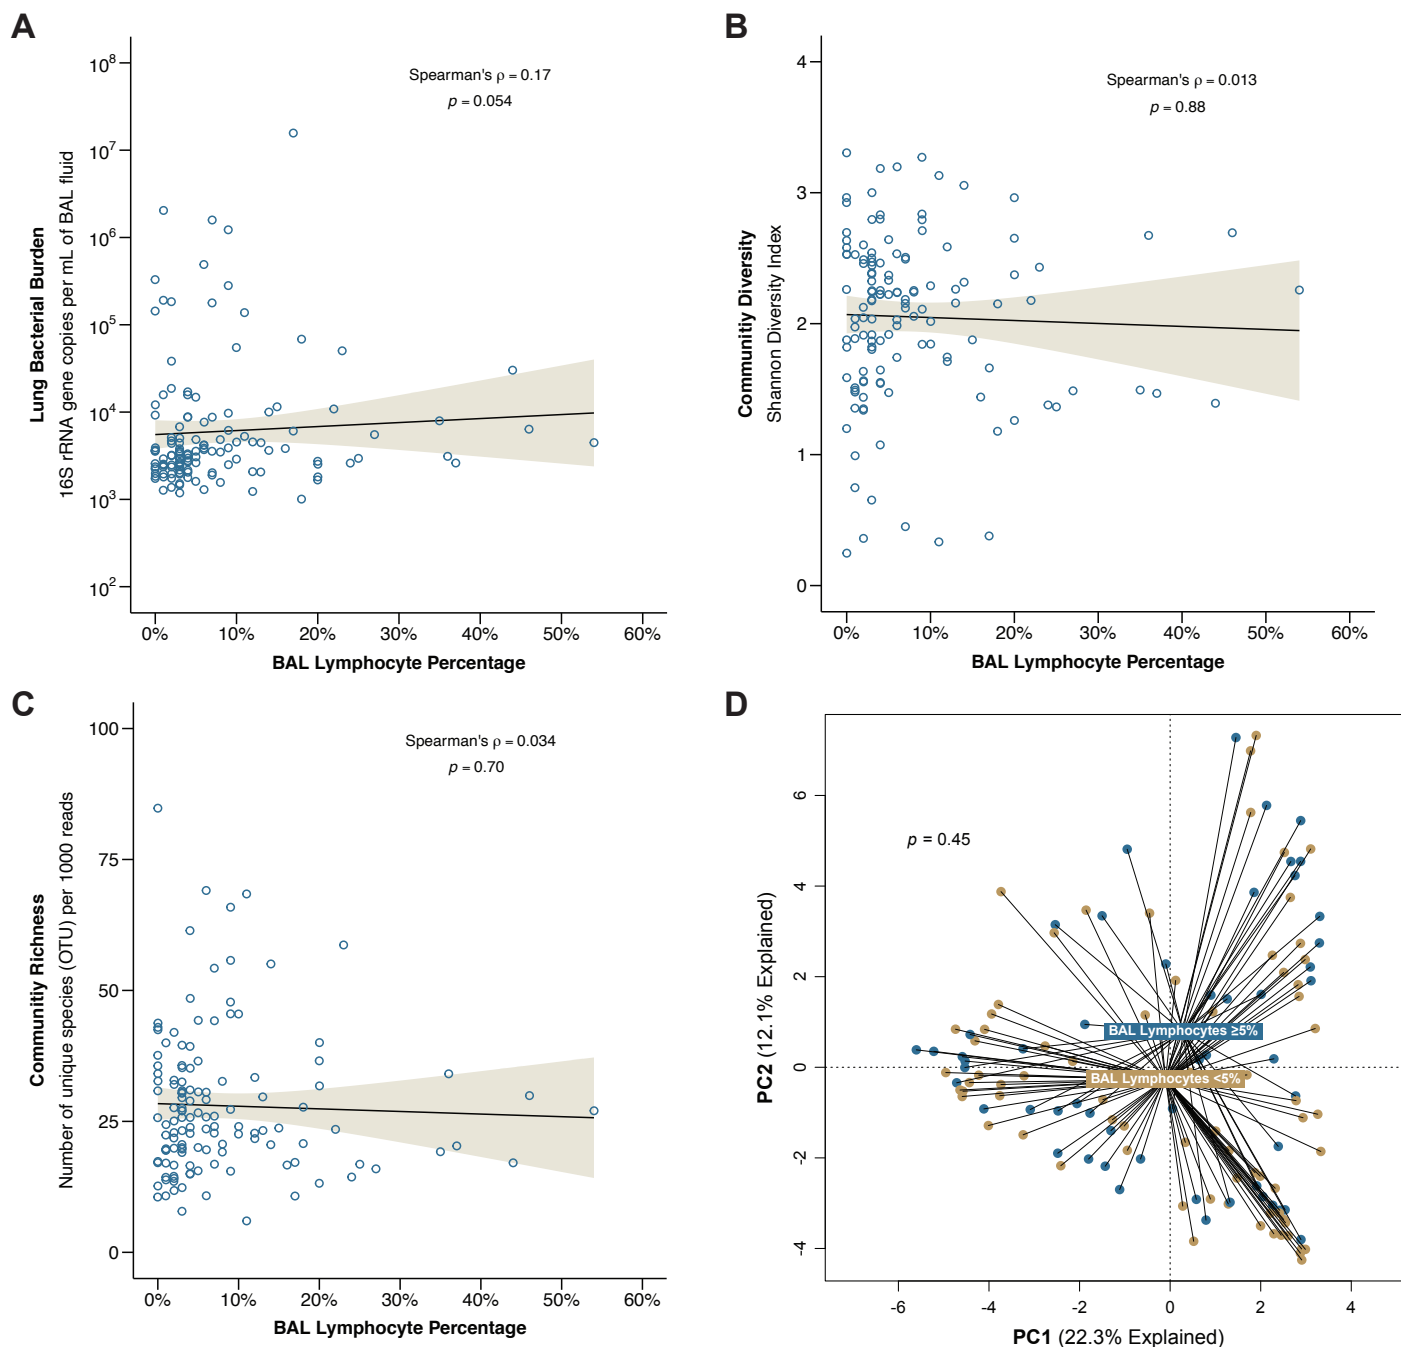

**Appendix Figure 18: Comparing respiratory microbiome characteristics on the basis of BAL lymphocyte percentage.**

We compared the bacterial burden, community diversity, and community richness on the basis of BAL lymphocyte percentage in the one-year post-transplant surveillance bronchoscopy. There was no association between BAL lymphocyte percentage and bacterial burden (A), community diversity (B), or community richness (C). To visualize differences in community composition, samples were classified as having  $>5\%$  lymphocytes ( $N=96$ ) or  $\leq 5\%$  lymphocytes ( $N=33$ ). There was no difference in community composition between patients with  $>5\%$  vs.  $\leq 5\%$  BAL lymphocytes (D). Hypothesis testing performed using Spearman's correlation (A-C) and *adonis* (D). Lines indicate best-fit linear regression, shaded areas indicate standard error (95% confidence level) (A-C).

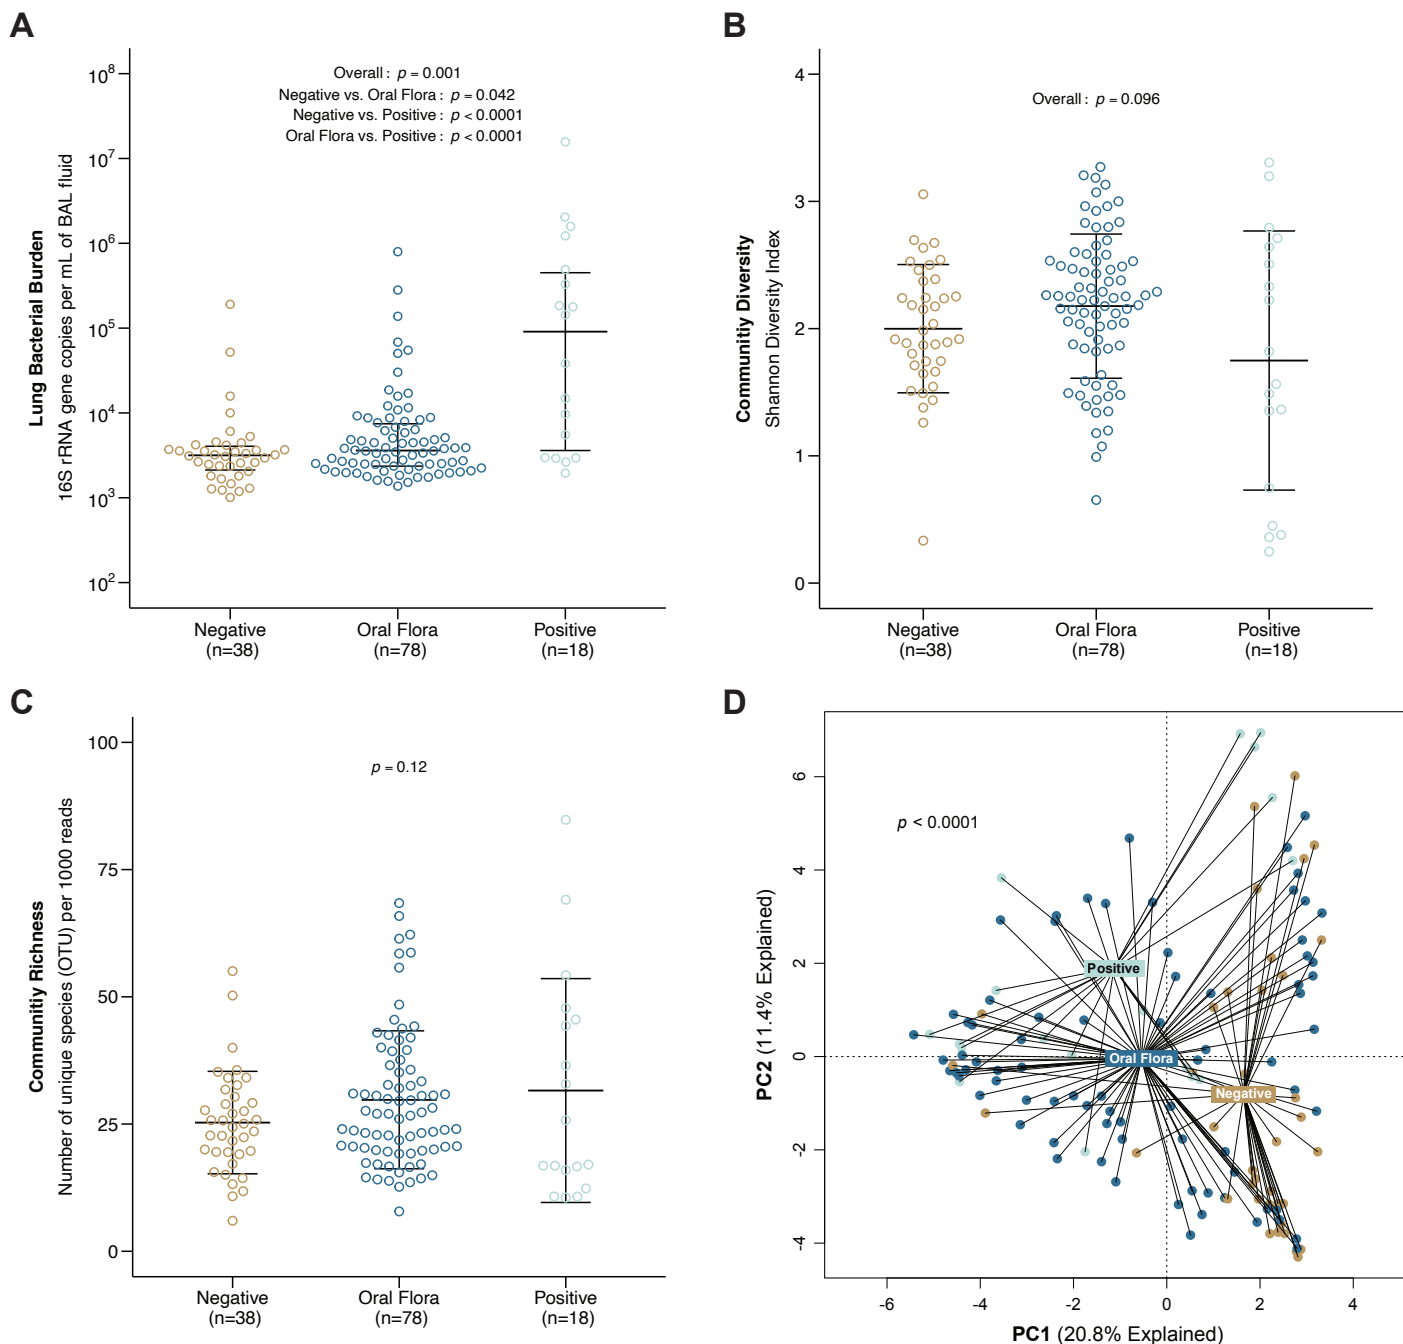

**Appendix Figure 19: Comparing respiratory microbiome characteristics on the basis of a current respiratory culture results.**

We compared the bacterial burden, community diversity, community richness, and overall community composition among BAL from one-year surveillance bronchoscopy on the basis of culture results. Relative to BAL with negative cultures, BAL with cultures showing oral flora had higher bacterial burden, and BAL with cultures positive for pathogenic bacteria had higher bacterial burden than BAL with negative cultures and BAL with cultures showing oral flora (A). Community diversity (B) and community richness (C) did not vary based on BAL culture results. Overall community composition (D), however, did differ on the basis of current culture BAL culture results. Hypothesis testing performed using Kruskal-Wallis test (A), one-way ANOVA (B-C), and *adonis* (D). Lines indicate median and interquartile range (A) and mean  $\pm$  standard deviations (B-C).

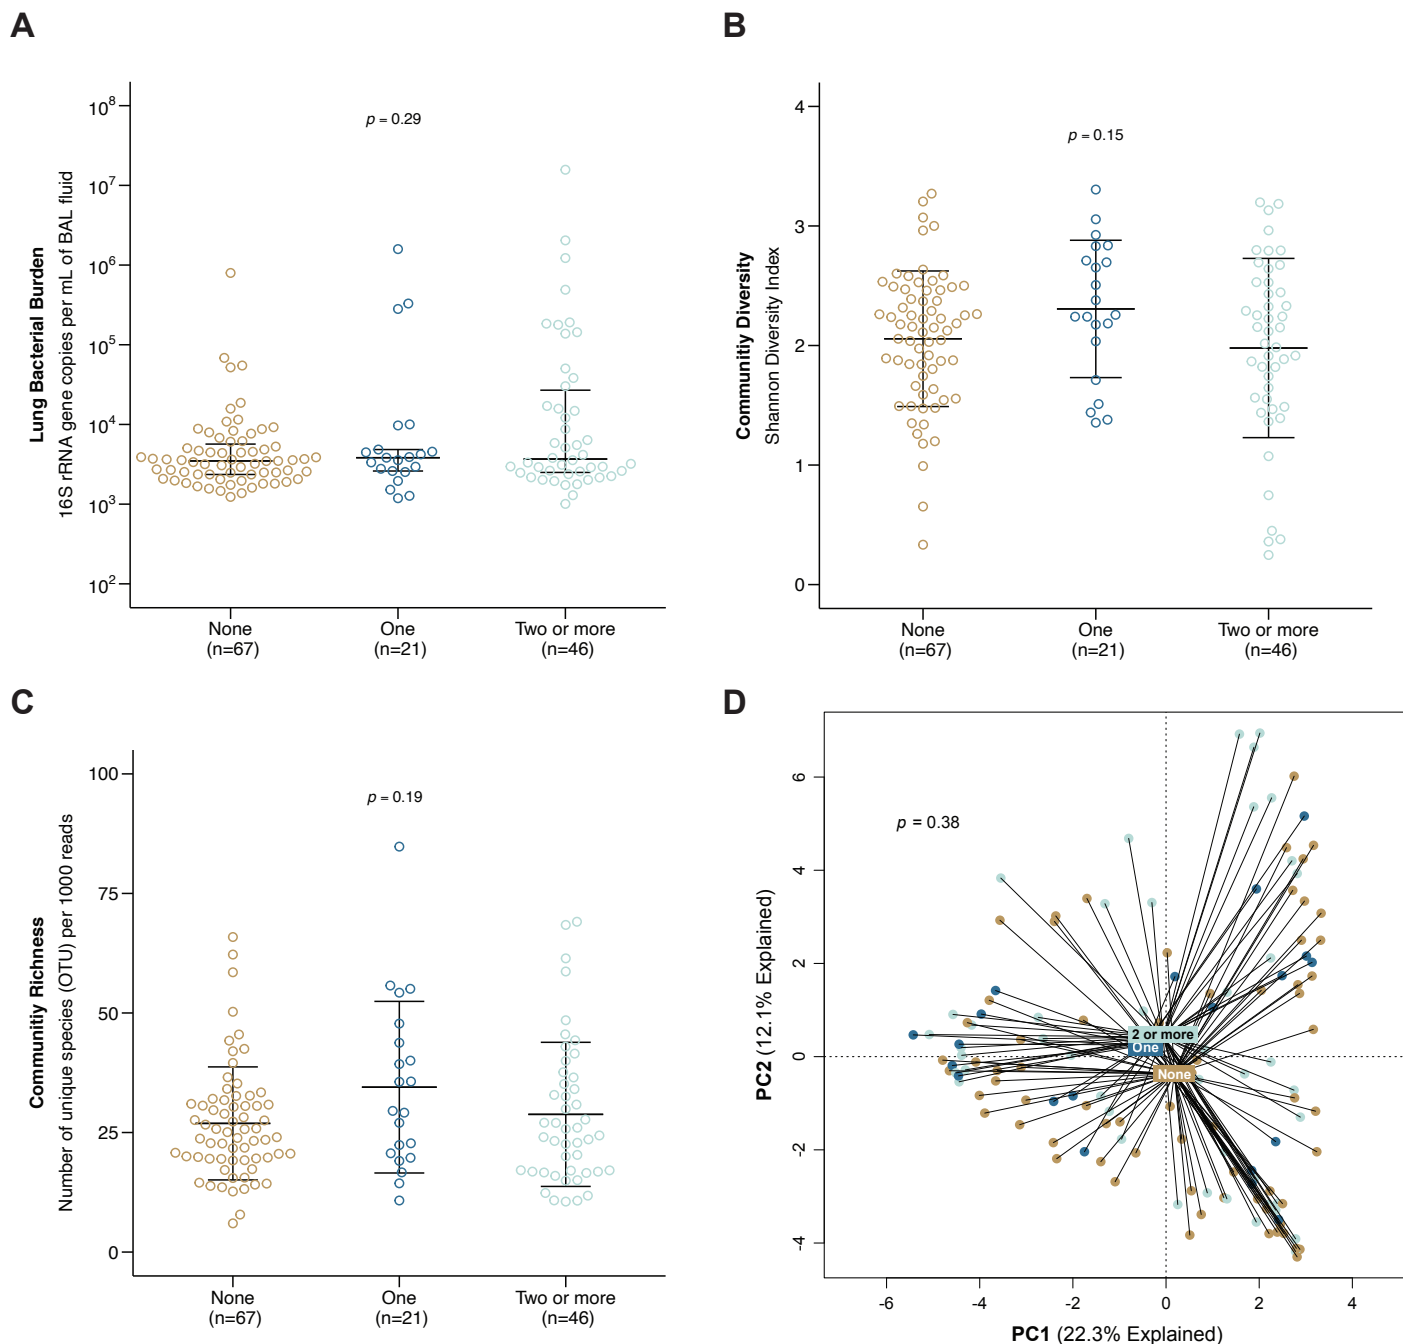

**Appendix Figure 20: Comparing respiratory microbiome characteristics on the basis of prior positive respiratory cultures.**

We compared the bacterial burden, community diversity, community richness, and overall community composition in BAL collected at one-year surveillance bronchoscopy between patients who had no BAL with bacterial cultures positive for pathologic bacteria in the first year after transplant (N=89), patients who had one BAL with pathologic bacteria subsequent to transplant (N=26), and patients who had two or more BAL with cultures positive for pathologic bacteria (N=19). Of note, 18 patients had a pathologic bacteria isolated on their one-year surveillance BAL; of these, 4 were the only positive culture in the first year after transplant and 14 had at least one other BAL culture positive for pathologic bacteria. There was no difference in bacterial burden (A), community diversity (B), community richness (C), or overall community composition (D) on the basis of a history of positive respiratory cultures. Hypothesis testing performed using Kruskal-Wallis test (A), one-way ANOVA (B-C), and *adonis* (D). Lines indicate median and interquartile range (A) and mean +/- standard deviations (B-C).

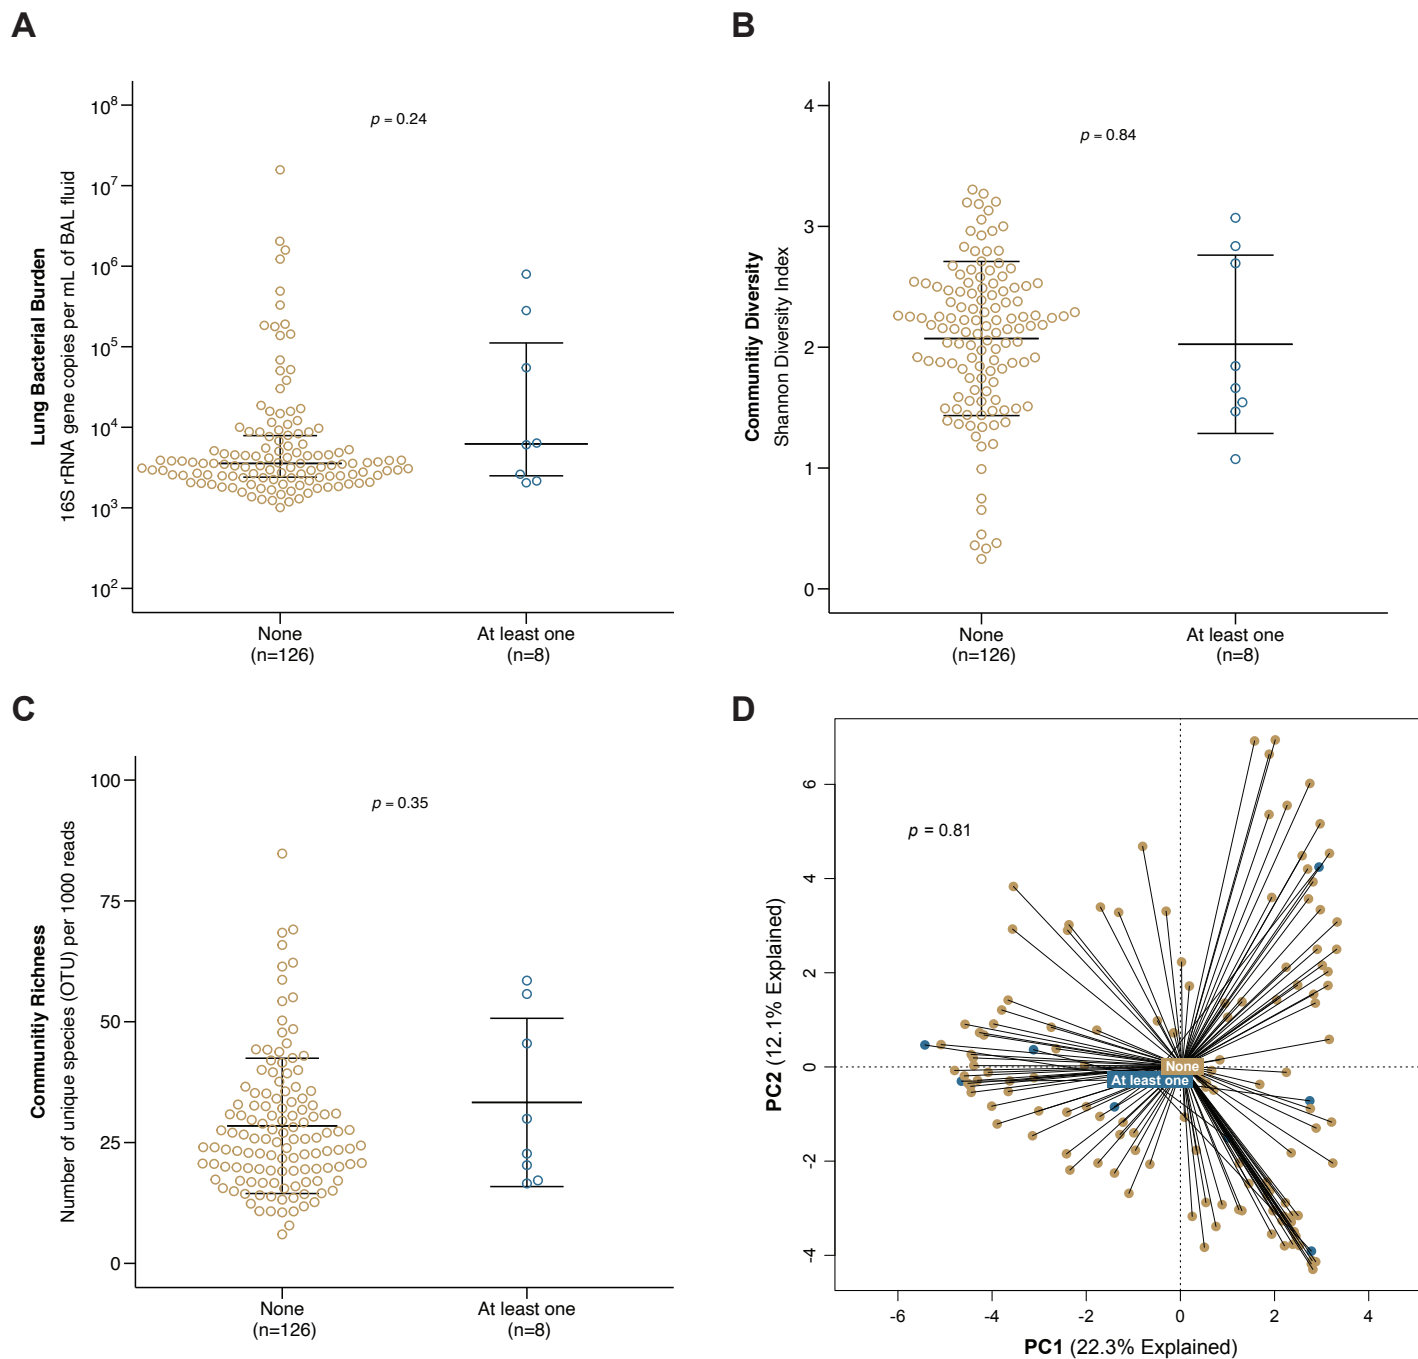

**Appendix Figure 21: Comparing respiratory microbiome characteristics on the basis of prior community-acquired respiratory viral infections.**

We compared the bacterial burden, community diversity, community richness, and overall community composition among BAL from one-year surveillance bronchoscopy among patients with (N=8) and without a history of having a community-acquired respiratory infection (CARV, N=128). CARV were defined as positive respiratory viral PCR and/or viral culture results in conjunction with respiratory symptoms, pulmonary function decline, or radiographic infiltrate. There was no difference in bacterial burden (A), community diversity (B), community richness (C), or overall community composition (D) between patients who did and did not have any prior CARV. Hypothesis testing performed using Wilcoxon rank-sum test (A), two-sample t test (B-C), and *adonis* (D). Lines indicate median and interquartile range (A) and mean +/- standard deviations (B-C).

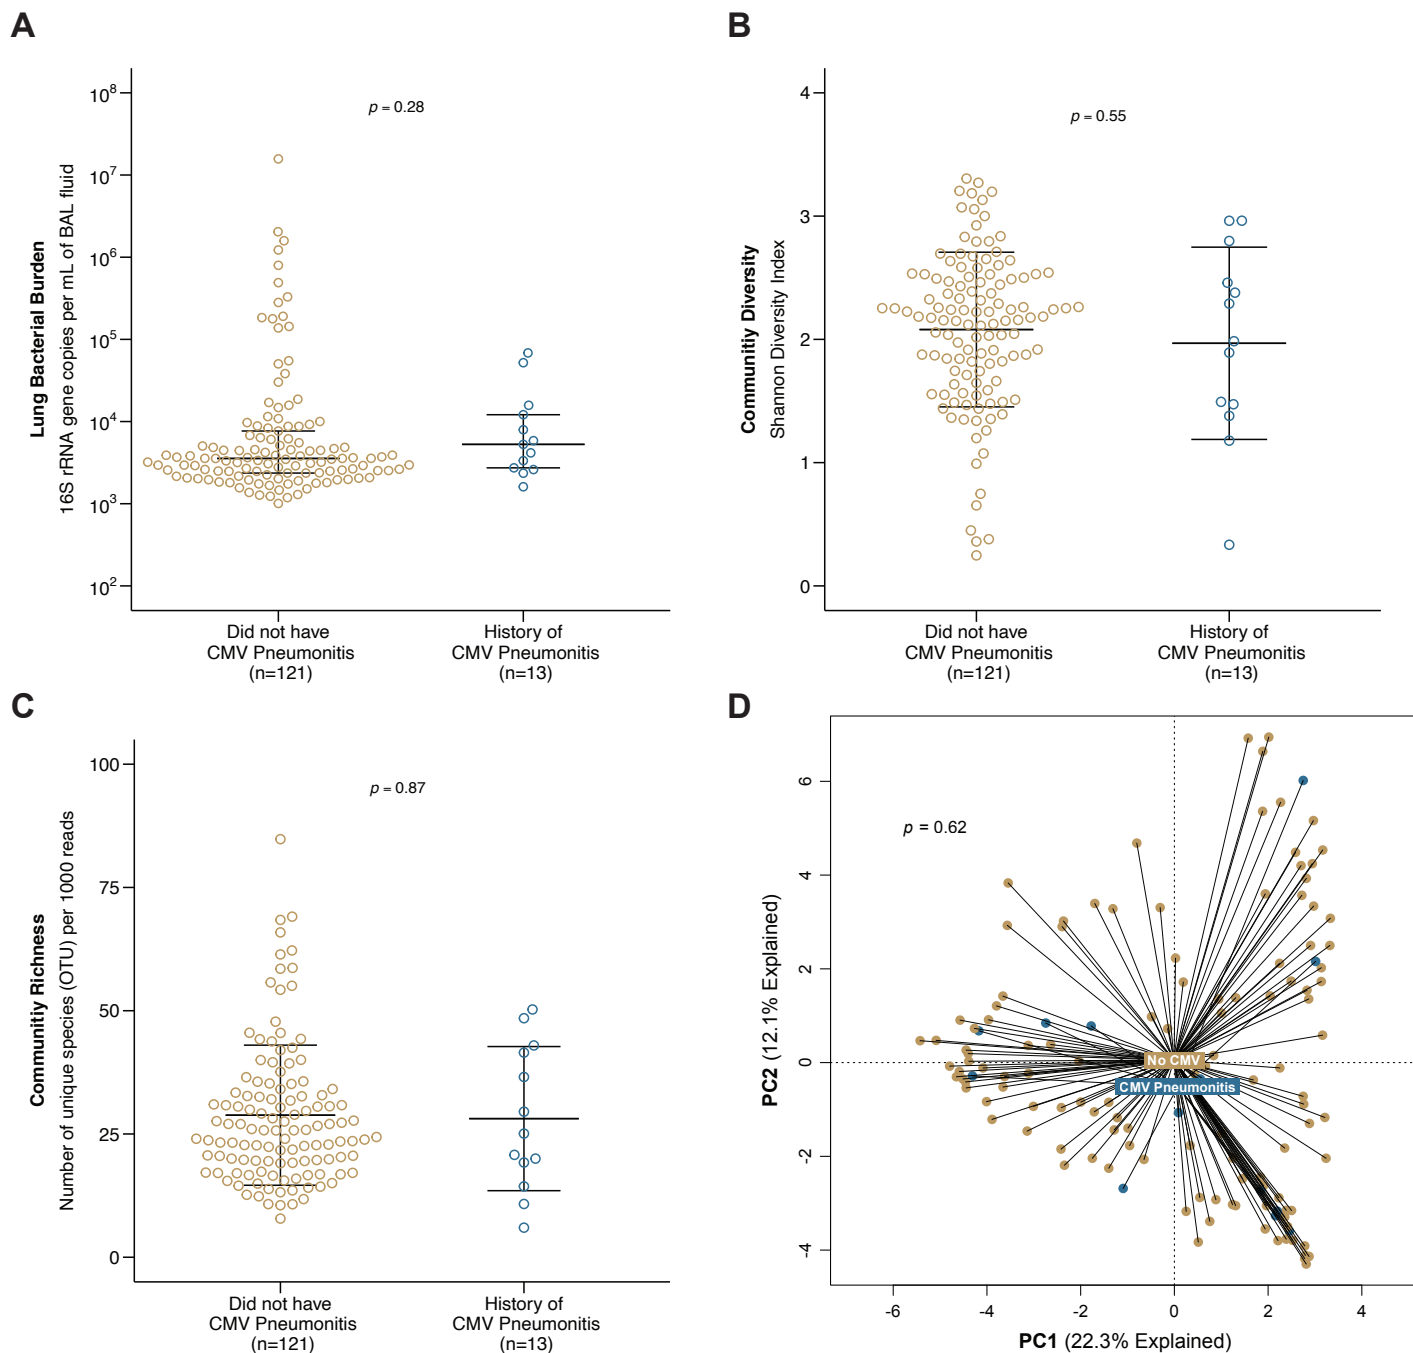

**Appendix Figure 22: Comparing respiratory microbiome characteristics on the basis of prior CMV pneumonitis.**

We compared the bacterial burden, community diversity, community richness, and overall community composition among BAL from one-year surveillance bronchoscopy among patients with (N=13) and without a history of CMV pneumonitis (N=121). CMV pneumonitis was defined by CMV inclusions seen on histopathology from transbronchial biopsy or a positive CMV culture from BAL in the presence of lower respiratory tract symptoms. There was no difference in bacterial burden (A), community diversity (B), community richness (C), or overall community composition (D) between patients who did and did not have a history of CMV pneumonitis. Hypothesis testing performed using Wilcoxon rank-sum test (A), two-sample t test (B-C), and *adonis* (D). Lines indicate median and interquartile range (A) and mean  $\pm$  standard deviations (B-C).

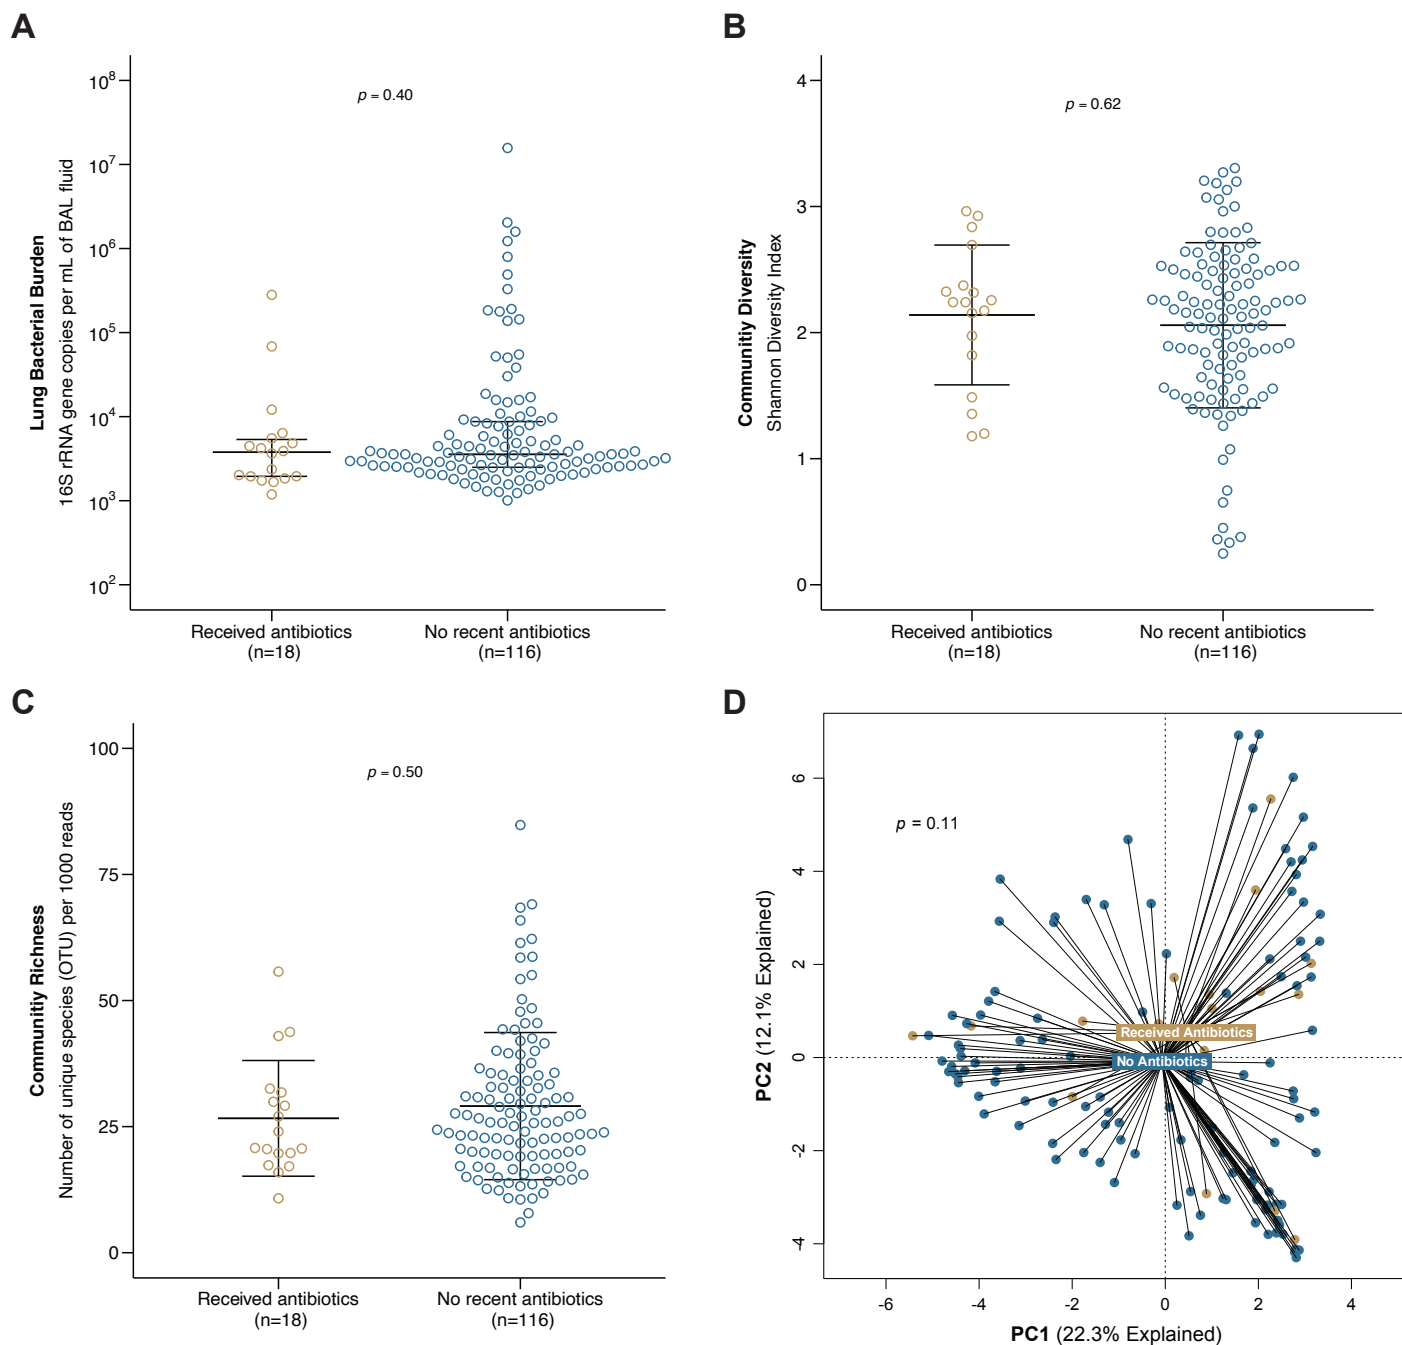

**Appendix Figure 23: Comparing respiratory microbiome characteristics on the basis of recent antibiotic exposure.**

We compared the bacterial burden, community diversity, community richness, and overall community composition between patients who had received antibiotics within the 30 days prior to one-year surveillance bronchoscopy (N=18) and patients who had not received any antibiotics, other than routine *Pneumocystis jirovecii* prophylaxis (N=116). There was no difference in bacterial burden (A), community diversity (B), community richness (C), or community composition (D) on the basis of recent antibiotic exposure. Hypothesis testing performed using Wilcoxon rank-sum test (A), two-sample t test (B-C) and *adonis* (D). Lines indicate median and interquartile range (A) and mean +/- standard deviations (B-C).

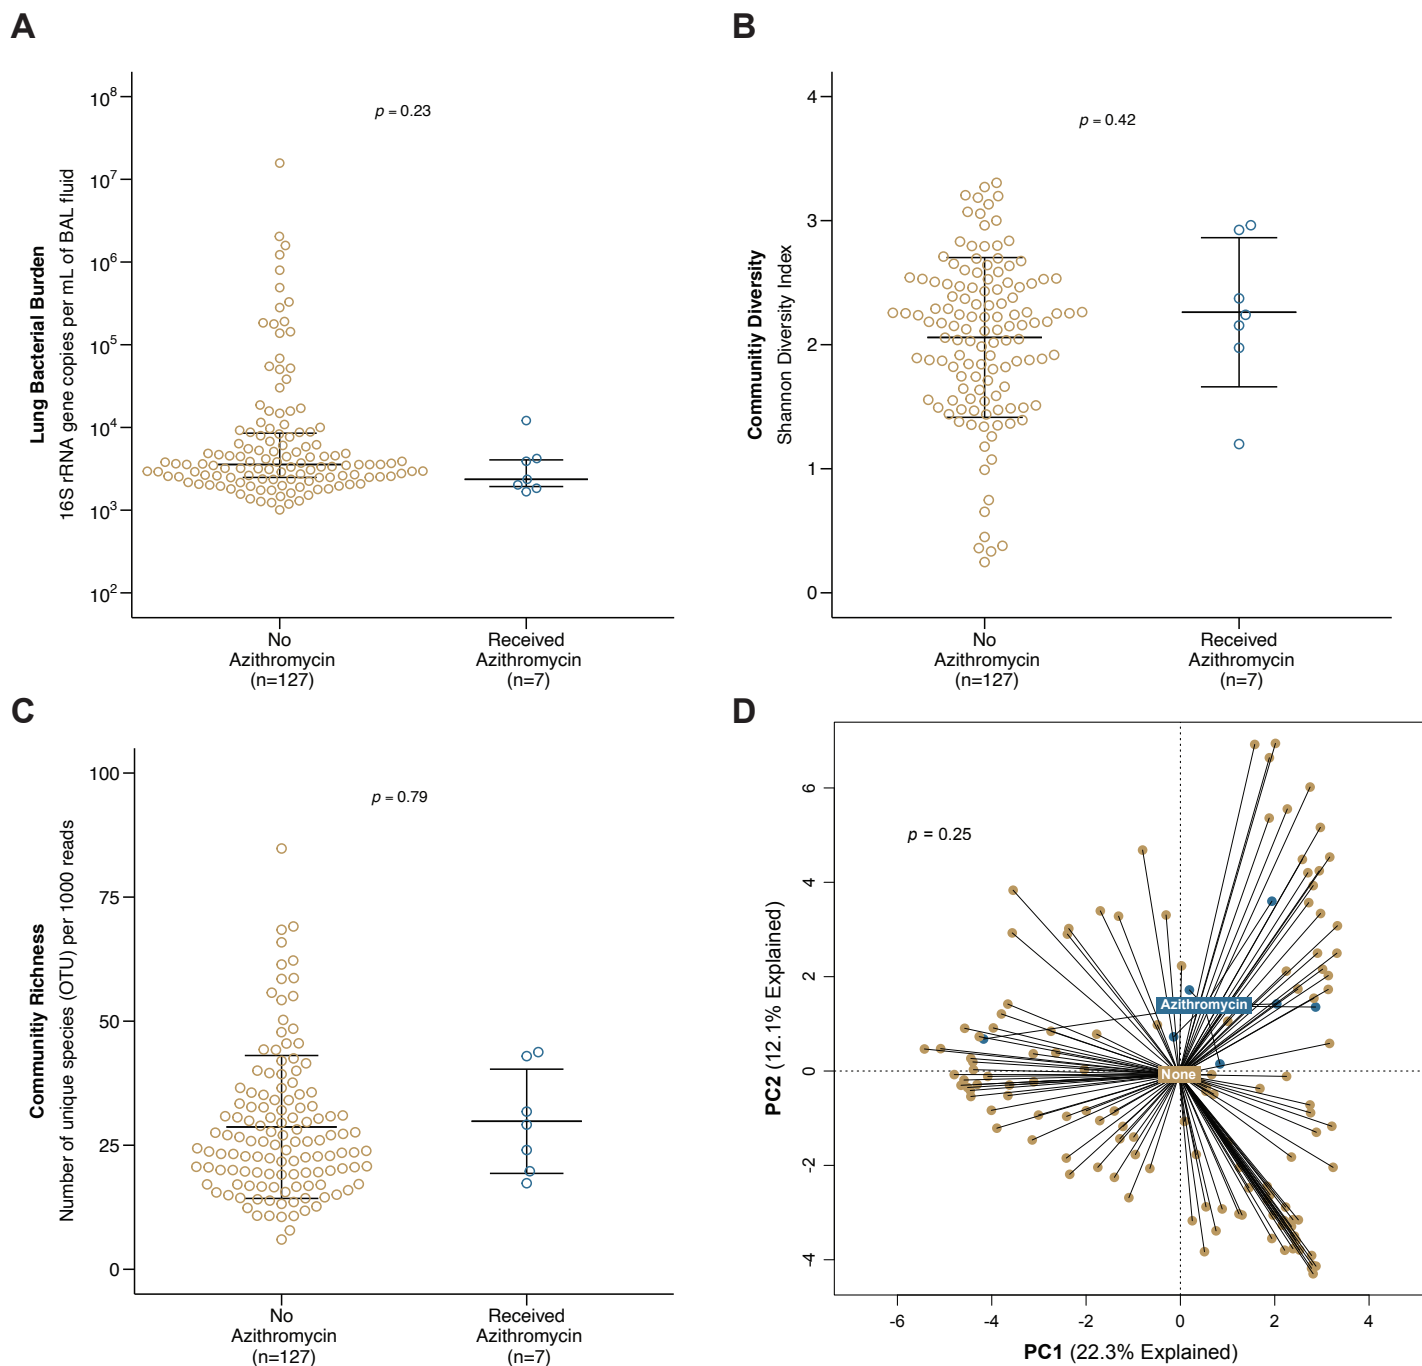

**Appendix Figure 24: Comparing respiratory microbiome characteristics on the basis of receipt of azithromycin for CLAD prevention.**

We compared the bacterial burden, community diversity, community richness, and overall community composition between patients who had received azithromycin for CLAD prevention at the time of one-year surveillance bronchoscopy (N=7) and patients who were not (N=127). There was no difference in bacterial burden (A), community diversity (B), community richness (C), or community composition (D) on the basis of recent antibiotic exposure. Hypothesis testing performed using Wilcoxon rank-sum test (A), two-sample t test (B-C) and *adonis* (D). Lines indicate median and interquartile range (A) and mean +/- standard deviations (B-C).



**Appendix Table 1:** Comparison of community composition by taxonomic level on between patients who develop CLAD or death within 500 days of one-year surveillance bronchoscopy vs. CLAD-free survivors

| Taxonomic Level | Analytic Method           |                                             |
|-----------------|---------------------------|---------------------------------------------|
|                 | <i>PERMANOVA p-value*</i> | <i>Multivariate GLM p-value<sup>†</sup></i> |
| Phylum          | 0.14                      | 0.057                                       |
| Class           | <b>0.036</b>              | <b>0.024</b>                                |
| Family          | <b>0.047</b>              | 0.091                                       |
| Genus           | <b>0.045</b>              | 0.11                                        |
| OTU             | 0.065                     | 0.086                                       |

*Definition of abbreviations:* PERMANOVA = permutational multivariate analysis of variance, GLM = generalized linear model, OTU = operational taxonomic unit.  
\*Computed using the *adonis* function in *vegan*,<sup>13</sup> requesting 10,000 permutations.  
<sup>†</sup>Computed using the *mvabund* package.<sup>14</sup>

**Appendix Table 2: Patients with evidence of *P. aeruginosa* on BAL culture or 16S rRNA gene sequencing**

| Patient ID | Age | Pre-Transplant Diagnosis | BAL Culture Result   | Relative abundance of <i>P. aeruginosa</i> (%) | Pre-Transplant Culture positive for <i>P. aeruginosa</i> <sup>a*</sup> | Colonized with <i>P. aeruginosa</i> post-lung transplant <sup>†</sup> |
|------------|-----|--------------------------|----------------------|------------------------------------------------|------------------------------------------------------------------------|-----------------------------------------------------------------------|
| 74         | 52  | COPD/Emphysema           | <i>P. aeruginosa</i> | 0.0%                                           | n/a                                                                    | Not colonized                                                         |
| 67         | 56  | IPF                      | Negative             | 1.4%                                           | n/a                                                                    | Not colonized                                                         |
| 23         | 29  | Cystic Fibrosis          | Negative             | 1.7%                                           | n/a                                                                    | Colonized                                                             |
| 85         | 39  | Cystic Fibrosis          | Oral Flora           | 2.0%                                           | Positive                                                               | Not colonized                                                         |
| 1          | 59  | IPF                      | Negative             | 3.0%                                           | Negative                                                               | Colonized                                                             |
| 130        | 56  | COPD/Emphysema           | Oral Flora           | 3.1%                                           | n/a                                                                    | Not colonized                                                         |
| 94         | 51  | COPD/Emphysema           | Oral Flora           | 3.3%                                           | n/a                                                                    | Not colonized                                                         |
| 77         | 28  | Cystic Fibrosis          | <i>P. aeruginosa</i> | 5.3%                                           | n/a                                                                    | Colonized                                                             |
| 51         | 47  | Cystic Fibrosis          | Oral Flora           | 8.4%                                           | n/a                                                                    | Colonized                                                             |
| 56         | 60  | COPD/Emphysema           | Oral Flora           | 11.4%                                          | n/a                                                                    | Not colonized                                                         |
| 32         | 32  | Cystic Fibrosis          | <i>P. aeruginosa</i> | 16.5%                                          | Positive                                                               | Colonized                                                             |
| 116        | 54  | COPD/Emphysema           | Oral Flora           | 26.7%                                          | n/a                                                                    | Not colonized                                                         |
| 14         | 27  | Cystic Fibrosis          | Negative             | 57.4%                                          | Positive                                                               | Colonized                                                             |
| 55         | 53  | RA-associatedILD         | <i>P. aeruginosa</i> | 64.4%                                          | n/a                                                                    | Colonized                                                             |
| 25         | 20  | Cystic Fibrosis          | <i>P. aeruginosa</i> | 94.3%                                          | n/a                                                                    | Colonized                                                             |
| 24         | 46  | Cystic Fibrosis          | <i>P. aeruginosa</i> | 97.4%                                          | Positive                                                               | Colonized                                                             |
| 57         | 19  | Cystic Fibrosis          | <i>P. aeruginosa</i> | 98.4%                                          | n/a                                                                    | Colonized                                                             |

*Definition of abbreviations:* BAL = bronchoalveolar lavage, COPD = Chronic obstructive lung disease, IPF = idiopathic pulmonary fibrosis, RA = rheumatoid arthritis, ILD = interstitial lung disease, n/a = not available.

<sup>a</sup>Based on BAL or sputum samples available prior to transplant. As the University of Michigan is a lung transplant referral center, some patients with CF did not receive their pre-transplant care at the University of Michigan and, thus, did not have pre-transplant culture data available.

<sup>†</sup>Patients with multiple BAL cultures positive of *P. aeruginosa*, regardless of symptoms, were considered to be colonized. 16S rRNA gene sequencing was not available at other time points and not considered for colonization.

| <b>Appendix Table 3: Predictors of developing CLAD in the 500 days after one-year post-transplant surveillance BAL</b>                                                                                                                                                                                                                                                                                                                                                                                                                                                                                                                                                                                                                                                                                                                                                                                                                                                                                                                                                                                                                                                                                                                                                                                                                                                                                                                                                                                                                                                                                                                                             |                     |                 |
|--------------------------------------------------------------------------------------------------------------------------------------------------------------------------------------------------------------------------------------------------------------------------------------------------------------------------------------------------------------------------------------------------------------------------------------------------------------------------------------------------------------------------------------------------------------------------------------------------------------------------------------------------------------------------------------------------------------------------------------------------------------------------------------------------------------------------------------------------------------------------------------------------------------------------------------------------------------------------------------------------------------------------------------------------------------------------------------------------------------------------------------------------------------------------------------------------------------------------------------------------------------------------------------------------------------------------------------------------------------------------------------------------------------------------------------------------------------------------------------------------------------------------------------------------------------------------------------------------------------------------------------------------------------------|---------------------|-----------------|
| <b>Variable</b>                                                                                                                                                                                                                                                                                                                                                                                                                                                                                                                                                                                                                                                                                                                                                                                                                                                                                                                                                                                                                                                                                                                                                                                                                                                                                                                                                                                                                                                                                                                                                                                                                                                    | <b>HR (95% CI)</b>  | <b>p-value*</b> |
| <b>Pre-Transplant Diagnosis</b>                                                                                                                                                                                                                                                                                                                                                                                                                                                                                                                                                                                                                                                                                                                                                                                                                                                                                                                                                                                                                                                                                                                                                                                                                                                                                                                                                                                                                                                                                                                                                                                                                                    |                     |                 |
| COPD                                                                                                                                                                                                                                                                                                                                                                                                                                                                                                                                                                                                                                                                                                                                                                                                                                                                                                                                                                                                                                                                                                                                                                                                                                                                                                                                                                                                                                                                                                                                                                                                                                                               | 1                   | Referent        |
| ILD                                                                                                                                                                                                                                                                                                                                                                                                                                                                                                                                                                                                                                                                                                                                                                                                                                                                                                                                                                                                                                                                                                                                                                                                                                                                                                                                                                                                                                                                                                                                                                                                                                                                | 1.50 (0.53 - 4.22)  | 0.45            |
| Cystic Fibrosis                                                                                                                                                                                                                                                                                                                                                                                                                                                                                                                                                                                                                                                                                                                                                                                                                                                                                                                                                                                                                                                                                                                                                                                                                                                                                                                                                                                                                                                                                                                                                                                                                                                    | 0.25 (0.05 - 1.31)  | 0.10            |
| Other                                                                                                                                                                                                                                                                                                                                                                                                                                                                                                                                                                                                                                                                                                                                                                                                                                                                                                                                                                                                                                                                                                                                                                                                                                                                                                                                                                                                                                                                                                                                                                                                                                                              | 0.93 (0.17 - 5.15)  | 0.93            |
| <b>Induction Immunosuppression</b>                                                                                                                                                                                                                                                                                                                                                                                                                                                                                                                                                                                                                                                                                                                                                                                                                                                                                                                                                                                                                                                                                                                                                                                                                                                                                                                                                                                                                                                                                                                                                                                                                                 |                     |                 |
| No Induction                                                                                                                                                                                                                                                                                                                                                                                                                                                                                                                                                                                                                                                                                                                                                                                                                                                                                                                                                                                                                                                                                                                                                                                                                                                                                                                                                                                                                                                                                                                                                                                                                                                       | 1                   | Referent        |
| Basiliximab                                                                                                                                                                                                                                                                                                                                                                                                                                                                                                                                                                                                                                                                                                                                                                                                                                                                                                                                                                                                                                                                                                                                                                                                                                                                                                                                                                                                                                                                                                                                                                                                                                                        | 0.27 (0.03 - 2.57)  | 0.25            |
| <b>Antiproliferative Immunosuppression†</b>                                                                                                                                                                                                                                                                                                                                                                                                                                                                                                                                                                                                                                                                                                                                                                                                                                                                                                                                                                                                                                                                                                                                                                                                                                                                                                                                                                                                                                                                                                                                                                                                                        |                     |                 |
| Azathioprine                                                                                                                                                                                                                                                                                                                                                                                                                                                                                                                                                                                                                                                                                                                                                                                                                                                                                                                                                                                                                                                                                                                                                                                                                                                                                                                                                                                                                                                                                                                                                                                                                                                       | 1                   | Referent        |
| Mycophenylate                                                                                                                                                                                                                                                                                                                                                                                                                                                                                                                                                                                                                                                                                                                                                                                                                                                                                                                                                                                                                                                                                                                                                                                                                                                                                                                                                                                                                                                                                                                                                                                                                                                      | 0.37 (0.12 - 1.11)  | 0.075           |
| None/Held                                                                                                                                                                                                                                                                                                                                                                                                                                                                                                                                                                                                                                                                                                                                                                                                                                                                                                                                                                                                                                                                                                                                                                                                                                                                                                                                                                                                                                                                                                                                                                                                                                                          | 1.99 (0.40 - 10.03) | 0.40            |
| <b>Primary Graft Dysfunction Immediately After Transplant</b>                                                                                                                                                                                                                                                                                                                                                                                                                                                                                                                                                                                                                                                                                                                                                                                                                                                                                                                                                                                                                                                                                                                                                                                                                                                                                                                                                                                                                                                                                                                                                                                                      |                     |                 |
| Grade 0                                                                                                                                                                                                                                                                                                                                                                                                                                                                                                                                                                                                                                                                                                                                                                                                                                                                                                                                                                                                                                                                                                                                                                                                                                                                                                                                                                                                                                                                                                                                                                                                                                                            | 1                   | Referent        |
| Grade 1                                                                                                                                                                                                                                                                                                                                                                                                                                                                                                                                                                                                                                                                                                                                                                                                                                                                                                                                                                                                                                                                                                                                                                                                                                                                                                                                                                                                                                                                                                                                                                                                                                                            | 0.80 (0.22 - 2.98)  | 0.74            |
| Grade 2                                                                                                                                                                                                                                                                                                                                                                                                                                                                                                                                                                                                                                                                                                                                                                                                                                                                                                                                                                                                                                                                                                                                                                                                                                                                                                                                                                                                                                                                                                                                                                                                                                                            | 0.35 (0.08 - 1.55)  | 0.17            |
| Grade 3                                                                                                                                                                                                                                                                                                                                                                                                                                                                                                                                                                                                                                                                                                                                                                                                                                                                                                                                                                                                                                                                                                                                                                                                                                                                                                                                                                                                                                                                                                                                                                                                                                                            | 1.39 (0.47 - 4.16)  | 0.55            |
| Average Cumulative A Rejection Score, per 1‡                                                                                                                                                                                                                                                                                                                                                                                                                                                                                                                                                                                                                                                                                                                                                                                                                                                                                                                                                                                                                                                                                                                                                                                                                                                                                                                                                                                                                                                                                                                                                                                                                       | 0.47 (0.12 - 1.83)  | 0.28            |
| Average Cumulative B Rejection score, per 1‡                                                                                                                                                                                                                                                                                                                                                                                                                                                                                                                                                                                                                                                                                                                                                                                                                                                                                                                                                                                                                                                                                                                                                                                                                                                                                                                                                                                                                                                                                                                                                                                                                       | 0.35 (0.03 - 4.18)  | 0.40            |
| DSA Present¶                                                                                                                                                                                                                                                                                                                                                                                                                                                                                                                                                                                                                                                                                                                                                                                                                                                                                                                                                                                                                                                                                                                                                                                                                                                                                                                                                                                                                                                                                                                                                                                                                                                       | 2.25 (0.66 - 7.68)  | 0.19            |
| <b>BAL Bacterial Culture Results§</b>                                                                                                                                                                                                                                                                                                                                                                                                                                                                                                                                                                                                                                                                                                                                                                                                                                                                                                                                                                                                                                                                                                                                                                                                                                                                                                                                                                                                                                                                                                                                                                                                                              |                     |                 |
| Negative                                                                                                                                                                                                                                                                                                                                                                                                                                                                                                                                                                                                                                                                                                                                                                                                                                                                                                                                                                                                                                                                                                                                                                                                                                                                                                                                                                                                                                                                                                                                                                                                                                                           | 1                   | Referent        |
| Oral Flora                                                                                                                                                                                                                                                                                                                                                                                                                                                                                                                                                                                                                                                                                                                                                                                                                                                                                                                                                                                                                                                                                                                                                                                                                                                                                                                                                                                                                                                                                                                                                                                                                                                         | 1.16 (0.40 - 3.40)  | 0.78            |
| Speciated Result                                                                                                                                                                                                                                                                                                                                                                                                                                                                                                                                                                                                                                                                                                                                                                                                                                                                                                                                                                                                                                                                                                                                                                                                                                                                                                                                                                                                                                                                                                                                                                                                                                                   | 0.62 (0.10 - 4.00)  | 0.62            |
| History of Community-Acquired Respiratory Viral Infection¶¶                                                                                                                                                                                                                                                                                                                                                                                                                                                                                                                                                                                                                                                                                                                                                                                                                                                                                                                                                                                                                                                                                                                                                                                                                                                                                                                                                                                                                                                                                                                                                                                                        | 0.58 (0.07 - 4.70)  | 0.61            |
| History of CMV Pneumonitis¶¶¶                                                                                                                                                                                                                                                                                                                                                                                                                                                                                                                                                                                                                                                                                                                                                                                                                                                                                                                                                                                                                                                                                                                                                                                                                                                                                                                                                                                                                                                                                                                                                                                                                                      | 1.75 (0.31 - 9.73)  | 0.52            |
| Lung Bacterial Burden, per log <sub>10</sub> increase§§                                                                                                                                                                                                                                                                                                                                                                                                                                                                                                                                                                                                                                                                                                                                                                                                                                                                                                                                                                                                                                                                                                                                                                                                                                                                                                                                                                                                                                                                                                                                                                                                            | 2.05 (1.07 - 3.94)  | <b>0.030</b>    |
| <b>Lung Bacterial Burden Tertiles§§</b>                                                                                                                                                                                                                                                                                                                                                                                                                                                                                                                                                                                                                                                                                                                                                                                                                                                                                                                                                                                                                                                                                                                                                                                                                                                                                                                                                                                                                                                                                                                                                                                                                            |                     |                 |
| Lowest Bacterial Burden Tertile                                                                                                                                                                                                                                                                                                                                                                                                                                                                                                                                                                                                                                                                                                                                                                                                                                                                                                                                                                                                                                                                                                                                                                                                                                                                                                                                                                                                                                                                                                                                                                                                                                    | 1                   | Referent        |
| Middle Bacterial Burden Tertile                                                                                                                                                                                                                                                                                                                                                                                                                                                                                                                                                                                                                                                                                                                                                                                                                                                                                                                                                                                                                                                                                                                                                                                                                                                                                                                                                                                                                                                                                                                                                                                                                                    | 4.71 (1.10 - 20.06) | <b>0.036</b>    |
| Highest Bacterial Burden Tertile                                                                                                                                                                                                                                                                                                                                                                                                                                                                                                                                                                                                                                                                                                                                                                                                                                                                                                                                                                                                                                                                                                                                                                                                                                                                                                                                                                                                                                                                                                                                                                                                                                   | 9.26 (2.04 - 42.07) | <b>0.0039</b>   |
| <p><i>Definition of abbreviations:</i> BAL = bronchoalveolar lavage, CLAD = chronic lung allograft dysfunction, COPD = Chronic obstructive lung disease, ILD = interstitial lung disease, DSA = donor specific antibodies.</p> <p>*Calculated using Cox proportional hazards regression models.</p> <p>†As determined at the time of one-year post-transplant surveillance bronchoscopy only. The immunosuppression regimen over the 500 days of follow up, including decisions to stop or start immunosuppression, transition within class, and add other agents was at the discretion of the transplant physician.</p> <p>‡Calculated by adding the ordinal values of each biopsy specimen's A or B score divided by the total number of biopsies performed in the first year post-transplant.</p> <p>¶Defined as a mean fluorescence intensity of ≥3000 via single antigen bead testing of the patient's serum prior to or at the time of 1-year post-transplant surveillance BAL. Sixty-four patients had no DSA information available and were analyzed as unique category (not reported).</p> <p>§Identified in the 1 year surveillance BAL.</p> <p>¶At any point from transplant to 1-year surveillance bronchoscopy.</p> <p>¶¶Defined as any positive RPAN in the presence of respiratory symptoms, transient decline in spirometry, or radiographic infiltrate.</p> <p>¶¶¶Defined as any CMV detected on transbronchial biopsy, CMV culture from BAL, or CMV shell antigen from BAL.</p> <p>‡‡Excluding routine pneumocystis carinii prophylaxis.</p> <p>§§Unique analyses were performed for Bacterial burden as a continuous variable and tertiles.</p> |                     |                 |

| <b>Appendix Table 4: Predictors of developing CLAD or death in the 2000 days after one-year post-transplant surveillance BAL</b>                                                                                                                                                                                                                                                                                                                                                                                                                                                                                                                                                                                                                                                                                                                                                                                                                                                                                                                                                                                                                                                                                                                                                                                                                                                                                                                                                                                                                                                                                                                                                                                                                                                                 |                    |                            |
|--------------------------------------------------------------------------------------------------------------------------------------------------------------------------------------------------------------------------------------------------------------------------------------------------------------------------------------------------------------------------------------------------------------------------------------------------------------------------------------------------------------------------------------------------------------------------------------------------------------------------------------------------------------------------------------------------------------------------------------------------------------------------------------------------------------------------------------------------------------------------------------------------------------------------------------------------------------------------------------------------------------------------------------------------------------------------------------------------------------------------------------------------------------------------------------------------------------------------------------------------------------------------------------------------------------------------------------------------------------------------------------------------------------------------------------------------------------------------------------------------------------------------------------------------------------------------------------------------------------------------------------------------------------------------------------------------------------------------------------------------------------------------------------------------|--------------------|----------------------------|
| <b>Variable</b>                                                                                                                                                                                                                                                                                                                                                                                                                                                                                                                                                                                                                                                                                                                                                                                                                                                                                                                                                                                                                                                                                                                                                                                                                                                                                                                                                                                                                                                                                                                                                                                                                                                                                                                                                                                  | <b>HR (95% CI)</b> | <b>p-value<sup>*</sup></b> |
| Pre-Transplant Diagnosis                                                                                                                                                                                                                                                                                                                                                                                                                                                                                                                                                                                                                                                                                                                                                                                                                                                                                                                                                                                                                                                                                                                                                                                                                                                                                                                                                                                                                                                                                                                                                                                                                                                                                                                                                                         |                    |                            |
| COPD                                                                                                                                                                                                                                                                                                                                                                                                                                                                                                                                                                                                                                                                                                                                                                                                                                                                                                                                                                                                                                                                                                                                                                                                                                                                                                                                                                                                                                                                                                                                                                                                                                                                                                                                                                                             | 1                  | Referent                   |
| ILD                                                                                                                                                                                                                                                                                                                                                                                                                                                                                                                                                                                                                                                                                                                                                                                                                                                                                                                                                                                                                                                                                                                                                                                                                                                                                                                                                                                                                                                                                                                                                                                                                                                                                                                                                                                              | 0.65 (0.34 - 1.25) | 0.19                       |
| Cystic Fibrosis                                                                                                                                                                                                                                                                                                                                                                                                                                                                                                                                                                                                                                                                                                                                                                                                                                                                                                                                                                                                                                                                                                                                                                                                                                                                                                                                                                                                                                                                                                                                                                                                                                                                                                                                                                                  | 0.42 (0.20 - 0.92) | <b>0.030</b>               |
| Other                                                                                                                                                                                                                                                                                                                                                                                                                                                                                                                                                                                                                                                                                                                                                                                                                                                                                                                                                                                                                                                                                                                                                                                                                                                                                                                                                                                                                                                                                                                                                                                                                                                                                                                                                                                            | 0.89 (0.34 - 2.31) | 0.81                       |
| Induction Immunosuppression                                                                                                                                                                                                                                                                                                                                                                                                                                                                                                                                                                                                                                                                                                                                                                                                                                                                                                                                                                                                                                                                                                                                                                                                                                                                                                                                                                                                                                                                                                                                                                                                                                                                                                                                                                      |                    |                            |
| No Induction                                                                                                                                                                                                                                                                                                                                                                                                                                                                                                                                                                                                                                                                                                                                                                                                                                                                                                                                                                                                                                                                                                                                                                                                                                                                                                                                                                                                                                                                                                                                                                                                                                                                                                                                                                                     | 1                  | Referent                   |
| Basiliximab                                                                                                                                                                                                                                                                                                                                                                                                                                                                                                                                                                                                                                                                                                                                                                                                                                                                                                                                                                                                                                                                                                                                                                                                                                                                                                                                                                                                                                                                                                                                                                                                                                                                                                                                                                                      | 0.52 (0.13 - 2.04) | 0.35                       |
| Antiproliferative Immunosuppression <sup>†</sup>                                                                                                                                                                                                                                                                                                                                                                                                                                                                                                                                                                                                                                                                                                                                                                                                                                                                                                                                                                                                                                                                                                                                                                                                                                                                                                                                                                                                                                                                                                                                                                                                                                                                                                                                                 |                    |                            |
| Azathioprine                                                                                                                                                                                                                                                                                                                                                                                                                                                                                                                                                                                                                                                                                                                                                                                                                                                                                                                                                                                                                                                                                                                                                                                                                                                                                                                                                                                                                                                                                                                                                                                                                                                                                                                                                                                     | 1                  | Referent                   |
| Mycophenylate                                                                                                                                                                                                                                                                                                                                                                                                                                                                                                                                                                                                                                                                                                                                                                                                                                                                                                                                                                                                                                                                                                                                                                                                                                                                                                                                                                                                                                                                                                                                                                                                                                                                                                                                                                                    | 1.02 (0.54 - 1.94) | 0.94                       |
| None/Held                                                                                                                                                                                                                                                                                                                                                                                                                                                                                                                                                                                                                                                                                                                                                                                                                                                                                                                                                                                                                                                                                                                                                                                                                                                                                                                                                                                                                                                                                                                                                                                                                                                                                                                                                                                        | 2.95 (1.21 - 7.19) | <b>0.018</b>               |
| Primary Graft Dysfunction Immediately After Transplant                                                                                                                                                                                                                                                                                                                                                                                                                                                                                                                                                                                                                                                                                                                                                                                                                                                                                                                                                                                                                                                                                                                                                                                                                                                                                                                                                                                                                                                                                                                                                                                                                                                                                                                                           |                    |                            |
| Grade 0                                                                                                                                                                                                                                                                                                                                                                                                                                                                                                                                                                                                                                                                                                                                                                                                                                                                                                                                                                                                                                                                                                                                                                                                                                                                                                                                                                                                                                                                                                                                                                                                                                                                                                                                                                                          | 1                  | Referent                   |
| Grade 1                                                                                                                                                                                                                                                                                                                                                                                                                                                                                                                                                                                                                                                                                                                                                                                                                                                                                                                                                                                                                                                                                                                                                                                                                                                                                                                                                                                                                                                                                                                                                                                                                                                                                                                                                                                          | 0.92 (0.42 - 2.02) | 0.84                       |
| Grade 2                                                                                                                                                                                                                                                                                                                                                                                                                                                                                                                                                                                                                                                                                                                                                                                                                                                                                                                                                                                                                                                                                                                                                                                                                                                                                                                                                                                                                                                                                                                                                                                                                                                                                                                                                                                          | 0.63 (0.29 - 1.35) | 0.24                       |
| Grade 3                                                                                                                                                                                                                                                                                                                                                                                                                                                                                                                                                                                                                                                                                                                                                                                                                                                                                                                                                                                                                                                                                                                                                                                                                                                                                                                                                                                                                                                                                                                                                                                                                                                                                                                                                                                          | 0.93 (0.47 - 1.85) | 0.84                       |
| Average Cumulative A Rejection Score, per 1 <sup>‡</sup>                                                                                                                                                                                                                                                                                                                                                                                                                                                                                                                                                                                                                                                                                                                                                                                                                                                                                                                                                                                                                                                                                                                                                                                                                                                                                                                                                                                                                                                                                                                                                                                                                                                                                                                                         | 1.11 (0.57 - 2.17) | 0.75                       |
| Average Cumulative B Rejection score, per 1 <sup>‡</sup>                                                                                                                                                                                                                                                                                                                                                                                                                                                                                                                                                                                                                                                                                                                                                                                                                                                                                                                                                                                                                                                                                                                                                                                                                                                                                                                                                                                                                                                                                                                                                                                                                                                                                                                                         | 0.53 (0.11 - 2.64) | 0.44                       |
| DSA Present <sup>†</sup>                                                                                                                                                                                                                                                                                                                                                                                                                                                                                                                                                                                                                                                                                                                                                                                                                                                                                                                                                                                                                                                                                                                                                                                                                                                                                                                                                                                                                                                                                                                                                                                                                                                                                                                                                                         | 1.25 (0.53 - 2.95) | 0.61                       |
| BAL Bacterial Culture Results <sup>§</sup>                                                                                                                                                                                                                                                                                                                                                                                                                                                                                                                                                                                                                                                                                                                                                                                                                                                                                                                                                                                                                                                                                                                                                                                                                                                                                                                                                                                                                                                                                                                                                                                                                                                                                                                                                       |                    |                            |
| Negative                                                                                                                                                                                                                                                                                                                                                                                                                                                                                                                                                                                                                                                                                                                                                                                                                                                                                                                                                                                                                                                                                                                                                                                                                                                                                                                                                                                                                                                                                                                                                                                                                                                                                                                                                                                         | 1                  | Referent                   |
| Oral Flora                                                                                                                                                                                                                                                                                                                                                                                                                                                                                                                                                                                                                                                                                                                                                                                                                                                                                                                                                                                                                                                                                                                                                                                                                                                                                                                                                                                                                                                                                                                                                                                                                                                                                                                                                                                       | 0.90 (0.50 - 1.63) | 0.73                       |
| Speciated Result                                                                                                                                                                                                                                                                                                                                                                                                                                                                                                                                                                                                                                                                                                                                                                                                                                                                                                                                                                                                                                                                                                                                                                                                                                                                                                                                                                                                                                                                                                                                                                                                                                                                                                                                                                                 | 0.77 (0.31 - 1.94) | 0.58                       |
| History of Community-Acquired Respiratory Viral Infection <sup>†,¶¶</sup>                                                                                                                                                                                                                                                                                                                                                                                                                                                                                                                                                                                                                                                                                                                                                                                                                                                                                                                                                                                                                                                                                                                                                                                                                                                                                                                                                                                                                                                                                                                                                                                                                                                                                                                        | 0.77 (0.22 - 2.62) | 0.67                       |
| History of CMV Pneumonitis <sup>†,¶¶</sup>                                                                                                                                                                                                                                                                                                                                                                                                                                                                                                                                                                                                                                                                                                                                                                                                                                                                                                                                                                                                                                                                                                                                                                                                                                                                                                                                                                                                                                                                                                                                                                                                                                                                                                                                                       | 1.80 (0.77 - 4.18) | 0.17                       |
| Lung Bacterial Burden, per log <sub>10</sub> increase <sup>§§</sup>                                                                                                                                                                                                                                                                                                                                                                                                                                                                                                                                                                                                                                                                                                                                                                                                                                                                                                                                                                                                                                                                                                                                                                                                                                                                                                                                                                                                                                                                                                                                                                                                                                                                                                                              | 1.55 (1.04 - 2.30) | <b>0.030</b>               |
| Lung Bacterial Burden Tertiles <sup>§§</sup>                                                                                                                                                                                                                                                                                                                                                                                                                                                                                                                                                                                                                                                                                                                                                                                                                                                                                                                                                                                                                                                                                                                                                                                                                                                                                                                                                                                                                                                                                                                                                                                                                                                                                                                                                     |                    |                            |
| Lowest Bacterial Burden Tertile                                                                                                                                                                                                                                                                                                                                                                                                                                                                                                                                                                                                                                                                                                                                                                                                                                                                                                                                                                                                                                                                                                                                                                                                                                                                                                                                                                                                                                                                                                                                                                                                                                                                                                                                                                  | 1                  | Referent                   |
| Middle Bacterial Burden Tertile                                                                                                                                                                                                                                                                                                                                                                                                                                                                                                                                                                                                                                                                                                                                                                                                                                                                                                                                                                                                                                                                                                                                                                                                                                                                                                                                                                                                                                                                                                                                                                                                                                                                                                                                                                  | 1.52 (0.79 - 2.93) | 0.21                       |
| Highest Bacterial Burden Tertile                                                                                                                                                                                                                                                                                                                                                                                                                                                                                                                                                                                                                                                                                                                                                                                                                                                                                                                                                                                                                                                                                                                                                                                                                                                                                                                                                                                                                                                                                                                                                                                                                                                                                                                                                                 | 1.86 (0.90 - 3.85) | 0.093                      |
| <p><i>Definition of abbreviations:</i> BAL = bronchoalveolar lavage, CLAD = chronic lung allograft dysfunction, COPD = Chronic obstructive lung disease, ILD = interstitial lung disease, DSA = donor specific antibodies.</p> <p><sup>*</sup>Calculated using Cox proportional hazards regression models.</p> <p><sup>†</sup>As determined at the time of one-year post-transplant surveillance bronchoscopy only. The immunosuppression regimen over the 500 days of follow up, including decisions to stop or start immunosuppression, transition within class, and add other agents was at the discretion of the transplant physician.</p> <p><sup>‡</sup>Calculated by adding the ordinal values of each biopsy specimen's A or B score divided by the total number of biopsies performed in the first year post-transplant.</p> <p><sup>§</sup>Defined as a mean fluorescence intensity of <math>\geq 3000</math> via single antigen bead testing of the patient's serum prior to or at the time of 1-year post-transplant surveillance BAL. Sixty-four patients had no DSA information available and were analyzed as unique category (not reported).</p> <p><sup>§</sup>Identified in the 1 year surveillance BAL.</p> <p><sup>¶</sup>At any point from transplant to 1-year surveillance bronchoscopy.</p> <p><sup>¶¶</sup>Defined as any positive RPAN in the presence of respiratory symptoms, transient decline in spirometry, or radiographic infiltrate.</p> <p><sup>¶¶</sup>Defined as any CMV detected on transbronchial biopsy, CMV culture from BAL, or CMV shell antigen from BAL.</p> <p><sup>§§</sup>Excluding routine pneumocystis carinii prophylaxis.</p> <p><sup>§§</sup>Unique analyses were performed for Bacterial burden as a continuous variable and tertiles.</p> |                    |                            |

**Appendix Table 5:** Detailed clinical information for patients who were not receiving an antiproliferative immunosuppression medication at the time of one-year post-transplant surveillance bronchoscopy.

| ID  | Sex    | Age | Pre-Transplant Diagnosis | Duration Immunosuppression Held at BAL | Previous Antiproliferative Immunosuppressive Medication | Total 16S copies/mL | Shannon Diversity Index | Number of unique OTU per 1000 reads | Clinical Vignette                                                                                                                                                                                                                                                                                                                                                                                                                                                                                         |
|-----|--------|-----|--------------------------|----------------------------------------|---------------------------------------------------------|---------------------|-------------------------|-------------------------------------|-----------------------------------------------------------------------------------------------------------------------------------------------------------------------------------------------------------------------------------------------------------------------------------------------------------------------------------------------------------------------------------------------------------------------------------------------------------------------------------------------------------|
| 20  | Female | 60  | COPD/<br>Emphysema       | 1 day                                  | MMF                                                     | 3641                | 2.32                    | 20.5                                | Seen at a local hospital for malaise and poor oral intake and was empirically treated with antibiotics. She was subsequently transferred to the University of Michigan where she was found to be at her baseline, with the working diagnosis for her initial presentation attributed to dehydration. The surveillance bronchoscopy was done as an inpatient for convenience's sake; immediately thereafter the patient was promptly discharged with no antibiotics and her immunosuppression was resumed. |
| 98  | Male   | 58  | ILD                      | 3 weeks                                | Azathioprine                                            | 1186                | 2.17                    | 19.7                                | Admitted for cellulitis three weeks prior bronchoscopy, completed a two-week course of antibiotics. Immunosuppression was not restarted upon completion of antibiotics due to mild elevation in liver function tests; shortly after the bronchoscopy these had resolved, and immunosuppression was resumed.                                                                                                                                                                                               |
| 18  | Female | 48  | COPD/<br>Emphysema       | 1 month                                | Azathioprine                                            | 4551                | 1.71                    | 22.7                                | CMV viremia diagnosed one month prior to surveillance BAL, initiated on valganciclovir. Shortly after starting treatment, she returned to her baseline. Remained on antiviral treatment at the time of her surveillance bronchoscopy.                                                                                                                                                                                                                                                                     |
| 34  | Female | 55  | Other                    | 1 month                                | Azathioprine                                            | 3067                | 1.92                    | 15.6                                | WBC was $<2.5$ , per protocol immunosuppression had been reduced and then stopped.                                                                                                                                                                                                                                                                                                                                                                                                                        |
| 122 | Female | 53  | ILD                      | 2 months                               | MMF                                                     | 2951                | 1.36                    | 16.8                                | CMV pneumonia two months prior, was treated with valganciclovir for three weeks with improvement in CT imaging. WBC had decreased to $<2.5$ while on antiviral treatment and immunosuppression remained on hold at time of surveillance bronchoscopy pending improvement in leukopenia.                                                                                                                                                                                                                   |
| 76  | Female | 20  | Cystic Fibrosis          | 3 months                               | MMF                                                     | 15708014            | 0.38                    | 10.7                                | Patient diagnosed with CMV colitis/viremia and was started on valganciclovir and immunosuppression was held. GI symptoms had resolved shortly after treatment; no respiratory issues at diagnosis or time of bronchoscopy.                                                                                                                                                                                                                                                                                |
| 51  | Female | 42  | Cystic Fibrosis          | 3 months                               | MMF                                                     | 1518                | 2.04                    | 35.7                                | Patient had persistent low-grade CMV viremia requiring treatment with valganciclovir and CMV immunoglobulin, her immunosuppression was held per protocol while on these treatments.                                                                                                                                                                                                                                                                                                                       |
| 59  | Female | 62  | ILD                      | 3 months                               | MMF                                                     | 54850               | 1.84                    | 45.5                                | WBC was $<2.5$ , per protocol immunosuppression had been reduced and then stopped.                                                                                                                                                                                                                                                                                                                                                                                                                        |
| 134 | Male   | 64  | ILD                      | 3 months                               | MMF                                                     | 1007                | 2.15                    | 27.7                                | CMV pneumonia three months prior, was treated with valganciclovir and immunosuppression was held. Symptomatically improved in the interim and was back to baseline lung function. Immunosuppression remained on hold while awaiting results of surveillance bronchoscopy.                                                                                                                                                                                                                                 |
| 110 | Male   | 59  | COPD/<br>Emphysema       | 4 months                               | MMF                                                     | 1372                | 1.56                    | 21.8                                | CMV viremia four months prior, started on valganciclovir and immunosuppression was held. Viremia persistent at time of bronchoscopy but patient was at baseline respiratory status.                                                                                                                                                                                                                                                                                                                       |

|     |      |    |                    |          |      |        |      |      |                                                                                                                                                                                                                                             |
|-----|------|----|--------------------|----------|------|--------|------|------|---------------------------------------------------------------------------------------------------------------------------------------------------------------------------------------------------------------------------------------------|
| 106 | Male | 47 | ILD                | 5 months | MMF  | 4536   | 2.29 | 24.0 | CMV viremia diagnosed five months prior, started on valganciclovir and immunosuppression was held. Viremia had resolved as of bronchoscopy, immunosuppression remained on hold pending results of bronchoscopy.                             |
| 47  | Male | 57 | ILD                | 5 months | None | 68416  | 1.18 | 20.8 | Patient was found to have a <i>Mycobacterium chelonae</i> infection of his pleural space after his transplant. To manage this infection his immunosuppression was held, and he was on treatment with long-term antibiotics.                 |
| 88  | Male | 67 | COPD/<br>Emphysema | 5 months | MMF  | 796254 | 3.07 | 58.5 | Previously had CMV viremia which had resolved after treatment of valganciclovir; immunosuppression was not resumed due to persistent WBC <2.5. Otherwise asymptomatic with stable/improving lung function.                                  |
| 78  | Male | 27 | Cystic<br>Fibrosis | 6 months | MMF  | 5520   | 1.49 | 15.9 | CMV viremia diagnosed six months prior to surveillance bronchoscopy, started on valganciclovir and immunosuppression was held. Viremia had resolved as of bronchoscopy, with plan to resume immunosuppression pending bronchoscopy results. |
| 67  | Male | 32 | Cystic<br>Fibrosis | 9 months | MMF  | 1899   | 2.18 | 22.8 | Patient had PTLD shortly after transplant for which immunosuppression had been held. One month prior to surveillance BAL, PET scan showed complete resolution of PTLD.                                                                      |

*Definition of abbreviations:* BAL = bronchoalveolar lavage, COPD = Chronic obstructive lung disease, CMV = cytomegalovirus, CT = computed tomography, ID = sample identifier, ILD = interstitial lung disease, MMF = mycophenolate mofetil, OTU = operational taxonomic unit, PET = positron emission tomography, PTLD = post-transplant lymphoproliferative disorder, WBC = white blood cell count.

**Appendix Table 6:** Detailed clinical information for patients who received antibiotics within 30 days of one-year post-transplant surveillance bronchoscopy.

| ID  | Sex    | Age | Pre-Transplant Diagnosis | Days prior to BAL that antibiotics were discontinued | Antibiotics Received             | Total 16S copies/mL | Shannon Diversity Index | Number of unique OTU per 1000 reads | BAL Culture Results | Clinical Vignette                                                                                                                                                                                                                                                                                                                                                                                                                                   |
|-----|--------|-----|--------------------------|------------------------------------------------------|----------------------------------|---------------------|-------------------------|-------------------------------------|---------------------|-----------------------------------------------------------------------------------------------------------------------------------------------------------------------------------------------------------------------------------------------------------------------------------------------------------------------------------------------------------------------------------------------------------------------------------------------------|
| 81  | Male   | 26  | ILD                      | 0                                                    | Azithromycin                     | 2020                | 2.15                    | 24                                  | Oral flora          | Was taking azithromycin three times weekly for CLAD prevention at time of bronchoscopy.                                                                                                                                                                                                                                                                                                                                                             |
| 37  | Male   | 26  | Cystic Fibrosis          | 0                                                    | Azithromycin                     | 6369                | 2.69                    | 29.9                                | Oral flora          | Prior bronchoscopy with <i>Mycobacterium chelonae abscesses</i> , for which the patients was started on chronic suppressive antibiotics. Most recent CT scan had shown no signs of active infection and BAL AFB culture was negative.                                                                                                                                                                                                               |
| 133 | Male   | 27  | Cystic Fibrosis          | 0                                                    | Inhaled Colistin                 | 1737                | 1.82                    | 17.1                                | Oral flora          | The patient had multiple BAL cultures were positive for <i>P. aeruginosa</i> after transplant, prompting initiation of inhaled antibiotics every other month for suppressive therapy (currently using at time of bronchoscopy). Since starting this regimen eight months prior to surveillance bronchoscopy, subsequent BAL cultures had not shown persistent <i>P. aeruginosa</i> and the patient was asymptomatic from a respiratory perspective. |
| 68  | Male   | 54  | ILD                      | 0                                                    | Azithromycin, Inhaled Tobramycin | 4208                | 2.24                    | 29.1                                | Negative            | Prior BAL results showed persistent positive cultures for <i>P. aeruginosa</i> , prompting initiation of inhaled antibiotics for suppression. The patient was not symptomatic for multiple visits prior to surveillance bronchoscopy. In addition to the inhaled antibiotics, he was taking azithromycin three times weekly for CLAD prevention.                                                                                                    |
| 15  | Male   | 55  | ILD                      | 0                                                    | Azithromycin                     | 3898                | 2.92                    | 43.8                                | Oral flora          | Was taking azithromycin three times weekly for CLAD prevention at time of bronchoscopy.                                                                                                                                                                                                                                                                                                                                                             |
| 47  | Male   | 57  | ILD                      | 0                                                    | Moxifloxacin, Azithromycin       | 68416               | 1.18                    | 20.8                                | Oral flora          | Patient was found to have a <i>Mycobacterium chelonae</i> infection of his pleural space after transplant and was treated with long-term antibiotics. At the time of surveillance bronchoscopy, he had no acute issues and the antibiotics were discontinued after negative BAL cultures.                                                                                                                                                           |
| 65  | Male   | 62  | ILD                      | 0                                                    | Azithromycin                     | 1839                | 1.2                     | 17.3                                | Oral flora          | Was taking azithromycin three times weekly for CLAD prevention at time of bronchoscopy.                                                                                                                                                                                                                                                                                                                                                             |
| 31  | Male   | 63  | ILD                      | 0                                                    | Azithromycin                     | 12111               | 2.96                    | 43                                  | Oral flora          | Was taking azithromycin three times weekly for CLAD prevention at time of bronchoscopy.                                                                                                                                                                                                                                                                                                                                                             |
| 107 | Female | 65  | COPD/ Emphysema          | 0                                                    | Amoxicillin                      | 2358                | 1.97                    | 19.8                                | Oral flora          | Had upper respiratory infection symptoms and was empirically treated with amoxicillin 10 days prior to bronchoscopy without improvement. At the time of bronchoscopy, the patient denied cough or shortness of breath; her PFT values were at her baseline and chest imaging was clear.                                                                                                                                                             |
| 103 | Female | 66  | COPD/ Emphysema          | 0                                                    | Azithromycin                     | 1670                | 2.37                    | 31.8                                | Negative            | Was taking azithromycin three times weekly for CLAD prevention at time of bronchoscopy.                                                                                                                                                                                                                                                                                                                                                             |
| 109 | Male   | 47  | ILD                      | 1                                                    | Azithromycin                     | 28163               | 2.84                    | 55.7                                | Oral flora          | Developed upper respiratory infection symptoms the week prior to surveillance bronchoscopy and was given an empiric course of antibiotics.                                                                                                                                                                                                                                                                                                          |

|    |        |    |                    |    |                                              |      |      |      |                      |                                                                                                                                                                                                                                                                                                                                                                                                                                                                                                           |
|----|--------|----|--------------------|----|----------------------------------------------|------|------|------|----------------------|-----------------------------------------------------------------------------------------------------------------------------------------------------------------------------------------------------------------------------------------------------------------------------------------------------------------------------------------------------------------------------------------------------------------------------------------------------------------------------------------------------------|
| 20 | Female | 60 | COPD/<br>Emphysema | 1  | Vancomycin;<br>Ceftriaxone;<br>Levofloxacin  | 3641 | 2.32 | 20.5 | Oral flora           | Seen at a local hospital for malaise and poor oral intake and was empirically treated with antibiotics. She was subsequently transferred to the University of Michigan where she was found to be at her baseline, with the working diagnosis for her initial presentation attributed to dehydration. The surveillance bronchoscopy was done as an inpatient for convenience's sake; immediately thereafter the patient was promptly discharged with no antibiotics and her immunosuppression was resumed. |
| 98 | Male   | 58 | ILD                | 6  | Piperacillin-<br>Tazobactam                  | 1186 | 2.17 | 19.7 | Negative             | Admitted for cellulitis three weeks prior bronchoscopy, was empirically treated for a two-week course. Patient reported no respiratory symptoms during or after treatment.                                                                                                                                                                                                                                                                                                                                |
| 78 | Male   | 27 | Cystic<br>Fibrosis | 17 | Ciprofloxacin                                | 5520 | 1.49 | 15.9 | <i>P. aeruginosa</i> | Five weeks prior to surveillance bronchoscopy he underwent sinus surgery for persistent sinusitis, he was treated with two weeks of ciprofloxacin for prophylaxis post-operatively.                                                                                                                                                                                                                                                                                                                       |
| 82 | Male   | 55 | COPD/<br>Emphysema | 18 | Levofloxacin                                 | 1954 | 1.35 | 10.8 | <i>E. coli</i>       | Received a 10-day course of antibiotics for upper respiratory infection symptoms; symptomatically improved by end of course.                                                                                                                                                                                                                                                                                                                                                                              |
| 85 | Male   | 64 | ILD                | 20 | Levofloxacin                                 | 1947 | 2.32 | 32.5 | Oral flora           | Diagnosed with <i>H. influenzae</i> pneumonia one month prior, completed two-week course of antibiotics; was back to his baseline after treatment.                                                                                                                                                                                                                                                                                                                                                        |
| 32 | Male   | 51 | COPD/<br>Emphysema | 27 | Levofloxacin;<br>Amoxicillin-<br>Clavulanate | 4467 | 2.26 | 27   | Oral flora           | Had a productive cough and CT scan with consolidation 5 weeks prior to bronchoscopy, completed empiric two-week course of antibiotics. At clinic visit one week prior to surveillance bronchoscopy the patient's cough had improved and the CT scan showed resolution of the infiltrate.                                                                                                                                                                                                                  |
| 80 | Male   | 26 | Cystic<br>Fibrosis | 29 | Doxycycline                                  | 4842 | 2.24 | 20.7 | Oral flora           | Had a sinus infection six weeks prior to bronchoscopy, for which he was empirically treated with a two-week course of antibiotics.                                                                                                                                                                                                                                                                                                                                                                        |

*Definition of abbreviations:* AFB = acid fast bacteria, BAL = bronchoalveolar lavage, CLAD = chronic lung allograft dysfunction, COPD = Chronic obstructive lung disease, CT = computed tomography, ID = sample identifier, ILD = interstitial lung disease, OTU = operational taxonomic unit, PFT = pulmonary function testing.



**Appendix Table 7:** Evaluating the independent effects and interaction of immunosuppression regimen at the time of surveillance bronchoscopy and bacterial burden on developing CLAD or death in the 500 days after one-year post-transplant surveillance BAL

| <i>Model 1: Bacterial Burden as continuous variable*</i>                                                     |                      |              |
|--------------------------------------------------------------------------------------------------------------|----------------------|--------------|
| Variable                                                                                                     | HR (95% CI)          | p-value      |
| Antiproliferative Immunosuppression <sup>†</sup>                                                             |                      |              |
| Azathioprine                                                                                                 | 1                    | Referent     |
| Mycophenylate                                                                                                | 0.13 (0.00 - 6.88)   | 0.32         |
| None/Held                                                                                                    | 1.16 (0.03 - 42.05)  | 0.94         |
| Lung Bacterial Burden, per log <sub>10</sub> increase <sup>§§</sup>                                          | 1.64 (0.89 - 3.02)   | 0.11         |
| Interaction: Antiproliferative Immunosuppression x Bacterial Burden                                          |                      |              |
| Mycophenylate x Bacteria Burden                                                                              | 1.31 (0.51 - 3.33)   | 0.58         |
| No Immunosuppression x Bacterial Burden                                                                      | 1.10 (0.48 - 2.51)   | 0.83         |
| <i>Model 2: Bacterial Burden as tertiles*</i>                                                                |                      |              |
| Variable                                                                                                     | HR (95% CI)          | p-value      |
| Antiproliferative Immunosuppression <sup>†</sup>                                                             |                      |              |
| Azathioprine                                                                                                 | 1                    | Referent     |
| Mycophenylate                                                                                                | 0.92 (0.06 - 14.77)  | 0.96         |
| None/Held                                                                                                    | 3.77 (0.24 - 60.30)  | 0.35         |
| Lung Bacterial Burden Tertiles                                                                               |                      |              |
| Lowest Bacterial Burden Tertile                                                                              | 1                    | Referent     |
| Middle Bacterial Burden Tertile                                                                              | 10.27 (1.28 - 82.13) | <b>0.028</b> |
| Highest Bacterial Burden Tertile                                                                             | 9.43 (1.05 - 84.40)  | <b>0.045</b> |
| Interaction: Antiproliferative Immunosuppression x Bacterial Burden                                          |                      |              |
| Mycophenylate x Middle Bacterial Burden Tertile                                                              | 0.09 (0.00 - 2.92)   | 0.18         |
| Mycophenylate x Highest Bacterial Burden Tertile                                                             | 0.59 (0.03 - 12.26)  | 0.73         |
| No Immunosuppression x Middle Bacterial Burden Tertile                                                       | 0.28 (0.01 - 6.81)   | 0.44         |
| No Immunosuppression x Highest Bacterial Burden Tertile                                                      | 0.66 (0.03 - 14.72)  | 0.80         |
| <i>Definition of abbreviations:</i> BAL = bronchoalveolar lavage, CLAD = chronic lung allograft dysfunction. |                      |              |
| *Calculated using Cox proportional hazards regression models.                                                |                      |              |

| <b>Appendix Table 8: Evaluating the independent effects and interaction of patient age and bacterial burden on developing CLAD or death in the 500 days after one-year post-transplant surveillance BAL</b> |                     |                |
|-------------------------------------------------------------------------------------------------------------------------------------------------------------------------------------------------------------|---------------------|----------------|
| <i>Model 1: Bacterial Burden as continuous variable*</i>                                                                                                                                                    |                     |                |
| <b>Variable</b>                                                                                                                                                                                             | <b>HR (95% CI)</b>  | <b>p-value</b> |
| Age, per 1 year increase                                                                                                                                                                                    | 1.09 (0.98 - 1.22)  | 0.11           |
| Lung Bacterial Burden, per log <sub>10</sub> increase                                                                                                                                                       | 4.83 (1.49 - 15.68) | <b>0.0088</b>  |
| Interaction: Age x Bacterial Burden                                                                                                                                                                         | 0.98 (0.96 - 1.00)  | 0.12           |
| <i>Model 2: Bacterial Burden as tertiles*</i>                                                                                                                                                               |                     |                |
| <b>Variable</b>                                                                                                                                                                                             | <b>HR (95% CI)</b>  | <b>p-value</b> |
| Age, per 1 year increase                                                                                                                                                                                    | 0.97 (0.90 - 1.04)  | 0.42           |
| Lung Bacterial Burden Tertiles                                                                                                                                                                              |                     |                |
| Lowest Bacterial Burden Tertile                                                                                                                                                                             | 1                   | Referent       |
| Middle Bacterial Burden Tertile                                                                                                                                                                             | 0.11 (0.00 - 35.66) | 0.46           |
| Highest Bacterial Burden Tertile                                                                                                                                                                            | 0.74 (0.01 - 44.90) | 0.89           |
| Interaction: Age x Bacterial Burden                                                                                                                                                                         |                     |                |
| Age x Middle Bacterial Burden Tertile                                                                                                                                                                       | 1.07 (0.96 - 1.19)  | 0.22           |
| Age x Highest Bacterial Burden Tertile                                                                                                                                                                      | 1.04 (0.96 - 1.13)  | 0.32           |
| <i>Definition of abbreviations: BAL = bronchoalveolar lavage, CLAD = chronic lung allograft dysfunction.</i>                                                                                                |                     |                |
| <i>*Calculated using Cox proportional hazards regression models.</i>                                                                                                                                        |                     |                |

## References:

1. Glanville AR, Verleden GM, Todd JL, et al. Chronic lung allograft dysfunction: Definition and update of restrictive allograft syndrome-A consensus report from the Pulmonary Council of the ISHLT. *J Heart Lung Transplant* 2019; **38**(5): 483-92.
2. Miller MR, Hankinson J, Brusasco V, et al. Standardisation of spirometry. *Eur Respir J* 2005; **26**(2): 319-38.
3. Daud SA, Yusen RD, Meyers BF, et al. Impact of immediate primary lung allograft dysfunction on bronchiolitis obliterans syndrome. *Am J Respir Crit Care Med* 2007; **175**(5): 507-13.
4. Snell GI, Yusen RD, Weill D, et al. Report of the ISHLT Working Group on Primary Lung Graft Dysfunction, part I: Definition and grading-A 2016 Consensus Group statement of the International Society for Heart and Lung Transplantation. *J Heart Lung Transplant* 2017; **36**(10): 1097-103.
5. Burton CM, Iversen M, Carlsen J, et al. Acute cellular rejection is a risk factor for bronchiolitis obliterans syndrome independent of post-transplant baseline FEV1. *The Journal of heart and lung transplantation : the official publication of the International Society for Heart Transplantation* 2009; **28**(9): 888-93.
6. Khalifah AP, Hachem RR, Chakinala MM, et al. Respiratory viral infections are a distinct risk for bronchiolitis obliterans syndrome and death. *Am J Respir Crit Care Med* 2004; **170**(2): 181-7.
7. Mason KL, Erb Downward JR, Mason KD, et al. *Candida albicans* and bacterial microbiota interactions in the cecum during recolonization following broad-spectrum antibiotic therapy. *Infection and immunity* 2012; **80**(10): 3371-80.
8. Salter SJ, Cox MJ, Turek EM, et al. Reagent and laboratory contamination can critically impact sequence-based microbiome analyses. *BMC biology* 2014; **12**: 87.
9. Caporaso JG, Lauber CL, Walters WA, et al. Global patterns of 16S rRNA diversity at a depth of millions of sequences per sample. *Proceedings of the National Academy of Sciences of the United States of America* 2011; **108** Suppl 1: 4516-22.
10. Kozich JJ, Westcott SL, Baxter NT, Highlander SK, Schloss PD. Development of a dual-index sequencing strategy and curation pipeline for analyzing amplicon sequence data on the MiSeq Illumina sequencing platform. *Applied and environmental microbiology* 2013; **79**(17): 5112-20.
11. Schloss PD. MiSeq SOP - mothur. 2015. [http://www.mothur.org/wiki/MiSeq\\_SOP](http://www.mothur.org/wiki/MiSeq_SOP).
12. Sze MA, Abbasi M, Hogg JC, Sin DD. A comparison between droplet digital and quantitative PCR in the analysis of bacterial 16S load in lung tissue samples from control and COPD GOLD 2. *PloS one* 2014; **9**(10): e110351.
13. Schloss PD, Westcott SL, Ryabin T, et al. Introducing mothur: Open-Source, Platform-Independent, Community-Supported Software for Describing and Comparing Microbial Communities. *Applied and Environmental Microbiology* 2009; **75**(23): 7537.
14. O'Dwyer DN, Ashley SL, Gurczynski SJ, et al. Lung Microbiota Contribute to Pulmonary Inflammation and Disease Progression in Pulmonary Fibrosis. *Am J Respir Crit Care Med* 2019.
15. Dickson RP, Singer BH, Newstead MW, et al. Enrichment of the lung microbiome with gut bacteria in sepsis and the acute respiratory distress syndrome. *Nat Microbiol* 2016; **1**(10): 16113.
16. Oksanen J, Blanchet FG, Friendly M, et al. *vegan: Community Ecology Package*. 2019.
17. Wang Y, Naumann U, Wright ST, Warton DI. mvabund— an R package for model-based analysis of multivariate abundance data. *Methods in Ecology and Evolution* 2012; **3**(3): 471-4.
18. Legendre P, Gallagher ED. Ecologically meaningful transformations for ordination of species data. 2001; **129**(2): 271-80.
19. O'Dwyer DN, Ashley SL, Gurczynski SJ, et al. Lung Microbiota Contribute to Pulmonary Inflammation and Disease Progression in Pulmonary Fibrosis. *Am J Respir Crit Care Med* 2019; **199**(9): 1127-38.
20. Segal LN, Clemente JC, Wu BG, et al. Randomised, double-blind, placebo-controlled trial with azithromycin selects for anti-inflammatory microbial metabolites in the emphysematous lung. *Thorax* 2017; **72**(1): 13-22.
21. Dickson RP, Schultz MJ, van der Poll T, et al. Lung Microbiota Predict Clinical Outcomes in Critically Ill Patients. *American journal of respiratory and critical care medicine* 2020: 10.1164/rccm.201907-1487OC.
22. Salter SJ, Cox MJ, Turek EM, et al. Reagent and laboratory contamination can critically impact sequence-based microbiome analyses. *BMC biology* 2014; **12**: 87-.
23. Chambers DC, Cherikh WS, Harhay MO, et al. The International Thoracic Organ Transplant Registry of the International Society for Heart and Lung Transplantation: Thirty-sixth adult lung and heart-lung transplantation Report-2019; Focus theme: Donor and recipient size match. *J Heart Lung Transplant* 2019; **38**(10): 1042-55.
24. Glanville AR, Aboyou CL, Havryk A, Plit M, Rainer S, Malouf MA. Severity of lymphocytic bronchiolitis predicts long-term outcome after lung transplantation. *Am J Respir Crit Care Med* 2008; **177**(9): 1033-40.
25. Tikkanen JM, Singer LG, Kim SJ, et al. De Novo DQ Donor-Specific Antibodies Are Associated with Chronic Lung Allograft Dysfunction after Lung Transplantation. *Am J Respir Crit Care Med* 2016; **194**(5): 596-606.
26. Safavi S, Robinson DR, Soresi S, Carby M, Smith JD. De novo donor HLA-specific antibodies predict development of bronchiolitis obliterans syndrome after lung transplantation. *J Heart Lung Transplant* 2014; **33**(12): 1273-81.
27. Paraskeva M, Bailey M, Levvey BJ, et al. Cytomegalovirus replication within the lung allograft is associated with bronchiolitis obliterans syndrome. *American journal of transplantation : official journal of the American Society of Transplantation and the American Society of Transplant Surgeons* 2011; **11**(10): 2190-6.
28. Snyder LD, Finlen-Copeland CA, Turbyfill WJ, Howell D, Willner DA, Palmer SM. Cytomegalovirus pneumonitis is a risk for bronchiolitis obliterans syndrome in lung transplantation. *Am J Respir Crit Care Med* 2010; **181**(12): 1391-6.

29. Verleden GM, Glanville AR, Lease ED, et al. Chronic lung allograft dysfunction: Definition, diagnostic criteria, and approaches to treatment-A consensus report from the Pulmonary Council of the ISHLT. *J Heart Lung Transplant* 2019; **38**(5): 493-503.
30. Dickson RP, Erb-Downward JR, Freeman CM, et al. Changes in the lung microbiome following lung transplantation include the emergence of two distinct *Pseudomonas* species with distinct clinical associations. *PloS one* 2014; **9**(5): e97214-e.
31. Dickson RP, Erb-Downward JR, Prescott HC, et al. Cell-associated bacteria in the human lung microbiome. *Microbiome* 2014; **2**: 28.
